# Supplementary material for: A gold-complex initiated functionalization of biologically active polyphenols applied to a 18F-labeled chemical probe
Source: Royal Society of Chemistry journal article supplement (doi:10.1039/d3ob00856h), 2023-01-01

Electronic Supplementary Information for

## **A gold-complex initiated functionalization of biologically active polyphenols applied to $^{18}\text{F}$ -labeled chemical probe**

Ziyun Liu<sup>a</sup>, Yuki Fukagawa<sup>a</sup>, Masaharu Yamano<sup>a</sup>, Tetsuro Tago<sup>b</sup>, Kumiko Iwai<sup>a</sup>, Keiichi Hirano<sup>d</sup>, Motofumi Kumazoe<sup>c</sup>, Hirofumi Tachibana<sup>c</sup>, Jun Toyohara<sup>d</sup>, and Hiroshi Tanaka<sup>\*,a</sup>

*<sup>a</sup>Department of Chemical Science and Engineering, Tokyo Institute of Technology*

*Address 12-12-1-H101 Ookayama, Meguro, Tokyo, 152-8552, Japan*

*E-mail: thiroshi@cap.mac.titech.ac.jp*

*<sup>b</sup>Research Team for Neuroimaging, Tokyo Metropolitan Institute for Geriatrics and Gerontology*

*35-2 Sakae-cho, Itabashi-ku, Tokyo 173-0015, Japan*

*<sup>c</sup>Division of Applied Biological Chemistry, Department of Bioscience and Biotechnology, Faculty of Agriculture, Kyushu University, Fukuoka, 819-0395, Japan*

*<sup>d</sup>NMP Business Support Co., Ltd., Hyogo 669-1339, Japan.*

## General Information

NMR spectra were recorded on a JEOL Model ECP-400 (400 MHz for  $^1\text{H}$ , 400 MHz for  $^{13}\text{C}$ , 376 MHz for  $^{19}\text{F}$ ) and Bruker AVANCE III HD 400 (400 MHz for  $^1\text{H}$ , 400 MHz for  $^{13}\text{C}$ , 376 MHz for  $^{19}\text{F}$ ) instrument in the indicated solvent. Chemical shifts are reported in units of parts per million (ppm) relative to the signal for internal tetramethylsilane (0 ppm for  $^1\text{H}$ ) for solutions in  $\text{CDCl}_3$ .  $^1\text{H}$  NMR spectral data are reported as follows:  $\text{CDCl}_3$  (7.26 ppm).  $^{13}\text{C}$  NMR spectral data are reported as follows:  $\text{CDCl}_3$  (77.16 ppm).  $^{19}\text{F}$  NMR spectral data are reported as follows:  $\text{C}_6\text{H}_5\text{CF}_3$  (-63.72 ppm) as an external standard. Multiplicities are reported by using the following abbreviations: s, singlet; br-s, broadened-singlet; d, doublet; br-d, broadened-doublet; dd, doublet of doublets; br-dd, broadened-doublet of doublets; t, triplet; dq, doublet of quartets; q, quartet, m, multiplet; and,  $J$ , coupling constants in Hertz.

IR spectra were recorded on a Perkin Elmer Spectrum One FT-IR spectrophotometer or JASCO FT/IR-4200 spectrophotometer. Only the strongest and/or structurally important absorption is reported as the IR data in  $\text{cm}^{-1}$ .

All reactions were monitored by thin-layer chromatography carried out on 0.2 mm E. Merck silica gel plates (60F-254) with UV light, visualized by p-anisaldehyde solution, ceric sulfate or ethanolic phosphomolybdic acid. Column chromatography separations were performed using silica gel (Merck silica gel 60, 0.063 – 0.200 mm).

Gel permeation chromatography (GPC) for quantitative analysis were performed on a Japan Analytical Industry Model LC 605 (recycling preparative HPLC), with a Japan Analytical Industry Model RI-5 refractive index detector and a Japan Analytical Industry Model 301 ultra violet detector with polystyrene gel column (JAIGEL1H, 20 mm x 600 mm) using chloroform as a solvent (3.50 mL/min).

### (4-methoxybenzamido)methyl 2-(cyclopropylethynyl)benzoate (**14**)

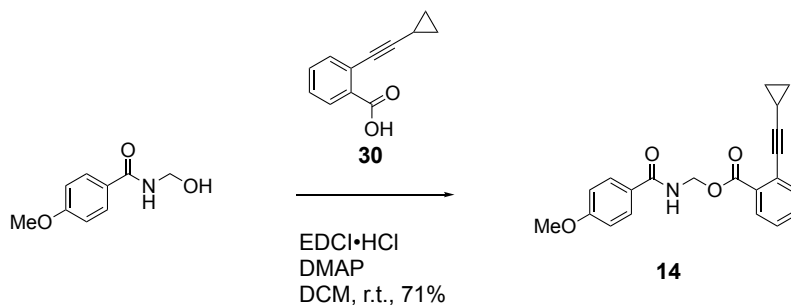

To a stirred solution of *N*-(hydroxymethyl)-4-methoxybenzamide (50.0 mg, 276  $\mu\text{mol}$ ) and 2-(cyclopropylethynyl)benzoic acid (**30**) (103 mg, 552  $\mu\text{mol}$ ) in dry DCM (2.76 mL) were added DMAP (67.4 mg, 552  $\mu\text{mol}$ ) and EDCI·HCl (159 mg, 828  $\mu\text{mol}$ ) at 0 °C. After being stirred at room temperature for 30 min, the reaction mixture was poured into  $\text{NH}_4\text{Cl}$  aq. and EtOAc at 0 °C. The aqueous layer was extracted with ethyl acetate twice. The combined extract was washed with brine, dried over  $\text{MgSO}_4$ , filtered, and concentrated *in vacuo*. The residue was purified by column chromatography on silica gel with hexane/ethyl acetate (1/1) to give **14** (70.5 mg, 202  $\mu\text{mol}$ , 71%).  $^1\text{H}$  NMR (400 MHz,  $\text{CDCl}_3$ )  $\delta$  7.95 (d, 1H,  $J = 7.2$  Hz), 7.79 (d, 2H,  $J = 8.8$  Hz), 7.47 (d, 1H,  $J = 6.8$  Hz), 7.43 ~ 7.37 (m, 2H), 7.28 (d, 1H,  $J = 7.6$  Hz), 6.93 (d, 2H,  $J = 8.8$  Hz), 5.70 (d, 2H,  $J = 7.6$  Hz), 3.85 (s, 3H, 1.55–1.48 (m, 1H), 0.926 ~ 0.867 (m, 4H);  $^{13}\text{C}$  NMR (400 MHz,  $\text{CDCl}_3$ )  $\delta$  166.4, 166.1, 162.1, 133.6, 131.4, 130.0, 128.6, 126.4, 124.9, 124.3, 113.2, 99.2, 73.7, 64.6, 54.8, 8.34; FT-IR (neat) 3335, 2229, 1717, 1654, 1606, 1540, 1505, 1255, 1243, 1181, 1057, 1037, 930, 846, 757 ( $\text{cm}^{-1}$ ); HRMS (ESI-TOF) calcd. for  $\text{C}_{21}\text{H}_{19}\text{NO}_4$  372.12118 $[\text{M}+\text{Na}]^+$ , found 372.12140.

### An electrophilic aromatic substitution of *O*-octamethyl EGCG

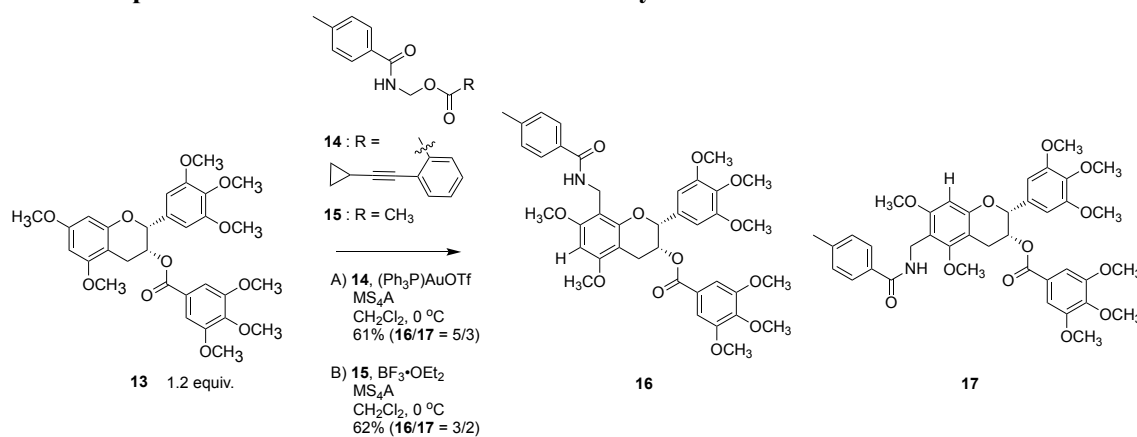

### A gold-catalyzed reaction

To  $\text{MS}_4\text{A}$  (53.8 mg, 2.00 g/mmol) heated by heat gun for 15 min was added **14** (9.60 mg, 26.9  $\mu\text{mol}$ )

and (2*R*,3*R*)-5,7-dimethoxy-2-(3,4,5-trimethoxyphenyl)chroman-3-yl 3,4,5-trimethoxybenzoate (**13**) (18.4 mg, 32.3  $\mu\text{mol}$ ) in DCM (0.50 mL) at 0 °C. After being stirred at room temperature for 1 h, (PPh<sub>3</sub>)AuOTf (26.9  $\mu\text{L}$ , 26.9  $\mu\text{mol}$ , 1.00 mmol/mL in DCM) was added to the reaction mixture at 0 °C. After being stirred at 0 °C for 10 min, the reaction mixture was filtered through celite, washed by DCM, and concentrated *in vacuo*. The residue was purified by column chromatography on silica gel with hexane/ethyl acetate (1/4) and further purified by a gel permeation chromatography (GPC) to give mixture of (2*R*,3*R*)-5,7-dimethoxy-8-((4-methoxybenzamido)methyl)-2-(3,4,5-trimethoxyphenyl)chroman-3-yl 3,4,5-trimethoxybenzoate (**16**) and (2*R*,3*R*)-5,7-dimethoxy-6-((4-methoxybenzamido)methyl)-2-(3,4,5-trimethoxyphenyl)chroman-3-yl 3,4,5-trimethoxybenzoate (**17**) (12.1 mg, 19.7  $\mu\text{mol}$ , 61%). Then ratio of the mixture was decided by <sup>1</sup>H NMR which showed **16/17** = 5/3.

### An acid-catalyzed reaction

To a stirred solution of (4-methoxybenzamide)methyl acetate (100 mg, 448  $\mu\text{mol}$ ) and **13** (307 mg, 538  $\mu\text{mol}$ ) in dry DCM (4.50 mL) were dropped distilled BF<sub>3</sub>OEt<sub>2</sub> (56.3  $\mu\text{L}$ , 63.5 mg, 1.13 g/mL, 448  $\mu\text{mol}$ ) at -40 °C. Then warmed up to -20 °C. After reacting at -20 °C for 10 min, the reaction mixture was quenched by Et<sub>3</sub>N (62.4  $\mu\text{L}$ , 45.3 mg, 0.726 g/mL, 448  $\mu\text{mol}$ ) and poured into NaHCO<sub>3</sub> aq. and ethyl acetate at 0 °C. The aqueous layer was extracted with ethyl acetate twice. The combined extract was washed with brine, dried over MgSO<sub>4</sub>, filtered, and concentrated *in vacuo*. The residue was short passed by column chromatography on silica gel with hexane/ethyl acetate (1/4) and further purified by Gel Permeation Chromatography (GPC) to give mixture of **16/17** (203 mg, 277  $\mu\text{mol}$ , 62%). Then ratio of the mixture was decided by <sup>1</sup>H NMR which showed **16/17** = 3/2. Then further purification was done by column chromatography on silica gel with hexane/ethyl acetate (3/7) to give pure **16** and **17**. **16**: [ $\alpha$ ]<sub>D</sub><sup>21</sup> -60.7 (*c* 1.32, CHCl<sub>3</sub>); <sup>1</sup>H NMR (400 MHz, CDCl<sub>3</sub>)  $\delta$  7.62 (d, 2H, *J* = 8.8 Hz), 7.08 (s, 2H), 6.84 (d, 2H, *J* = 8.8 Hz), 6.81 (s, 2H), 6.60 (t, 1H, *J* = 5.4 Hz), 6.18 (s, 1H), 5.70 (br, 1H), 5.17 (s, 1H), 5.04, 4.56 (dd, 2H, *J* = 6.6, 13.8 Hz), 3.91 (s, 3H), 3.85 (s, 3H), 3.83 (s, 3H), 3.82 (s, 3H), 3.81 (s, 3H); 3.78 (s, 6H), 3.64 (s, 6H); <sup>13</sup>C NMR (400 MHz, CDCl<sub>3</sub>)  $\delta$  165.8, 165.3, 161.9, 158.1, 157.8, 153.2, 153.1, 152.8, 142.3, 137.6, 133.3, 128.5, 127.2, 124.9, 113.6, 106.8, 106.1, 103.3, 100.4, 88.2, 77.5, 77.2, 68.4, 60.8, 56.1, 56.0, 55.9, 55.8, 55.4, 55.3, 32.8, 25.9; FT-IR (neat) 3000, 2940, 2838, 1714, 1593, 1503, 1460, 1416, 1359, 1332, 1252, 1224, 1127, 765 (cm<sup>-1</sup>); HRMS (ESI-TOF) calcd. for C<sub>39</sub>H<sub>43</sub>NO<sub>13</sub> 756.26321 [M+Na]<sup>+</sup>, found 756.26306; **17**: [ $\alpha$ ]<sub>D</sub><sup>21</sup> -55.6 (*c* 1.00, CHCl<sub>3</sub>); <sup>1</sup>H NMR (400 MHz, CDCl<sub>3</sub>)  $\delta$  7.71 (d, 2H, *J* = 6.8 Hz), 7.14 (s, 2H), 6.89 (d, 2H, *J* = 6.8 Hz), 6.70 (s, 2H), 6.61 (t, 1H, *J* = 5.6 Hz), 6.47 (s, 1H), 5.68 (br, 1H), 5.13 (s, 1H), 4.80, 4.56 (dd, 2H, *J* = 6.0, 14.0 Hz), 3.81 (s, 3H), 3.85 (s, 3H), 3.84 (s, 3H), 3.82 (s, 3H), 3.80 (s, 9H), 3.73 (s, 6H); <sup>13</sup>C NMR (400 MHz, CDCl<sub>3</sub>)  $\delta$  166.3, 165.1, 162.0, 158.0,

155.2, 153.2, 152.9, 142.7, 138.0, 133.0, 128.6, 127.2, 124.8, 113.6, 112.7, 107.3, 104.9, 103.9, 95.9, 77.9, 77.2, 68.4, 61.5, 60.9, 60.8, 56.3, 56.0, 55.9, 55.3, 33.6, 26.2; FT-IR (neat) 2940, 2838, 1715, 1644, 1606, 1591, 1542, 1456, 1417, 1252, 1220, 1127, 772 (cm<sup>-1</sup>); HRMS (ESI-TOF) calcd. for C<sub>39</sub>H<sub>43</sub>NO<sub>13</sub> 756.26321 [M+Na]<sup>+</sup>, found 756.26271.

### 2-((5-((benzyloxy)methyl)-2,2-dimethyl-1,3-dioxan-5-yl)methoxy)acetamide (**25**)

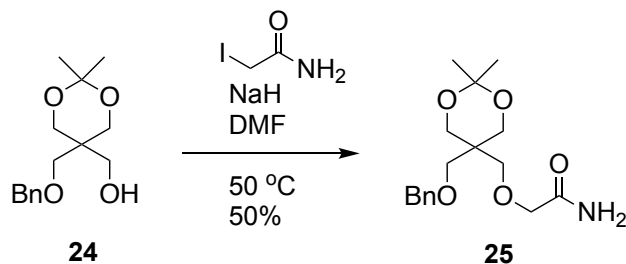

To a stirred solution of sodium hydride (51.0 mg, 1.28 mmol) in dry DMF (1.0 mL) was added methyl (2,2-Dimethyl-5-(benzyloxymethyl)-1,3-dioxane-5-yl)methanol (**24**) (170 mg, 638  $\mu$ mol) in dry DMF (2.0 mL) at 0 °C. After the reaction mixture was stirred at room temperature for 1h, 2-iodoacetamide (177 mg, 957  $\mu$ mol) was added to reaction mixture. After being stirred at room temperature for 12 h, the reaction mixture was poured into water and EtOAc at 0 °C. The aqueous layer was extracted with ethyl acetate twice. The combined extract was washed with brine, dried over MgSO<sub>4</sub>, filtered and concentrated *in vacuo*. evaporated. The residue was purified by column chromatography on silica gel with hexane/ethyl acetate (1/4) to give **25** (103 mg, 320  $\mu$ mol, 50%). <sup>1</sup>H NMR (400 MHz, CDCl<sub>3</sub>)  $\delta$  7.28-7.38 (m, 5H), 6.77 (br, 1H), 5.41 (br, 1H), 4.51 (s, 2H), 3.94 (s, 2H), 3.70-3.80 (m, 4H), 3.60 (s, 2H), 3.47 (s, 2H), 1.40 (d, 6H, *J* = 6.8 Hz); <sup>13</sup>C NMR (400 MHz, CDCl<sub>3</sub>)  $\delta$  172.8, 137.7, 128.5, 127.9, 127.7, 98.5, 73.6, 70.9, 70.3, 69.9, 62.9, 39.0, 24.8, 22.5; FT-IR (neat) 2992, 2870, 1697, 1684, 1455, 1373, 1200, 1119, 1085, 1029, 829, 771, 740, 699(cm<sup>-1</sup>); HRMS (ESI-TOF) calcd. for C<sub>17</sub>H<sub>25</sub>NO<sub>5</sub> 346.16304 [M+Na]<sup>+</sup>, found 346.16244.

### 2-((5-(hydroxymethyl)-2,2-dimethyl-1,3-dioxan-5-yl)methoxy)acetamide (**26**)

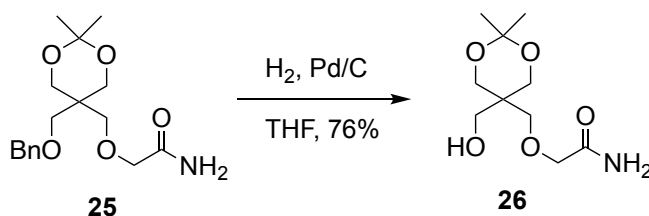

To a stirred solution of Pd/C (6.93 g, 0.30 g/mmol, 10%) in THF (348 mL) was added **25** (7.48 g, 23.1 mmol) at 0 °C. Then H<sub>2</sub> gas was added to reaction mixture. After being stirred at room temperature for 2 h, the reaction mixture was filtered through celite, washed by ethyl acetate, and then evaporated. The residue was recrystallized from hexane/EtOAc to give **26** (4.13 g, 17.7 mmol,

76%).  $^1\text{H}$  NMR (400 MHz,  $\text{CDCl}_3$ )  $\delta$  6.78 (br, 1H), 5.50 (br, 1H), 4.01 (s, 2H), 3.74 (s, 4H), 3.69 (s, 2H), 3.63 (s, 2H), 3.48 (s, 2H), 1.42 (d, 6H,  $J = 6.4$  Hz);  $^{13}\text{C}$  NMR (400 MHz,  $\text{CDCl}_3$ )  $\delta$  172.6, 98.6, 71.5, 70.2, 63.2, 62.7, 39.3, 24.7, 22.7; FT-IR (neat) 3420, 2992, 2940, 2879, 1682, 1385, 1200, 1153, 1123, 1082, 1048, 828 ( $\text{cm}^{-1}$ ); HRMS (ESI-TOF) calcd. for  $\text{C}_{10}\text{H}_{19}\text{NO}_5$  256.11609  $[\text{M}+\text{Na}]^+$ , found 256.11573.

**(5-((2-amino-2-oxoethoxy)methyl)-2,2-dimethyl-1,3-dioxan-5-yl)methyl 4-(didodecylcarbamoyl)benzenesulfonate (28)**

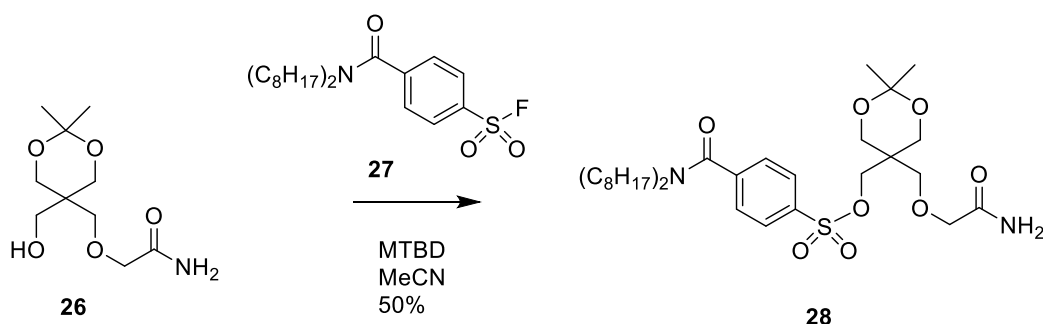

To a stirred solution of **26** (20.6 mg, 88.3  $\mu\text{mol}$ ) in dry MeCN (0.88 mL) was added 7-Methyl-1,5,7-triazabicyclo[4.4.0]dec-5-ene (MTBD) (27.1 mg, 25.5  $\mu\text{L}$ , 177  $\mu\text{mol}$ , 1.06 g/mL) and 4-(didodecylcarbamoyl)benzenesulfonyl fluoride (**27**) (57.2 mg, 106  $\mu\text{mol}$ ) at 0  $^\circ\text{C}$ . After being stirred at room temperature for 2.0 h, the reaction mixture was poured into water and EtOAc at 0  $^\circ\text{C}$ . The aqueous layer was extracted with ethyl acetate twice. The combined extract was washed with brine, dried over  $\text{MgSO}_4$ , filtered and concentrated *in vacuo*. The residue was purified by column chromatography on silica gel with hexane/ethyl acetate (1/3, 0/1) to give **28** (33.3 mg, 44.1  $\mu\text{mol}$ , 50%).  $^1\text{H}$  NMR (400 MHz,  $\text{CDCl}_3$ )  $\delta$  7.94 (d, 2H,  $J = 8.4$  Hz), 7.53 (d, 2H,  $J = 8.0$  Hz), 6.34(br, 1H), 5.80 (br, 1H), 4.13 (s, 2H), 3.88 (s, 2H), 3.64-3.71 (m, 4H), 3.46-3.50 (m, 4H), 3.10-3.14 (m, 2), 1.73, 1.66 (m, 4H), 1.50 (d, 6H  $J = 7.2$  Hz), 1.27 (s, 36), 0.881(t, 6H,  $J = 6.4$  Hz);  $^{13}\text{C}$  NMR (400 MHz,  $\text{CDCl}_3$ )  $\delta$  171.6, 169.4, 143.1, 135.6, 128.3, 127.4, 98.9, 70.8, 69.9, 69.3, 62.0, 49.0, 44.9, 38.6, 31.9, 29.6, 29.4, 29.3, 29.1, 27.4, 26.6, 24.1, 22.8, 22.7, 14.1; FT-IR (neat) 3465, 2923, 2853, 1686, 1629, 1428, 1369, 1187, 1089, 971, 831, 612( $\text{cm}^{-1}$ ); HRMS (ESI-TOF) calcd. for  $\text{C}_{41}\text{H}_{72}\text{N}_2\text{O}_8\text{S}$  775.49071  $[\text{M}+\text{Na}]^+$ , found 775.49179.

**(5-((2-amino-2-oxoethoxy)methyl)-2,2-dimethyl-1,3-dioxan-5-yl)methyl 4-(didodecylcarbamoyl)benzenesulfonate (29)**

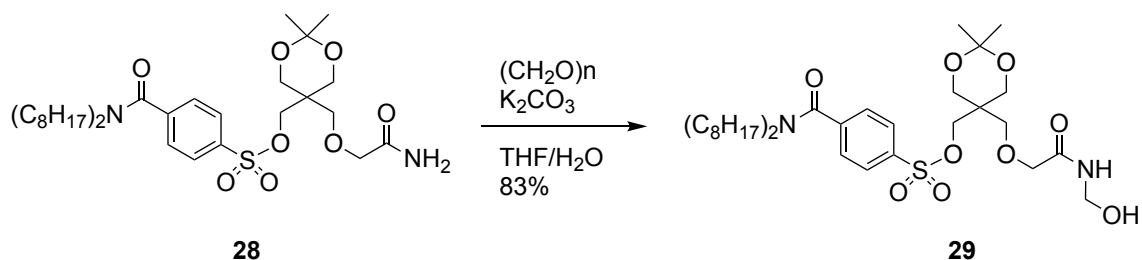

To a stirred solution of **29** (23.5 mg, 31.2  $\mu\text{mol}$ ) in THF (0.25 mL) and water (0.25 mL) was added potassium carbonate (12.9 mg, 93.6  $\mu\text{mol}$ ) and paraformaldehyde (28.1 mg, 936  $\mu\text{mol}$ ) at 0 °C. After being stirred at room temperature for 12 h, the reaction mixture was poured into  $\text{NH}_4\text{Cl}$  aq. and EtOAc at 0 °C. The aqueous layer was extracted with ethyl acetate twice. The combined extract was washed with brine, dried over  $\text{MgSO}_4$ , filtered, and concentrated *in vacuo*. The residue was purified by column chromatography on silica gel with hexane/ethyl acetate (1/3) to give **29** (20.2 mg, 25.8  $\mu\text{mol}$ , 83%).  $^1\text{H}$  NMR (400 MHz,  $\text{CDCl}_3$ )  $\delta$  7.94 (d, 2H,  $J = 8.8$  Hz), 7.53 (d, 2H,  $J = 8.4$  Hz), 7.08 (br, 1H), 4.78-4.81 (m, 2H), 4.26-4.30 (m, 1H), 4.09 (s, 2H), 3.86 (s, 2H), 3.67 (s, 4), 3.46-3.50 (m, 4H), 3.08-3.10 (m, 2H), 1.38 (d, 6H,  $J = 5.6$  Hz), 1.35 (m, 4H), 1.26 (m, 36H), 0.880 (t, 6H,  $J = 6.6$  Hz);  $^{13}\text{C}$  NMR (400 MHz,  $\text{CDCl}_3$ )  $\delta$  169.6, 142.7, 135.5, 128.3, 127.4, 99.0, 70.7, 69.6, 69.3, 63.9, 62.0, 49.1, 45.0, 38.6, 31.9, 29.6, 29.5, 29.4, 29.3, 29.1, 28.7, 27.4, 27.0, 26.5, 23.8, 23.1, 22.7, 14.1; FT-IR (neat) 3401, 2926, 2854, 1683, 1635, 1540, 1456, 1373, 1188, 1089, 971, 842, 772( $\text{cm}^{-1}$ ); HRMS (ESI-TOF) calcd. for  $\text{C}_{43}\text{H}_{76}\text{N}_2\text{O}_8\text{S}$  805.50127 [ $\text{M}+\text{Na}$ ]<sup>+</sup>, found 805.50175.

**(2-(((5-(((4-(dioctylcarbamoyl)phenyl)sulfonyl)oxy)methyl)-2,2-dimethyl-1,3-dioxan-5-yl)methoxy)acetamido)methyl 2-(cyclopropylethynyl)benzoate (22a)**

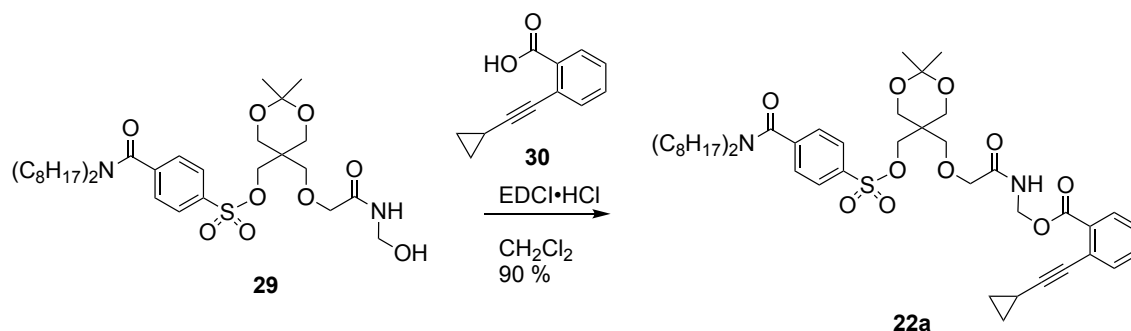

To a stirred solution of **29** (14.5 mg, 21.6  $\mu\text{mol}$ ) and 2-(cyclopropylethynyl)benzoic acid (**30**) (8.85 mg, 47.5  $\mu\text{mol}$ ) in DCM (0.50 mL) were added  $(\text{PPh}_3)\text{AuOTf}$  (12.4 mg, 64.8  $\mu\text{mol}$ , 1.00 mmol/mL in DCM) and DMAP (5.28 mg, 43.2  $\mu\text{mol}$ ) at 0 °C. After being stirred at room temperature for 2 h, the reaction mixture was poured into  $\text{NH}_4\text{Cl}$  aq. and EtOAc at 0 °C. The aqueous layer was extracted

with ethyl acetate twice. The combined extract was washed with brine, dried over MgSO<sub>4</sub>, filtered, and concentrated *in vacuo*. The residue was purified by column chromatography on silica gel with EtOAc/hexane (1/4, 1/1) to give **22a** (16.4 mg, 19.5 μmol, 90%). <sup>1</sup>H NMR (400 MHz, CDCl<sub>3</sub>) δ 7.96 (d, 2H, *J* = 8.0 Hz), 7.92 (d, 1H, *J* = 8.0 Hz), 7.69 (t, 1H, *J* = 7.2 Hz), 7.52 (d, 2H, *J* = 8.0 Hz), 7.38-7.46 (m, 2H), 7.26-7.29 (m, 1H), 5.55 (d, 2H, *J* = 7.6 Hz), 4.17 (s, 2H), 3.98 (s, 2H), 3.64-3.73 (m, 4H), 3.46-3.50 (m, 4H), 3.11 (t, 1H, *J* = 7.2 Hz), 1.44-1.65 (m, 3H), 1.36 (s, 6H), 1.26 (m, 36H), 0.923-0.882 (m, 8H); <sup>13</sup>C NMR (400 MHz, CDCl<sub>3</sub>) δ 169.7, 165.6, 134.9, 133.6, 132.4, 131.3, 130.1, 129.2, 127.1, 126.3, 124.3, 99.3, 97.8, 73.7, 70.1, 63.3, 62.5, 61.9, 39.3, 26.2, 24.5, 21.7, 18.7, 8.33; FT-IR (neat) 3394, 2924, 2853, 2229, 1704, 1635, 1508, 1456, 1371, 1188, 1090, 956, 831, 757, 611 (cm<sup>-1</sup>); HRMS (ESI-TOF) calcd. for C<sub>54</sub>H<sub>82</sub>N<sub>2</sub>O<sub>10</sub>S 973.55878 [M+Na]<sup>+</sup>, found 973.55933.

### Preparation of 22b

#### 2-((5-(((tert-butyl)diphenylsilyl)oxy)methyl)-2,2-dimethyl-1,3-dioxan-5-yl)methoxy)acetamide (S1)

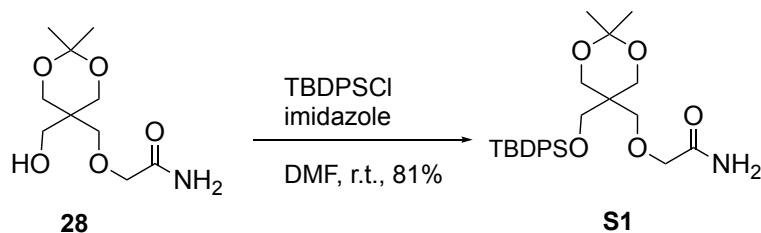

To a stirred solution of **28** (2.00 g, 8.57 mmol) in dry DMF (12.8 mL) was added imidazole (1.17 g, 17.1 mmol) and tert-butylchlorodiphenylsilane (2.42 mL, 9.43 mmol, 1.1 eq.) at 0 °C. After being stirred at room temperature for 2.5 h, the reaction mixture was poured into NH<sub>4</sub>Cl aq. and EtOAc at 0 °C. The aqueous layer was extracted with ethyl acetate twice. The combined extract was washed with brine, dried over MgSO<sub>4</sub>, filtered, and concentrated *in vacuo*. The residue was purified by column chromatography on silica gel with hexane/ethyl acetate (1/1, 0/1) to give **S1** (3.26 g, 6.94 mmol, 81%). <sup>1</sup>H NMR (400 MHz, CDCl<sub>3</sub>) δ 7.61-7.64 (m, 4H), 7.46-7.36 (m, 6H), 6.44 (br, 1H), 5.28 (br, 1H), 3.93 (s, 2), 3.76 (m, 4H), 3.63 (d, 2H, *J* = 4.4 Hz), 1.40 (s, 6H), 1.06 (s, 9H); <sup>13</sup>C NMR (400 MHz, CDCl<sub>3</sub>) δ 172.5, 135.5, 132.7, 129.9, 127.8, 98.4, 70.5, 63.1, 62.6, 39.8, 26.8, 25.3, 22.1, 19.3; FT-IR (neat) 3476, 3312, 3223, 3071, 3048, 2992, 2957, 2931, 2886, 2857, 1692, 1428, 1200, 1112, 1082, 832, 824, 756, 702, 614, 505 (cm<sup>-1</sup>); HRMS (ESI-TOF) calcd. for C<sub>26</sub>H<sub>37</sub>NO<sub>5</sub>Si 494.23387 [M+Na]<sup>+</sup>, found 494.23393.



**2-((5-(((tert-butyl)diphenylsilyl)oxy)methyl)-2,2-dimethyl-1,3-dioxan-5-yl)methoxy)-N-(hydroxymethyl)acetamide (S2)**

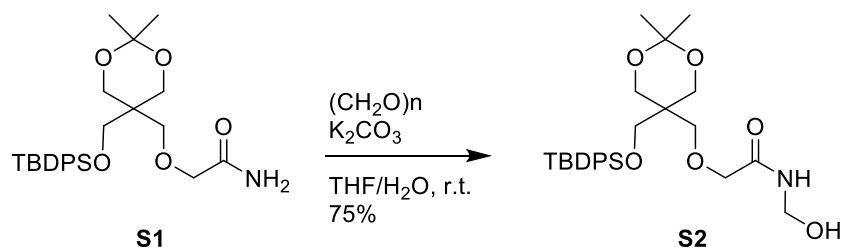

To a stirred solution of **S1** (2.62 g, 5.55 mmol) in THF (15.0 mL) and water (15 mL) was added potassium carbonate (2.30 g, 16.7 mmol) and paraformaldehyde (1.67 g, 55.5 mmol) at 0 °C. After being stirred at room temperature for 2.5 h, the reaction mixture was poured into  $\text{NH}_4\text{Cl}$  aq. and EtOAc at 0 °C. The aqueous layer was extracted with ethyl acetate twice. The combined extract was washed with brine, dried over  $\text{MgSO}_4$ , filtered, and concentrated *in vacuo*. The residue was recrystallized from hexane/EtOAc to give **S2** (2.09 g, 4.17 mmol, 75%).  $^1\text{H}$  NMR (400 MHz,  $\text{CDCl}_3$ )  $\delta$  7.64-7.61 (m, 4H), 7.46-7.35 (m, 6H), 4.71-4.74 (m, 2H), 3.95 (s, 2), 3.85-3.69 (m, 4H), 3.65 (s, 2H, H-d), 3.59 (s, 2), 3.16 (t, 1H,  $J = 7.6$  Hz), 1.41 (d, 6H,  $J = 3.6$  Hz), 1.06 (s, 9H);  $^{13}\text{C}$  NMR (400 MHz,  $\text{CDCl}_3$ )  $\delta$  171.7, 135.5, 133.0, 129.9, 127.8, 98.5, 70.4, 64.3, 63.2, 62.6, 39.9, 26.8, 26.0, 21.4, 19.3; FT-IR (neat) 3591, 3380, 2083, 1644, 1080, 821, 771, 742, 702 ( $\text{cm}^{-1}$ ); HRMS (ESI-TOF) calcd. for  $\text{C}_{27}\text{H}_{39}\text{NO}_6\text{Si}$  524.24443  $[\text{M}+\text{Na}]^+$ , found 524.24403.

**(2-((5-(((tert-butyl)diphenylsilyl)oxy)methyl)-2,2-dimethyl-1,3-dioxan-5-yl)methoxy)acetamido)methyl 2-(cyclopropylethynyl)benzoate (22b)**

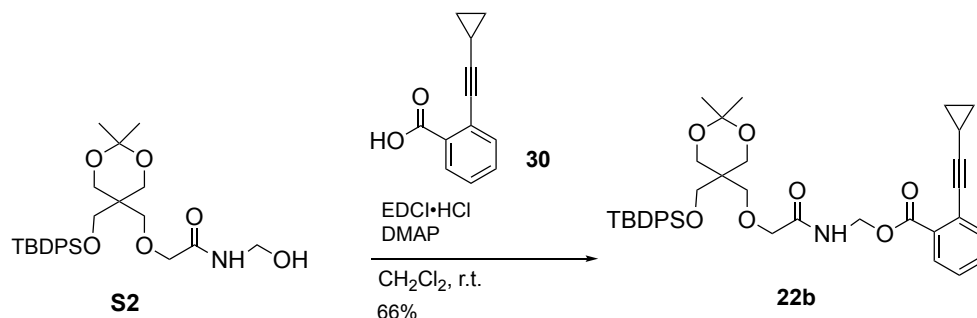

To a stirred solution of **S2** (20.8 mg, 41.5  $\mu\text{mol}$ ) and **30** (8.49 mg, 45.6  $\mu\text{mol}$ ) in DCM (0.4 mL) were added  $\text{EDCI}\cdot\text{HCl}$  (11.9 mg, 62.2  $\mu\text{mol}$ ) and DMAP (5.07 mg, 41.5  $\mu\text{mol}$ ) at 0 °C. After being stirred at room temperature for 13 h, the reaction mixture was poured into  $\text{NH}_4\text{Cl}$  aq. and EtOAc at 0 °C. The aqueous layer was extracted with ethyl acetate twice. The combined extract was washed with brine, dried over  $\text{MgSO}_4$ , filtered, and concentrated *in vacuo*. The residue was purified by column chromatography on silica gel with EtOAc:toluene = 2% and 10% to give **22b** (18.5 mg, 27.6  $\mu\text{mol}$ , 66%).  $^1\text{H}$  NMR (400 MHz,  $\text{CDCl}_3$ )  $\delta$  7.88 (dd, 1H,  $J = 7.8$  Hz, 1.0 Hz), 7.63-7.61 (m, 4H), 7.53(t,

1H,  $J = 7.6\text{Hz}$ ), 7.43-7.41 (m, 2H), 7.34-7.40 (m, 6H), 7.25-7.28(m, 1), 5.48 (d, 2H,  $J = 7.2\text{ Hz}$ ), 3.98 (s, 2), 3.72-3.83 (m, 4H), 3.63 (s, 4H), 1.46-1.55 (m, 1H), 1.39 (s, 6), 1.04 (s, 9), 0.846-0.887 (m, 4);  $^{13}\text{C}$  NMR (400 MHz,  $\text{CDCl}_3$ )  $\delta$  169.7, 165.6, 134.9, 133.6, 132.4, 131.3, 130.1, 129.2, 127.1, 126.3, 124.3, 99.3, 97.8, 73.7, 70.1, 63.3, 62.5, 61.9, 39.3, 26.2, 24.5, 21.7, 18.7, 8.33; FT-IR (neat) 3654, 3435, 3361, 2931, 2857, 2230, 1703, 1516, 1238, 1112, 1081, 833, 757, 702, 614, 505, 491 ( $\text{cm}^{-1}$ ); HRMS (ESI-TOF) calcd. for  $\text{C}_{39}\text{H}_{47}\text{NO}_7\text{Si}$  692.30195  $[\text{M}+\text{Na}]^+$ , found 692.30273.

**(2*R*,3*R*)-5,7-dimethoxy-2-(3,4,5-trimethoxyphenyl)chroman-3-ol (S3)**

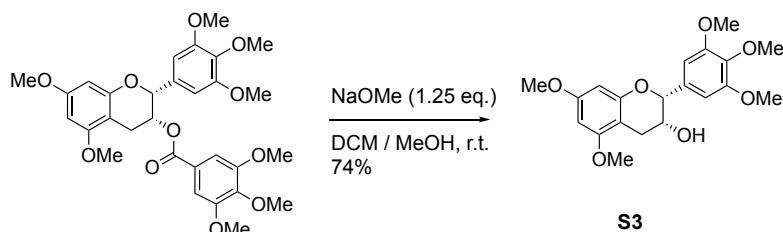

To a stirred solution of (2*R*,3*R*)-5,7-dimethoxy-2-(3,4,5-trimethoxyphenyl)chroman-3-yl 3,4,5-trimethoxybenzoate (**13**) (1.50 g, 2.63 mmol) in MeOH (8.75 mL) and DCM (8.75 mL) was added sodium methanolate (178 mg, 3.29 mmol) at 0 °C. After being stirred at room temperature for 12h, the reaction mixture was poured into  $\text{NH}_4\text{Cl}$  aq. and EtOAc at 0 °C. The aqueous layer was extracted with ethyl acetate twice. The combined extract was washed with brine, dried over  $\text{MgSO}_4$ , filtered, and concentrated *in vacuo*. The residue was recrystallized from hexane/ EtOAc to give **S3** (728 mg, 1.93 mmol, 74%).  $[\alpha]_{\text{D}}^{21} +10.76$  ( $c$  1.00,  $\text{CHCl}_3$ );  $^1\text{H}$  NMR (400 MHz,  $\text{CDCl}_3$ )  $\delta$  6.75 (s, 2H), 6.21 (d, 1H,  $J=2.4\text{Hz}$ ), 6.12 (d, 1H,  $J=2.4\text{Hz}$ ), 4.94 (s, 1H), 4.29 (br, 1H), 3.90 (s, 6H), 3.86 (s, 3H), 3.80 (s, 3H), 3.78 (s, 3H), 3.00-2.86 (m, 2H, H-4);  $^{13}\text{C}$  NMR (400 MHz,  $\text{CDCl}_3$ )  $\delta$  159.7, 159.3, 155.0, 153.5, 137.7, 133.9, 103.3, 100.2, 93.3, 92.3, 78.6, 66.5, 60.8, 56.2, 55.5, 55.4, 28.0; FT-IR (neat) 3482, 2998, 2937, 2839, 1619, 1592, 1507, 1458, 1419, 1356, 1236, 1199, 1147, 1124, 1004, 816, 758 ( $\text{cm}^{-1}$ ); HRMS (ESI-TOF) calcd. for  $\text{C}_{20}\text{H}_{24}\text{O}_7$  399.14197  $[\text{M}+\text{Na}]^+$ , found 399.14147.

**methyl 3,4,5-tris(methoxymethoxy)benzoate (S4)**

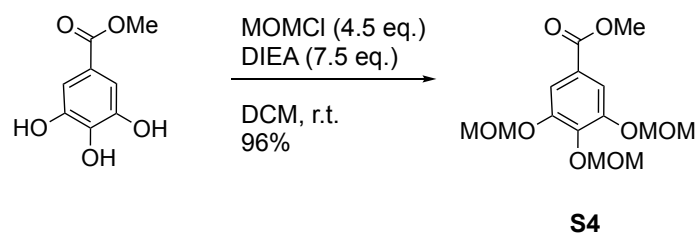

To a stirred solution of methyl 3,4,5-trihydroxybenzoate (1.00 g, 5.43 mmol) in DCM (54 mL) was added DIEA (7.10 mL, 40.7 mmol) and chloro(methoxy)methane (1.86 mL, 24.4 mmol) at 0 °C. After

being stirred at room temperature for 2 h, the reaction mixture was poured into  $\text{NH}_4\text{Cl}$  aq. and EtOAc at  $0^\circ\text{C}$ . The aqueous layer was extracted with ethyl acetate twice. The combined extract was washed with and brine, dried over  $\text{MgSO}_4$ , filtered, and concentrated *in vacuo*. The residue was purified by column chromatography on silica gel with EtOAc/toluene = 7% and was recrystallized from hexane/ EtOAc to give **S4** (1.64 g, 5.21 mmol, 96%).  $^1\text{H}$  NMR (400 MHz,  $\text{CDCl}_3$ )  $\delta$  7.53 (s, 2H), 5.24 (s, 4H), 5.21 (s, 2H), 3.88 (s, 3H), 3.61 (s, 3H), 3.51 (s, 6H);  $^{13}\text{C}$  NMR (400 MHz,  $\text{CDCl}_3$ )  $\delta$  166.3, 150.7, 140.6, 125.9, 111.6, 98.5, 95.2, 57.2, 56.4, 52.2; FT-IR (neat) 2956, 2830, 1721, 1594, 1499, 1435, 1330, 1156, 1079, 1049, 956, 923, 767 ( $\text{cm}^{-1}$ ); HRMS (ESI-TOF) calcd. for  $\text{C}_{14}\text{H}_{20}\text{O}_8$  399.10559  $[\text{M}+\text{Na}]^+$ , found 399.10558.

### 3,4,5-tris(methoxymethoxy)benzoic acid (**S5**)

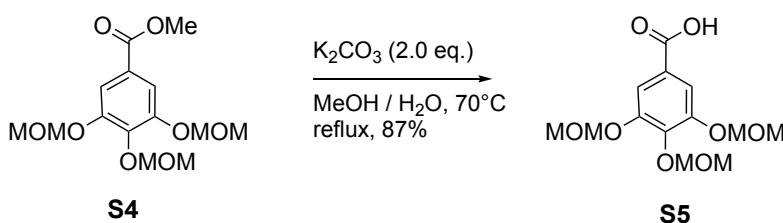

To a stirred solution of **S4** (623 mg, 1.97 mmol) in MeOH (3.20 mL) was added potassium carbonate (544 mg, 3.94 mmol) and water (3.20 mL) at room temperature. After being stirred at  $70^\circ\text{C}$  for 2 h, the reaction mixture was poured into  $\text{NH}_4\text{Cl}$  aq. and EtOAc and 1 M aq. HCl was added until the reaction mixture was acidic at  $0^\circ\text{C}$ . The aqueous layer was extracted with ethyl acetate twice. The combined extract was washed with  $\text{NaHCO}_3$  and brine, dried over  $\text{MgSO}_4$ , filtered, and concentrated *in vacuo*. The residue was recrystallized from hexane/ $\text{CHCl}_3$  to give **S5** (518 mg, 1.71 mmol, 87%).  $^1\text{H}$  NMR (400 MHz,  $\text{CDCl}_3$ )  $\delta$  7.59 (s, 2H), 5.26 (s, 4H), 5.24 (s, 2H), 3.62 (s, 3H), 3.52 (s, 6H);  $^{13}\text{C}$  NMR (400 MHz,  $\text{CDCl}_3$ )  $\delta$  170.5, 150.7, 141.3, 124.8, 112.2, 98.4, 95.3, 57.2, 56.4; FT-IR (neat) 3444, 2965, 2920, 2843, 1686, 1433, 1325, 1151, 1046, 1033, 953, 919, 762 ( $\text{cm}^{-1}$ ); HRMS (ESI-TOF) calcd. for  $\text{C}_{13}\text{H}_{18}\text{O}_8$  325.08994  $[\text{M}+\text{Na}]^+$ , found 325.09015.

### (2*R*,3*R*)-5,7-dimethoxy-2-(3,4,5-trimethoxyphenyl)chroman-3-yl 3,4,5-tris(methoxymethoxy)benzoate (**23**)

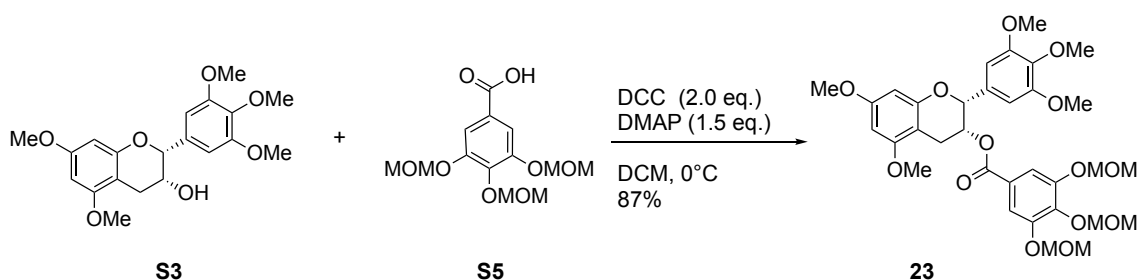

To a stirred solution of **S3** (50.0 mg, 0.133 mol) and **S5** (88.4 mg, 0.292 mmol) in DCM (2.00 mL)

were added DCC (54.8 mg, 0.266 mmol) and DMAP (24.3 mg, 0.199 mmol) at 0 °C. After being stirred at room temperature for 3 h, the reaction mixture was filtered through celite and concentrated *in vacuo*. The residue was purified by column chromatography on silica gel with EtOAc:toluene = 15% to give **23** (98.8mg, 0.150 mmol, 87%).  $[\alpha]_D^{21} -67.12$  (*c* 1.06, CHCl<sub>3</sub>); <sup>1</sup>H NMR (400 MHz, CDCl<sub>3</sub>) δ 7.41 (s, 2H), 6.70 (s, 2H), 6.24 (d, 1H, *J* = 2.8 Hz), 6.11 (d, 1H, *J* = 2.0 Hz), 5.63 (br, 1H), 5.16-5.07 (m, 7H), 3.84 (s, 3H), 3.79 (s, 3H), 3.77 (s, 3H), 3.73 (s, 6H), 3.56 (s, 3H), 3.44 (s, 6), 3.03 (m, 2); <sup>13</sup>C NMR (400 MHz, CDCl<sub>3</sub>) δ 164.7, 159.7, 158.8, 155.4, 153.1, 150.6, 141.2, 137.8, 133.4, 125.7, 112.3, 103.8, 100.0, 98.5, 95.4, 93.2, 91.8, 77.8, 68.7, 60.8, 57.2, 56.3, 56.0, 55.4, 26.0; FT-IR (neat) 2938, 2839, 1716, 1621, 1593, 1506, 1498, 1433, 1361, 1322, 1221, 1188, 1153, 1125, 1048, 949, 924, 765 (cm<sup>-1</sup>); HRMS (ESI-TOF) calcd. for C<sub>33</sub>H<sub>40</sub>O<sub>14</sub> 683.23157 [M+Na]<sup>+</sup>, found 683.23273.

### A gold-catalyzed electrophilic substitution of EGCG with **22a**

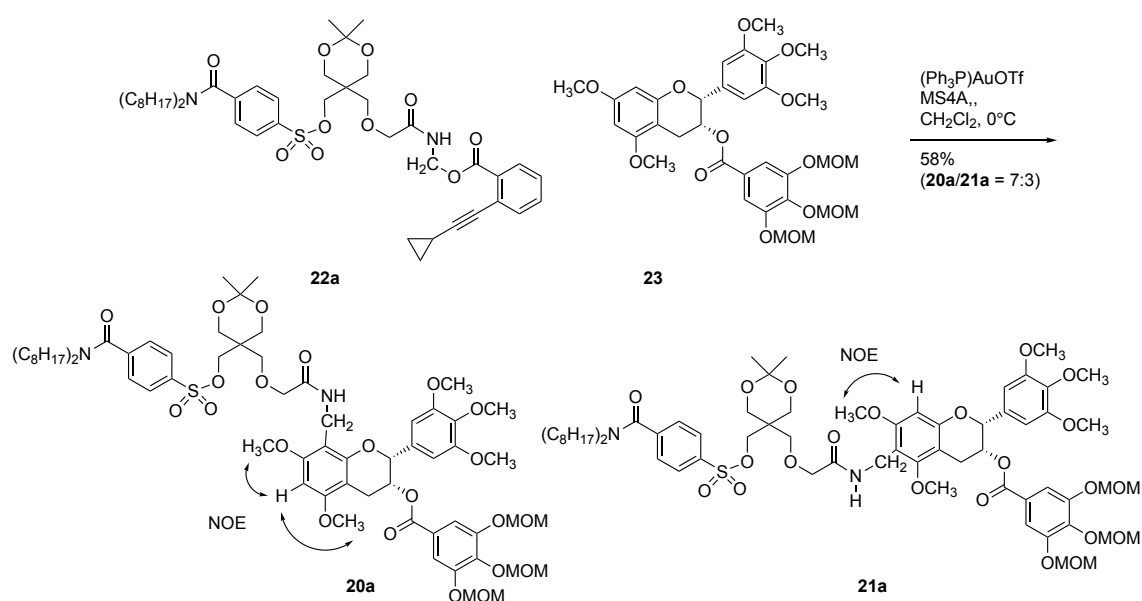

To MS4A (27.8 mg, 2.00 g/mmol) heated by heat gun for 15 min was added **22a** (10.0 mg, 11.9 μmol) and **23** (8.45 mg, 13.1 μmol) in DCM (0.30 mL) at 0 °C. After being stirred at room temperature for 1 h, (PPh<sub>3</sub>)AuOTf (11.9 μL, 11.9 μmol, 1.00 mmol/mL in DCM) was added to the reaction mixture at 0 °C. After being stirred at 0 °C for 10 min, the reaction mixture was filtered through celite, washed by DCM and concentrated *in vacuo*. The residue was purified by a column chromatography on silica gel with EtOAc/toluene (1:1) and further purified by gel permeation chromatography (GPC) to give mixture to give the mixture of (2*R*,3*R*)-8-((2-((5-(((4-(diundecylcarbamoyl)phenyl)sulfonyl)oxy)methyl)-2,2-dimethyl-1,3-dioxan-5-

yl)methoxy)acetamido)methyl)-5,7-dimethoxy-2-(3,4,5-trimethoxyphenyl)chroman-3-yl 3,4,5-tris(methoxymethoxy)benzoate (**20a**) and

(2*R*,3*R*)-6-((2-((5-(((4-(diundecylcarbamoyl)phenyl)sulfonyl)oxy)methyl)-2,2-dimethyl-1,3-dioxan-5-yl)methoxy)acetamido)methyl)-5,7-dimethoxy-2-(3,4,5-trimethoxyphenyl)chroman-3-yl 3,4,5-tris(methoxymethoxy)benzoate (**21a**) (9.60 mg, 6.87  $\mu$ mol, 58%). Then ratio of the mixture was decided by <sup>1</sup>H NMR which showed **20a/21a** = 7/3. Then the mixture was separated by HPLC with ethanol/hexane (1/4) to give **20a** (4.80 mg, 3.43  $\mu$ mol, 29%) and **21a** (1.80 mg, 1.28  $\mu$ mol, 12%).

**20a**:  $[\alpha]_D^{21}$  -18.33 (*c* 0.12, CHCl<sub>3</sub>); <sup>1</sup>H NMR (400 MHz, CDCl<sub>3</sub>)  $\delta$  7.87 (d, 2H, *J* = 8.4 Hz), 7.49 (d, 2H, *J* = 8.4 Hz), 7.35 (s, 2H), 6.79 (m, 3H), 6.14 (s, 1H), 5.64 (br, 1H), 5.20 (br, 1H), 5.14 (s, 2H), 5.12 (d, 4H, *J* = 2.4 Hz), 4.89 (dd, 1H, *J* = 6.6 Hz, 13.8 Hz), 4.46 (dd, 1H, *J* = 4.4 Hz, 14.0 Hz), 4.06 (s, 2H), 3.86 (s, 3H), 3.84 (s, 1H), 3.81 (s, 6H), 3.80 (s, 6H), 3.55 (s, 3H), 3.55-3.52 (m, 2H), 3.48-3.45 (m, 4H), 3.42 (s, 6H), 3.36-3.30 (m, 2H), 3.13-3.04 (m, 4H), 1.34 (br, 4H), 1.26-1.25 (m, 4H), 0.88 (t, 6H, *J* = 6.0 Hz); <sup>13</sup>C NMR (400 MHz, CDCl<sub>3</sub>)  $\delta$  169.3, 167.9, 158.1, 153.2, 153.1, 150.5, 142.9, 136.0, 133.3, 128.1, 127.3, 125.6, 112.0, 105.7, 103.1, 100.3, 98.6, 98.4, 95.4, 88.1, 71.2, 70.0, 69.1, 68.5, 61.8, 61.6, 60.8, 57.2, 56.3, 56.1, 55.9, 55.4, 38.4, 31.9, 29.6, 29.4, 29.3, 29.2, 27.0, 26.6, 25.9, 24.9, 22.7, 21.9, 14.1; FT-IR (neat) 2923, 2852, 1717, 1683, 1636, 1593, 1508, 1457, 1362, 1188, 1154, 1127, 1090, 1047, 954, 800 (cm<sup>-1</sup>); HRMS (ESI-TOF) calcd. for C<sub>75</sub>H<sub>112</sub>N<sub>2</sub>O<sub>22</sub>S 1447.73251 [M+Na]<sup>+</sup>, found 1447.73205; **21a**:  $[\alpha]_D^{21}$  -5.09 (*c* 0.22, CHCl<sub>3</sub>); <sup>1</sup>H NMR (400 MHz, CDCl<sub>3</sub>)  $\delta$  7.91 (d, 2H, *J* = 8.4 Hz), 7.51 (d, 2H, *J* = 8.4 Hz), 7.37 (s, 2H), 6.95 (t, 1H, *J* = 5.6 Hz), 6.68 (s, 2H), 6.44 (s, 1H), 5.64 (br, 1H), 5.16 (s, 2H), 5.13 (d, 4H, *J* = 3.2 Hz), 5.10 (br, 1H), 4.72 (dd, 1H, *J* = 6.2 Hz, 14.2 Hz), 4.36 (dd, 1H, *J* = 5.2 Hz, 14.0 Hz), 4.16 (s, 2H), 3.88 (m, 2H), 3.86 (s, 3H), 3.80 (s, 3H), 3.77 (s, 3H), 3.73 (s, 6H), 3.63-3.59 (m, 4H), 3.56 (s, 3H), 3.43 (s, 6H), 3.42-3.39 (m, 2), 3.15 (br, 2H), 3.11 (t, 2H, *J* = 4.8 Hz), 1.33-1.25 (m, 4H), 0.88 (t, 6H, *J* = 6.2 Hz); <sup>13</sup>C NMR (400 MHz, CDCl<sub>3</sub>)  $\delta$  169.3, 167.9, 157.8, 155.2, 153.2, 150.6, 143.0, 135.9, 133.0, 128.2, 127.4, 112.2, 104.8, 103.8, 98.6, 98.5, 95.9, 95.4, 71.2, 70.1, 69.2, 68.3, 61.8, 61.4, 60.8, 57.2, 56.3, 56.0, 55.8, 38.5, 31.9, 29.6, 29.4, 29.3, 29.2, 27.4, 26.6, 25.0, 22.7, 21.9, 14.1; FT-IR (neat) 2920, 2850, 1731, 1716, 1682, 1635, 1617, 1592, 1507, 1456, 1362, 1187, 1155, 1128, 1107, 1047, 961, 799, 773 (cm<sup>-1</sup>); HRMS (ESI-TOF) calcd. for C<sub>75</sub>H<sub>112</sub>N<sub>2</sub>O<sub>22</sub>S 1447.73251 [M+Na]<sup>+</sup>, found 1447.73357.

## A gold-catalyzed electrophilic substitution of EGCG with **22b**

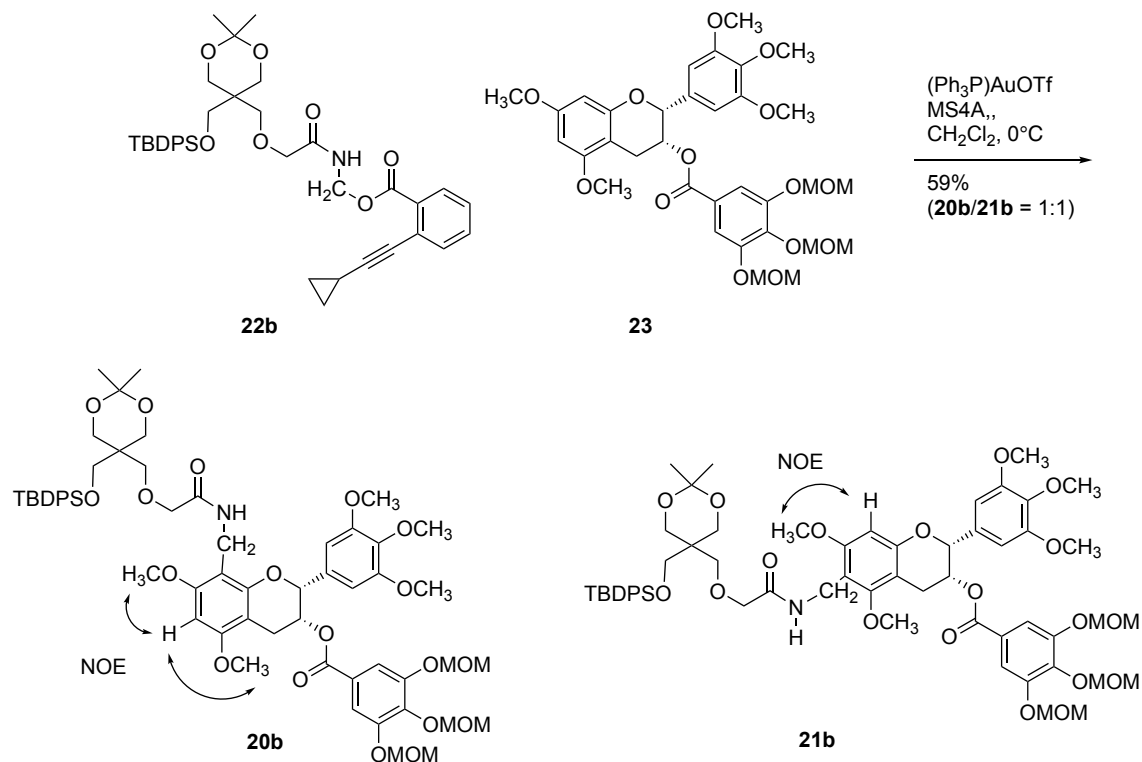

To MS4A (212 mg, 2.00 g/mmol) heated by heat gun for 10min was added **22b** (60.4 mg, 90.0  $\mu\text{mol}$ ) and **23** (64.0 mg, 99.0  $\mu\text{mol}$ ) in DCM (1.80 mL) at  $0^\circ\text{C}$ . After being stirred at room temperature for 1 h,  $(\text{PPh}_3)\text{AuOTf}$  (90.0  $\mu\text{L}$ , 90.0  $\mu\text{mol}$ , 1.00 mmol/mL in DCM) was added to the reaction mixture at  $0^\circ\text{C}$ . After being stirred at  $0^\circ\text{C}$  for 15min, the reaction mixture was filtered through celite, washed by DCM, and concentrated *in vacuo*. The residue was short passed by column chromatography on silica gel with EtOAc : toluene = 50% and further purified by Gel Permeation Chromatography (GPC) to give mixture to give the mixture of (2*R*,3*R*)-8-((2-(((tert-butyl)diphenylsilyl)oxy)methyl)-2,2-dimethyl-1,3-dioxan-5-yl)methoxy)acetamido)methyl)-5,7-dimethoxy-2-(3,4,5-trimethoxyphenyl)chroman-3-yl 3,4,5-tris(methoxymethoxy)benzoate (**20b**) and (2*R*,3*R*)-6-((2-(((tert-butyl)diphenylsilyl)oxy)methyl)-2,2-dimethyl-1,3-dioxan-5-yl)methoxy)acetamido)methyl)-5,7-dimethoxy-2-(3,4,5-trimethoxyphenyl)chroman-3-yl 3,4,5-tris(methoxymethoxy)benzoate (**21b**) (60.8 mg, 53.1  $\mu\text{mol}$ , 59%). Then ratio of the mixture was decided by  $^1\text{H}$  NMR which showed **20b**/**21b** = 1:1. Then the 30.0 mg mixture was separated by HPLC with ethanol/hexane(1/4) to give **20b** (10.4 mg) and **21b** (10.9 mg). **20b**:  $[\alpha]_{\text{D}}^{21}$  -14.81 (*c* 0.52,  $\text{CHCl}_3$ );  $^1\text{H}$  NMR (400 MHz,  $\text{CDCl}_3$ )  $\delta$  7.60-7.51 (m, 4H), 7.38-7.27 (m, 6H), 7.26 (s, 2H), 6.88 (t, 1H,  $J = 4.8$  Hz), 6.61 (s, 2H), 6.00 (s, 1H), 5.49 (br, 1H), 5.07 (s, 2H), 5.04 (s, 2H), 5.03 (s, 2H), 4.90 (m, 2H), 4.31 (dd, 1H,  $J = 4.4\text{Hz}$ , 7.0 Hz), 3.83 (s, 2H), 3.73 (s, 3H), 3.70 (s, 3H), 3.68

(s, 3H), 3.66 (s, 6H), 3.47 (s, 3H), 3.34 (s, 6H), 3.60 (s, 2H), 3.58 (s, 2H), 3.43-3.40 (m, 4H), 3.00 (dd, 1H,  $J = 6.8$  Hz, 17.2 Hz), 2.83 (dd, 1H,  $J = 4.2$  Hz, 17.2 Hz), 1.25 (d, 6H,  $J = 10.8$  Hz), 0.92 (s, 9H);  $^{13}\text{C}$  NMR (400 MHz,  $\text{CDCl}_3$ )  $\delta$  163.6, 157.0, 155.6, 153.9, 152.2, 149.8, 149.7, 149.6, 140.2, 136.6, 134.5, 134.4, 134.3, 131.9, 129.1, 129.0, 126.8, 124.6, 111.4, 110.9, 102.3, 100.3, 97.4, 94.4, 94.3, 88.0, 69.3, 67.4, 63.3, 59.8, 56.2, 55.4, 55.3, 55.2, 55.1, 55.0, 54.8, 54.5, 54.4, 30.9, 30.0, 28.7, 25.8, 25.7, 25.6, 21.6, 18.2, 13.1, 0.00; FT-IR (neat) 2998, 2955, 2928, 2854, 1719, 1659, 1594, 1508, 1463, 1431, 1417, 1358, 1327, 1236, 1222, 1189, 1154, 1128, 1111, 1047, 925, 769, 760, 702 ( $\text{cm}^{-1}$ ); HRMS (ESI-TOF) calcd. for  $\text{C}_{60}\text{H}_{77}\text{NO}_{19}\text{Si}$  1166.47567 [ $\text{M}+\text{Na}$ ] +, found 1166.47537; **21b**:  $[\alpha]_{\text{D}}^{21} -11.70$  ( $c$  0.54,  $\text{CHCl}_3$ );  $^1\text{H}$  NMR (400 MHz,  $\text{CDCl}_3$ )  $\delta$  7.64-7.62 (m, 4H), 7.44-7.32 (m, 6H), 7.37 (s, 2H), 7.02 (t, 1H,  $J = 5.8$  Hz), 6.67 (s, 2H), 6.36 (s, 1H), 5.63 (br, 1H), 5.15 (s, 2H), 5.11 (d, 4H,  $J = 2.8$  Hz), 5.08 (d, 2H,  $J = 3.2$  Hz), 4.67 (dd, 1H,  $J = 6.8$  Hz, 14.3 Hz), 4.35 (dd, 1H,  $J = 4.6$  Hz, 14.3 Hz), 3.90 (s, 2H), 3.80 (s, 3H), 3.76 (s, 2H), 3.74 (s, 3H), 3.72 (s, 6H), 3.66 (s, 2H), 3.64 (s, 3H), 3.56-3.55 (m, 5H), 3.42 (s, 6H), 3.13 (d, 2H,  $J = 2.8$  Hz), 1.36 (s, 6H), 1.02 (s, 9H);  $^{13}\text{C}$  NMR (400 MHz,  $\text{CDCl}_3$ )  $\delta$  164.6, 158.1, 157.7, 155.1, 153.2, 150.6, 141.3, 135.5, 133.0, 132.7, 130.9, 130.0, 129.8, 128.8, 127.8, 127.7, 125.5, 112.2, 103.8, 98.5, 98.2, 95.9, 95.4, 77.9, 77.2, 70.9, 70.6, 68.3, 68.1, 64.4, 64.3, 62.7, 62.4, 61.5, 60.8, 57.2, 56.3, 56.0, 55.5, 45.8, 39.8, 32.4, 31.9, 30.9, 29.7, 26.8, 26.7, 26.3, 23.7, 23.0, 22.7, 19.3, 19.2, 14.1, 1.03; FT-IR (neat) 2994, 2955, 2928, 2855, 1719, 1666, 1592, 1462, 1428, 1361, 1321, 1300, 1220, 1188, 1155, 1129, 1107, 1047, 949, 924, 771, 702 ( $\text{cm}^{-1}$ ); HRMS (ESI-TOF) calcd. for  $\text{C}_{60}\text{H}_{77}\text{NO}_{19}\text{Si}$  1166.47567 [ $\text{M}+\text{Na}$ ] +, found 1166.47553.

## Synthesis of fluorides **30** and **31**

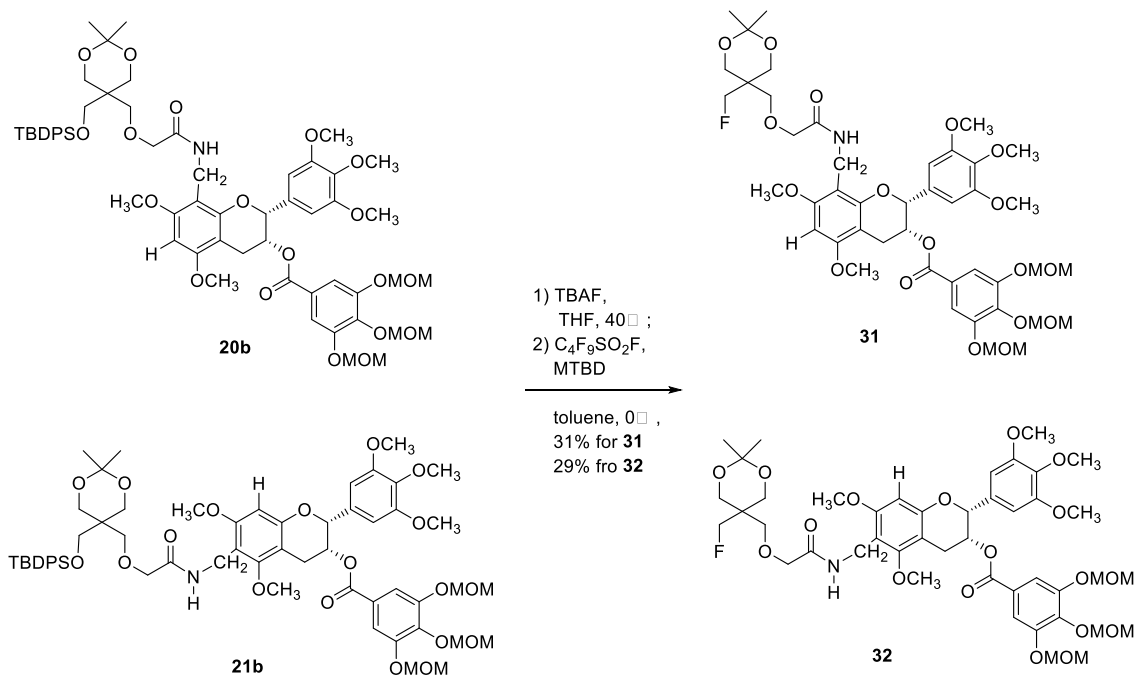

To a stirred solution of the mixture of **20b** and (2*R*,3*R*)-6-((2-((5-(((tert-butyl)diphenylsilyl)oxy)methyl)-2,2-dimethyl-1,3-dioxan-5-yl)methoxy)acetamido)methyl)-5,7-dimethoxy-2-(3,4,5-trimethoxyphenyl)chroman-3-yl 3,4,5-tris(methoxymethoxy)benzoate (**21b**) (420 mg, 367 μmol, 1.0 eq.) in THF (2.00 mL) was added tetra-*n*-butylammonium fluoride (4.40 mL, 4.40 mmol, 12 eq.) at 0 °C. After being stirred at 40 °C for 3 h, the reaction mixture was poured into NH<sub>4</sub>Cl aq. and DCM at 0 °C. The aqueous layer was extracted with DCM twice. The combined extract was washed with brine, dried over MgSO<sub>4</sub>, filtered, and concentrated *in vacuo*. To a stirred solution of the residue in dry toluene (0.210 mL) was added 1-methyl-1,3,4,6,7,8-hexahydro-2H-pyrimido[1,2-*a*]pyrimidine (MTBD) (223 μL, 1.54 mmol) and 1,1,2,2,3,3,4,4,4-nonafluorobutane-1-sulfonyl fluoride (81.3 μL, 463 μmol) at 0 °C. After being stirred at 0 °C for 40 min, the reaction mixture was poured into NH<sub>4</sub>Cl aq. and chloroform at 0 °C. The aqueous layer was extracted with chloroform twice. The combined extract was washed with brine, dried over MgSO<sub>4</sub>, filtered, and concentrated *in vacuo*. The residue was purified by column chromatography on silica gel with EtOAc : chloroform = 2% to give the mixture of (2*R*,3*R*)-8-((2-((5-(fluoromethyl)-2,2-dimethyl-1,3-dioxan-5-yl)methoxy)acetamido)methyl)-5,7-dimethoxy-2-(3,4,5-trimethoxyphenyl)chroman-3-yl 3,4,5-tris(methoxymethoxy)benzoate (**31**) and (2*R*,3*R*)-6-((2-((5-(fluoromethyl)-2,2-dimethyl-1,3-dioxan-5-yl)methoxy)acetamido)methyl)-5,7-dimethoxy-2-(3,4,5-trimethoxyphenyl)chroman-3-yl 3,4,5-tris(methoxymethoxy)benzoate (**32**) (227.3 mg,



231.2  $\mu\text{mol}$ , 63% in 2 steps). Then the mixture was separated by column chromatography on silica gel with hexane/ethyl acetate (3/7) five times to give **31** (112 mg, 112  $\mu\text{mol}$ , 31%) and **32** (104 mg, 106  $\mu\text{mol}$ , 29%). **31**:  $[\alpha]_{\text{D}}^{21}$  -76.18 (*c* 0.38,  $\text{CHCl}_3$ );  $^1\text{H NMR}$  (400 MHz,  $\text{CDCl}_3$ )  $\delta$  7.35 (s, 2H), 6.84 (t, 1H, *J* = 4.4 Hz), 6.78 (s, 2H), 6.13 (s, 1H), 5.64 (br, 1), 5.14 (m, 3H), 5.12 (d, 4H, *J* = 2.4 Hz), 4.93 (dd, 1H, *J* = 7.2 Hz, 14.0 Hz), 4.42 (dd, 1H, *J* = 4.4 Hz, 14.0 Hz), 4.38, 4.26 (m, 2H), 3.94 (s, 2H), 3.87 (s, 3H), 3.82 (s, 3H), 3.81 (s, 3), 3.80 (s, 6H), 3.77-3.75 (m, 2H), 3.64-3.60 (m, 4H), 3.55 (s, 3H), 3.42 (s, 6H), 3.15-2.99 (m, 2H), 1.35 (d, 6H, *J* = 14.8 Hz);  $^{13}\text{C NMR}$  (400 MHz,  $\text{CDCl}_3$ )  $\delta$  168.1, 164.8, 158.1, 157.6, 153.2, 153.0, 150.6, 141.0, 137.5, 133.3, 125.6, 112.3, 112.0, 105.7, 103.1, 100.2, 98.5, 95.3, 88.1, 83.3, 81.6, 77.2, 71.1, 70.3, 68.4, 61.4, 61.3, 60.8, 57.2, 56.3, 56.1, 56.0, 55.9, 55.4, 39.1, 38.9, 31.6, 31.5, 29.7, 25.8, 24.3, 22.7, 14.1;  $^{19}\text{F NMR}$  (376 MHz,  $\text{CDCl}_3$ )  $\delta$  -235.5 (t, 1F, *J* = 47 Hz); FT-IR (neat) 2937, 1716, 1682, 1617, 1594, 1507, 1456, 1360, 1328, 1223, 1154, 1128, 1089, 1048, 947, 925, 767( $\text{cm}^{-1}$ ); HRMS (ESI-TOF) calcd. for  $\text{C}_{44}\text{H}_{58}\text{NO}_{18}$  930.35356  $[\text{M}+\text{Na}]^+$ , found 930.35397; **32**:  $[\alpha]_{\text{D}}^{21}$  -59.04 (*c* 0.25,  $\text{CHCl}_3$ );  $^1\text{H NMR}$  (400 MHz,  $\text{CDCl}_3$ )  $\delta$  7.38 (s, 2H), 7.00 (t, 1H, *J* = 5.8 Hz), 6.68 (s, 2H), 6.44 (s, 1H), 5.64 (br, 1H), 5.16 (s, 2H), 5.13 (d, 4H, *J* = 2.8 Hz), 5.11 (s, 1H), 4.68 (dd, 1H, *J* = 6.8 Hz, 14.0 Hz), 4.48 (d, 2H, *J* = 47.2 Hz), 4.38 (dd, 1H, *J* = 4.8 Hz, 14.0 Hz), 3.94 (s, 2H), 3.87 (s, 3H), 3.81 (s, 3H), 3.77 (s, 3H), 3.73 (m, 10H), 3.56 (s, 3H), 3.48 (br, 2H), 3.43 (s, 6H), 3.15 (d, 2H, *J* = 3.2 Hz), 1.40 (d, 6H, *J* = 4.0 Hz);  $^{13}\text{C NMR}$  (400 MHz,  $\text{CDCl}_3$ )  $\delta$  168.2, 164.6, 158.1, 157.7, 155.2, 153.2, 150.6, 141.3, 137.9, 133.0, 125.5, 112.3, 112.2, 104.8, 103.8, 98.5, 95.8, 95.4, 83.5, 81.8, 77.9, 71.1, 70.4, 68.3, 61.5, 61.4, 60.8, 57.2, 56.3, 56.0, 55.7, 39.3, 39.1, 32.4, 29.7, 26.3, 24.4, 22.7, 14.1;  $^{19}\text{F NMR}$  (376 MHz,  $\text{CDCl}_3$ )  $\delta$  -235.6 (t, 1F, *J* = 47 Hz); FT-IR (neat) 2939, 1717, 1682, 1617, 1521, 1592, 1507, 1456, 1223, 1189, 1155, 1129, 1108, 1089, 1047, 948, 923, 828, 768 ( $\text{cm}^{-1}$ ); HRMS (ESI-TOF) calcd. for  $\text{C}_{44}\text{H}_{58}\text{NO}_{18}$  930.35356  $[\text{M}+\text{Na}]^+$ , found 930.35419.

**(2*R*,3*R*)-8-((2-(3-fluoro-2,2-bis(hydroxymethyl)propoxy)acetamido)methyl)-5,7-dimethoxy-2-(3,4,5-trimethoxyphenyl)chroman-3-yl 3,4,5-trihydroxybenzoate (18)**

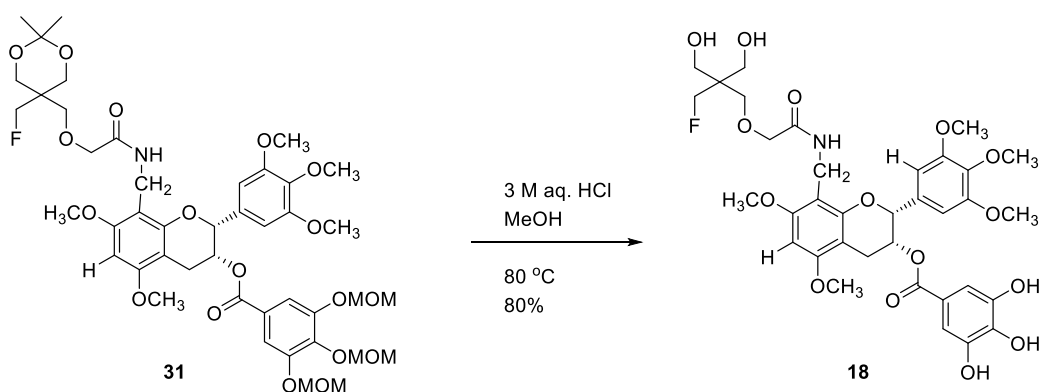

To a stirred solution of the mixture of **31** (18.0 mg, 19.8  $\mu\text{mol}$ ) MeOH (0.30 mL) was added 3 M aq. HCl (0.30 mL) at 0  $^{\circ}\text{C}$ . After being stirred at 80  $^{\circ}\text{C}$  for 5 min, the reaction mixture was purified through solid phase extraction with water : MeOH = 1:1 to give **18** (11.9 mg, 15.8  $\mu\text{mol}$ , 80%).  $[\alpha]_{\text{D}}^{21}$  -8.811 (*c* 0.18, MeOH);  $^1\text{H}$  NMR (400 MHz, MeOD)  $\delta$  6.96 (s, 2H), 6.87 (s, 2H), 6.34 (s, 1H), 5.62 (br, 1H), 5.20 (s, 1H), 4.44-4.32 (m, 4H), 3.95 (s, 2H), 3.92 (s, 3H), 3.87 (s, 3H), 3.73 (s, 6H), 3.71 (s, 3H), 3.52-3.49 (m, 4H), 3.45 (br, 2H), 3.16-2.93 (m, 2H);  $^{13}\text{C}$  NMR (400 MHz, MeOD)  $\delta$  170.4, 165.7, 158.4, 157.8, 152.9, 145.1, 138.4, 137.1, 134.1, 129.1, 119.8, 108.8, 104.7, 103.6, 99.9, 87.9, 83.1, 81.4, 77.6, 69.9, 69.3, 67.8, 59.8, 59.7, 55.1, 54.9, 54.6, 46.0, 31.5, 25.6;  $^{19}\text{F}$  NMR (376 MHz, MeOD)  $\delta$  -239.8 (t, 1F, *J* = 47 Hz); FT-IR (neat) ( $\text{cm}^{-1}$ ) 3419, 2523, 2064, 1645, 1635, 1617, 1456, 1338, 1232, 1127, 1033; HRMS (ESI-TOF) calcd. for  $\text{C}_{35}\text{H}_{42}\text{FNO}_{15}$  758.24362  $[\text{M}+\text{Na}]^+$ , found 758.24517.

**(2*R*,3*R*)-6-((2-(3-fluoro-2,2-bis(hydroxymethyl)propoxy)acetamido)methyl)-5,7-dimethoxy-2-(3,4,5-trimethoxyphenyl)chroman-3-yl 3,4,5-trihydroxybenzoate (19)**

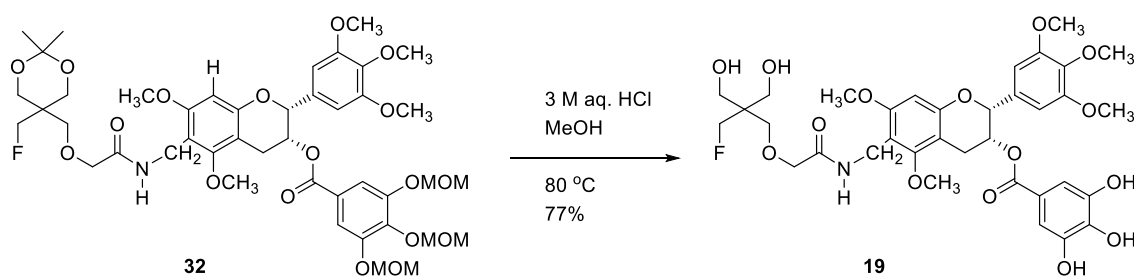

To a stirred solution of the mixture of **32** (12.0 mg, 13.2  $\mu\text{mol}$ ) in MeOH (0.30 mL) was added 3 M aq. HCl (0.30 mL) at 0  $^{\circ}\text{C}$ . After being stirred at 40  $^{\circ}\text{C}$  for 3 h, the reaction mixture was purified through solid phase extraction with water : MeOH = 1:1 to give **19** (7.50 mg, 10.0  $\mu\text{mol}$ , 77%).  $[\alpha]_{\text{D}}^{21}$  +10.76 (*c* 0.31, MeOH);  $^1\text{H}$  NMR (400 MHz, MeOD)  $\delta$  6.95 (s, 2H), 6.82 (s, 2H), 6.51 (s, 1H), 5.63 (br, 1H), 5.22 (s, 1H), 4.55-4.38 (m, 4H), 3.96 (s, 2H), 3.89 (s, 3H), 3.78 (s, 3H), 3.73 (s, 3H), 3.70 (s, 6H), 3.57 (s, 4H), 3.50 (s, 2H), 3.32-3.02 (m, 2H);  $^{13}\text{C}$  NMR (400 MHz, MeOD)  $\delta$  170.3, 165.6, 158.1, 157.9, 155.6, 152.9, 145.1, 138.6, 137.3, 134.1, 119.7, 111.3, 108.7, 104.7, 103.9, 95.6, 83.2, 81.5, 77.8, 69.9, 69.4, 67.7, 60.5, 59.9, 59.7, 55.1, 55.0, 46.1, 45.9, 32.1, 25.8;  $^{19}\text{F}$  NMR (376 MHz, MeOD)  $\delta$  -235.5 (t, 1F, *J* = 47 Hz); FT-IR (neat) ( $\text{cm}^{-1}$ ) 3420, 2064, 1652, 1636, 1617, 1540, 1456, 1420, 1339, 1231, 1128, 1034; HRMS (ESI-TOF) calcd. for  $\text{C}_{35}\text{H}_{42}\text{FNO}_{15}$  758.24362  $[\text{M}+\text{Na}]^+$ , found 758.24413.

## Radiochemistry

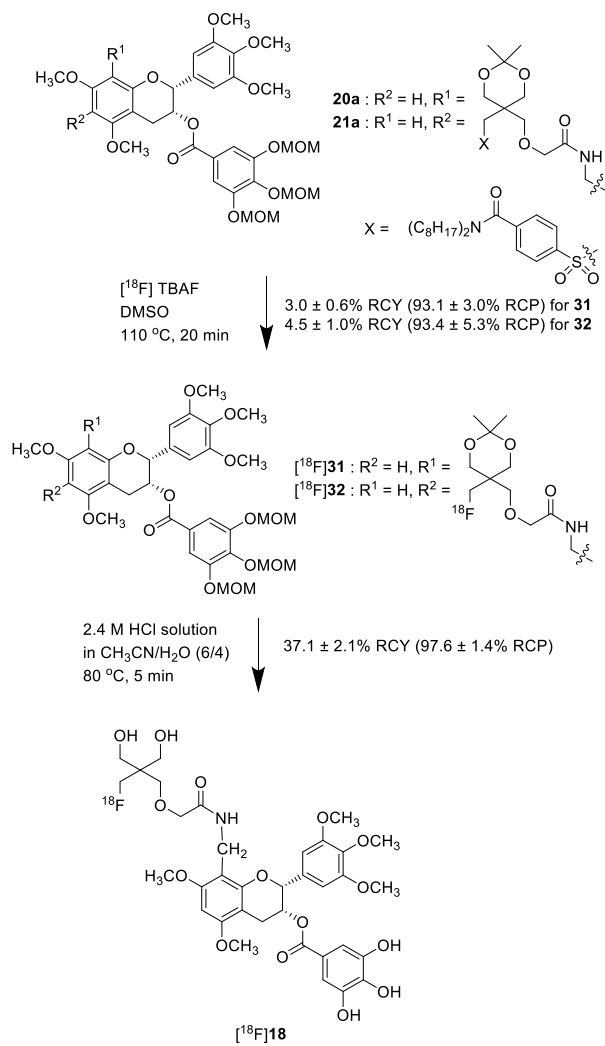

## General

[<sup>18</sup>F]Fluoride ion was produced by proton irradiation of <sup>18</sup>O-enriched water (Taiyo Nippon Sanso, Tokyo, Japan) using an HM-20 cyclotron (Sumitomo Heavy Industries, Tokyo, Japan). Kryptofix® 222 was purchased from Merck (Darmstadt, Germany). Other reagents were purchased from Tokyo Chemical Industry (Tokyo, Japan), Sigma-Aldrich (St. Louis, MO) or FUJIFILM Wako Pure Chemical (Osaka, Japan), unless otherwise stated.

## Radiosynthesis of [<sup>18</sup>F]31 and [<sup>18</sup>F]32

[<sup>18</sup>F]31 and [<sup>18</sup>F]32 were radiosynthesized using an F100 synthesizer (Sumitomo Heavy Industries, Tokyo, Japan) with conventional semi-preparative HPLC equipment. Irradiated <sup>18</sup>O-enriched water containing [<sup>18</sup>F]fluoride (20–25 GBq) was passed through a Sep-Pak Accell Plus QMA Carbonate Plus Light cartridge (washed before use with 1 M KHCO<sub>3</sub> 5.00 mL and then water 8.00 mL; Waters). The trapped [<sup>18</sup>F]fluoride was eluted into a reaction vessel using 50% acetonitrile aqueous solution containing TBAHCO<sub>3</sub> (37.5 mM, 1.00 mL). After the solvent was dried by heating, the residue was azeotropically dried with acetonitrile (1.00 mL). A mixture of **20a** and **21a** in DMSO (2.00 mg/500 μL) was added into the reaction vessel and heated at 110 °C for 20 min. The reaction mixture was mixed with eluent for semi-preparative HPLC (1.00 mL), and then purified by HPLC on a system equipped with a radioactivity detector (Column: Ecripse XDB-C18, 5 μm, 9.4 × 250 mm [Agilent Technologies, Santa Clara, CA]; Eluent: acetonitrile/ethanol/50.0 mM acetic acid/50.0 mM ammonium acetate = 55/5/20/20; Flow rate: 5.00 mL/min; UV: 254 nm). The collected fractions containing [<sup>18</sup>F]31 (retention time = 12 min) or [<sup>18</sup>F]32 (retention time = 14 min) were analysed by analytical HPLC with a radioactivity detector (Column: YMC-Pack ODS-A, 3 μm, 4.6 × 150 mm [YMC, Kyoto, Japan]; Eluent: acetonitrile/50.0 mM acetic acid/50.0 mM ammonium acetate = 60/20/20; Flow rate: 1.00 mL/min; UV: 254 nm).

## LC-MS analysis

Non-radioactive side-products of the <sup>18</sup>F-fluorination reaction for [<sup>18</sup>F]31 and [<sup>18</sup>F]32 were analysed by HRMS using a reaction mixture prepared with a COSMiC-Mini radiosynthesizer (NMP Business Support, Hyogo, Japan). [<sup>18</sup>F]Fluoride (approximately 50.0 MBq) trapped on a Sep-Pak Accell Plus QMA Carbonate Plus Light cartridge (washed before use with 1 M KHCO<sub>3</sub> 5.00 mL and then water 8.00 mL) was eluted into a reaction vessel using 50% acetonitrile aqueous solution containing TBAHCO<sub>3</sub> (37.5 mM, 0.50 mL). After the solvent was dried by heating, the residue was azeotropically dried with acetonitrile (0.50 mL). A mixture of **20a** and **21a** in DMSO (2.00 mg/200 μL) was added into the reaction vessel and heated at 110 °C for 20 min. The reaction mixture was diluted with a 30% acetonitrile aqueous solution (4.00 mL) and then passed through a Sep-Pak C18 Plus Short cartridge (washed before use with ethanol 5.00 mL and water 10.0 mL). After the cartridge was washed with a 30% acetonitrile aqueous solution (4.0 mL), the product was eluted with an 80% acetonitrile aqueous

solution (2.00 mL). LC-MS (electrospray ionization, positive ion mode) analysis of the 80% acetonitrile eluate was conducted using a Q Exactive equipped with an UltiMate 3000 HPLC system (Thermo Fisher Scientific, Waltham, MA). The HPLC was performed under the following conditions: column, Hypersil GOLD C18 (2.1 × 20 mm, 5 μm; Thermo Fisher Scientific); mobile phase, acetonitrile/water/formic acid (50/50/0.1: 0-3 min; 50/50/0.1 to 100/0/0.1: 3-10 min; 100/0/0.1: 10–15 min); flow rate, 0.15 ml/min; and UV, 254 nm.

### **Deprotection of [<sup>18</sup>F]31**

A deprotection study for [<sup>18</sup>F]3 was conducted using a COSMiC-Mini radiosynthesizer with manual interventions. An HPLC fraction containing [<sup>18</sup>F]31 was diluted with water (5.00 mL) and then passed through a Sep-Pak C18 Plus Short cartridge (washed before use with ethanol 5.00 mL and water 10.0 mL). After the cartridge was washed with water (10.0 mL), [<sup>18</sup>F]31 was eluted into a reaction vessel with an 80% acetonitrile aqueous solution (2.00 mL). The eluate was mixed with 5 M aq. HCl (1.80 mL) and heated at 80 °C for 5 min. The vessel was cooled, and the reaction mixture was diluted with water (10.0 mL) and passed through an Oasis HLB Short cartridge (washed before use with ethanol 5 mL and water 10 mL). After the cartridge was washed with water (10.0 mL), [<sup>18</sup>F]18 was eluted with ethanol (2.00 mL) into a product vial containing ascorbic acid injection (250 mg/mL, 2–50 μL). The product solution was analysed by analytical HPLC with a radioactivity detector (Column: PEGASIL C8 SP100, 5 μm, 4.6 × 150 mm [Senshu Scientific, Tokyo, Japan]; Eluent: acetonitrile/water/formic acid = 50/50/0.1 to 100/0/0.1 from 0 min to 5 min, 100/0/0.1 after 5 min; Flow rate: 1.00 mL/min; UV: 254 nm).

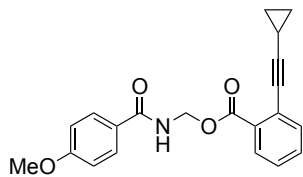

14

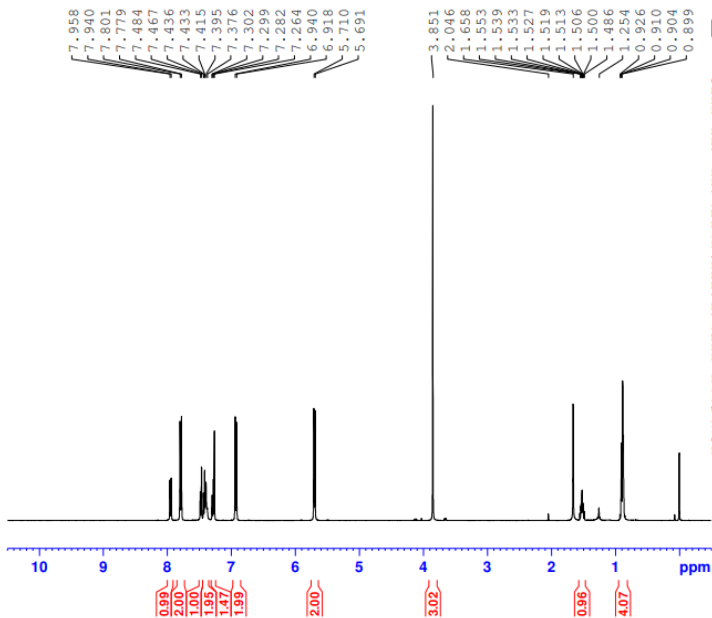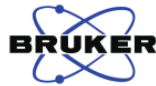

Current Data Parameters  
 NAME liu-20211005-c-37-4nd  
 EXPNO 10  
 PROCNO 1

F2 - Acquisition Parameters  
 Date\_ 20211005  
 Time 19.40 h  
 INSTRUM Spect  
 PROBRD Z108618\_0934 ( )  
 PULPROG zg30  
 TD 65536  
 SOLVENT CDCl3  
 NS 16  
 DS 2  
 SWH 8012.820 Hz  
 FIDRES 0.244532 Hz  
 AQ 4.0894465 sec  
 RG 180.02  
 DW 62.400 usec  
 DE 6.50 usec  
 TE 296.2 K  
 D1 1.00000000 sec  
 TDO 1  
 SFO1 400.0324702 MHz  
 NUC1 1H  
 FI 14.00 usec  
 FLW1 13.0000000 W

F2 - Processing parameters  
 SI 65536  
 SF 400.0300071 MHz  
 WDW EM  
 SSB 0  
 LB 0.30 Hz  
 GB 0  
 PC 1.00

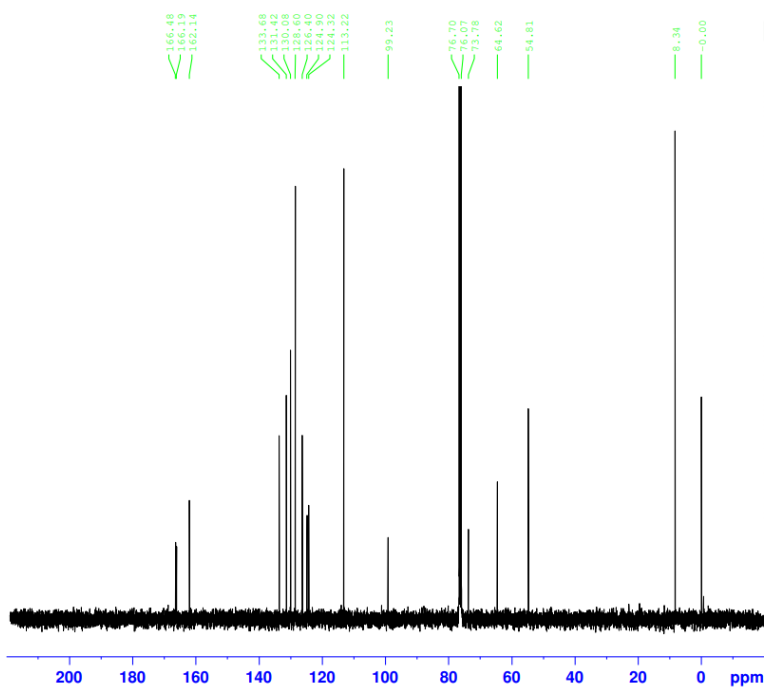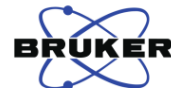

Current Data Parameters  
 NAME liu-20211005-c-37-4nd-13C  
 EXPNO 10  
 PROCNO 1

F2 - Acquisition Parameters  
 Date\_ 20211005  
 Time 20.14 h  
 INSTRUM Spect  
 PROBRD Z108618\_0934 ( )  
 PULPROG zgpg30  
 TD 65536  
 SOLVENT CDCl3  
 NS 567  
 DS 4  
 SWH 24038.461 Hz  
 FIDRES 0.733596 Hz  
 AQ 1.3631488 sec  
 RG 201.24  
 DW 20.800 usec  
 DE 6.50 usec  
 TE 297.1 K  
 D1 2.00000000 sec  
 D11 0.03000000 sec  
 TDO 1  
 SFO1 100.5976823 MHz  
 NUC1 13C  
 FI 10.00 usec  
 FLW1 51.00500107 W  
 SFO2 400.0316001 MHz  
 NUC2 1H  
 CPDPRG2 wait16  
 FCPD 90.00 usec  
 FLW2 13.00000000 W  
 FLW12 0.11457001 W  
 FLW13 0.15823001 W

F2 - Processing parameters  
 SI 32768  
 SF 100.5876885 MHz  
 WDW EM  
 SSB 0  
 LB 1.00 Hz  
 GB 0  
 PC 1.40

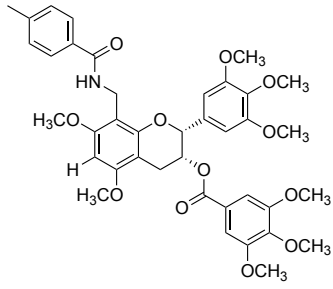

16

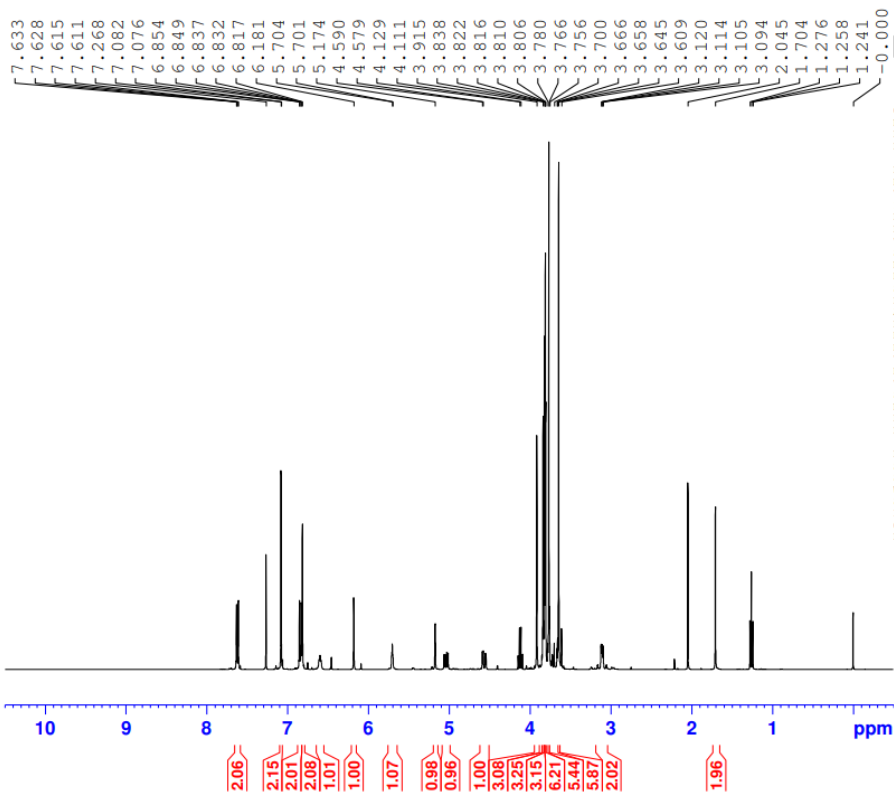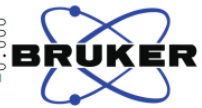

Current Data Parameters  
 NAME 11u-20210908-C-36-1st-up  
 EXPNO 10  
 PROCNO 1

F2 - Acquisition Parameters  
 Date\_ 20210908  
 Time 16.51 h  
 INSTRUM Spect  
 PRBHD Z108618\_0934 (4  
 PULPROG zg30  
 TD 65536  
 SOLVENT CDCl3  
 NS 16  
 DS 2  
 SWH 8012.820 Hz  
 FIDRES 0.244532 Hz  
 AQ 4.8894465 sec  
 RG 112.25  
 DW 62.400 usec  
 DE 6.50 usec  
 TE 296.3 K  
 D1 1.00000000 sec  
 TD0 1  
 SFO1 400.0324702 MHz  
 NUC1 1H  
 P1 14.00 usec  
 PLW1 13.00000000 W

F2 - Processing parameters  
 SI 65536  
 SF 400.0300057 MHz  
 WDW EM  
 SSB 0  
 LB 0.30 Hz  
 GB 0  
 PC 1.00

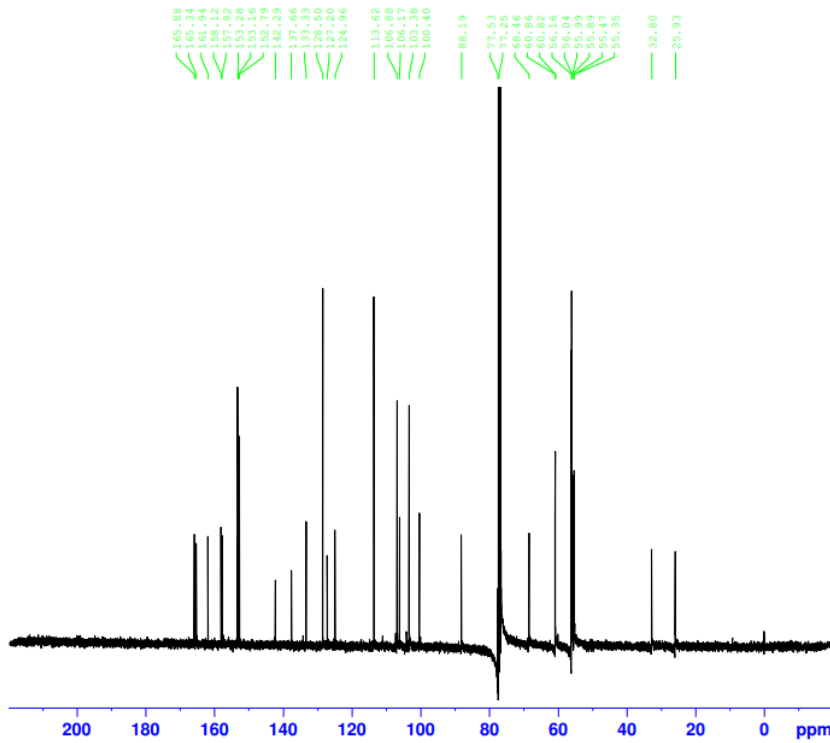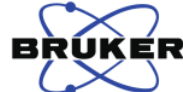

Current Data Parameters  
 NAME 11u-20210908-c-36-1st-up-13c  
 EXPNO 20  
 PROCNO 1

F2 - Acquisition Parameters  
 Date\_ 20210908  
 Time 21.12 h  
 INSTRUM Spect  
 PROBRD 2108618\_0934 ( )  
 PULPROG zgpg30  
 TD 65536  
 SOLVENT CDCl3  
 NS 2048  
 DS 4  
 SWH 24038.461 Hz  
 FIDRES 0.733996 Hz  
 AQ 1.3631488 sec  
 RG 201.24  
 DW 20.800 usec  
 DE 6.50 usec  
 TE 297.3 K  
 D1 2.0000000 sec  
 D11 0.0300000 sec  
 TDO 1  
 SFO1 100.5976823 MHz  
 NUC1 13C  
 P1 10.00 usec  
 PLW1 51.00500107 W  
 SFO2 400.0316001 MHz  
 NUC2 1H  
 CPDPRG2 waitr16  
 P2 80.00 usec  
 PLW2 13.00000000 W  
 PLW12 0.31457001 W  
 PLW13 0.15823001 W

F2 - Processing parameters  
 SI 32768  
 SF 100.5976235 MHz  
 WDW EM  
 SSB 0  
 LB 1.00 Hz  
 GB 0  
 PC 1.40

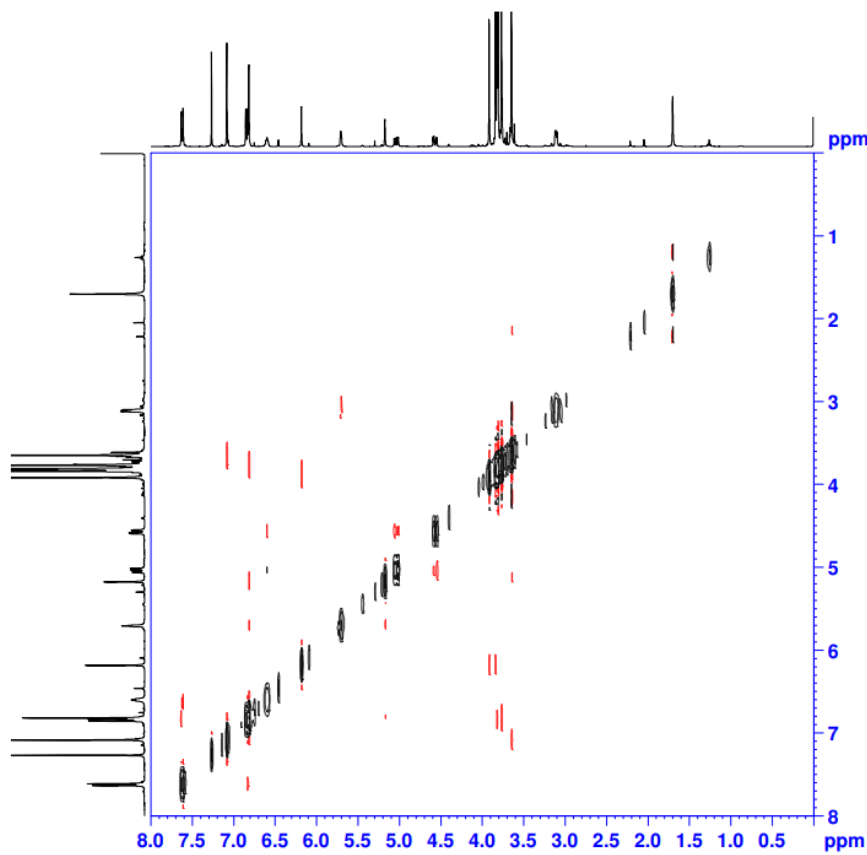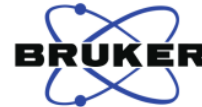

Current Data Parameters  
 NAME 11u-20210908-c-36-1st-up-noesy  
 EXPNO 20  
 PROCNO 1

F2 - Acquisition Parameters  
 Date\_ 20210908  
 Time 21.26 h  
 INSTRUM Spect  
 PROBRD 2108618\_0934 ( )  
 PULPROG noesyppgpp  
 TD 2048  
 SOLVENT CDCl3  
 NS 256  
 DS 32  
 SWH 3424.657 Hz  
 FIDRES 3.344392 Hz  
 AQ 0.2990080 sec  
 RG 60.63  
 DW 146.000 usec  
 DE 6.50 usec  
 TE 296.5 K  
 D0 0.00012817 sec  
 D1 1.95699203 sec  
 D8 0.30000001 sec  
 D11 0.03000000 sec  
 D12 0.00002000 sec  
 D16 0.00020000 sec  
 INO 0.00029200 sec  
 TDAV 1  
 SFO1 400.0318065 MHz  
 NUC1 1H  
 P1 14.00 usec  
 F2 28.00 usec  
 P17 2500.00 usec  
 PLW1 13.00000000 W  
 PLW10 2.83109999 W  
 GPNAM(1) SMSQ10.100  
 GPE1 40.00 %  
 F16 1000.00 usec

F1 - Acquisition parameters  
 TD 75  
 SFO1 400.0318 MHz  
 FIDRES 91.324203 Hz  
 SW 8.561 ppm  
 F2MODE States-TFPI

F2 - Processing parameters  
 SI 1024  
 SF 400.0300064 MHz  
 WDW QSI  
 SSB 2  
 LB 0 Hz  
 GB 0  
 PC 1.00

F1 - Processing parameters  
 SI 1024  
 NUC2 States-TFPI  
 SF 400.0300064 MHz  
 WDW QSI  
 SSB 2  
 LB 0 Hz  
 GB 0



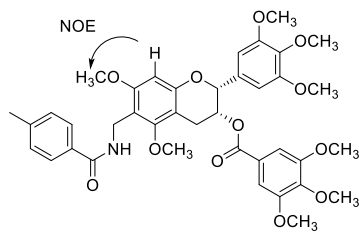

17

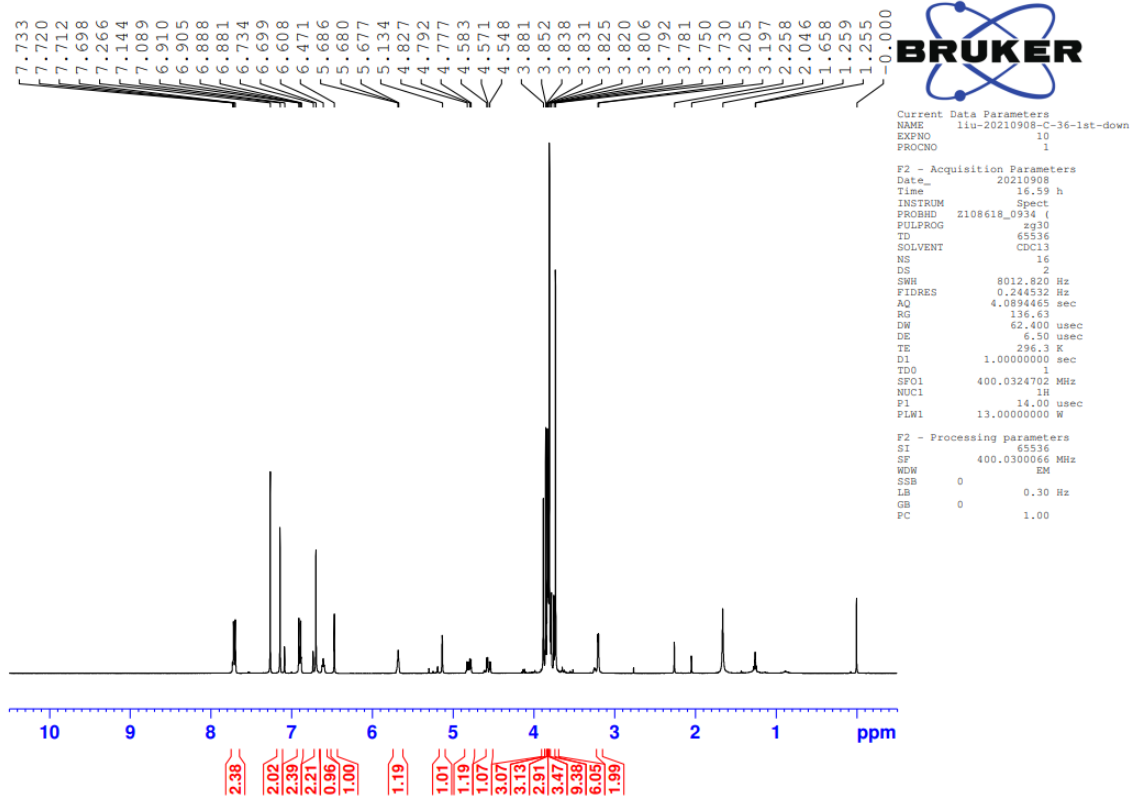

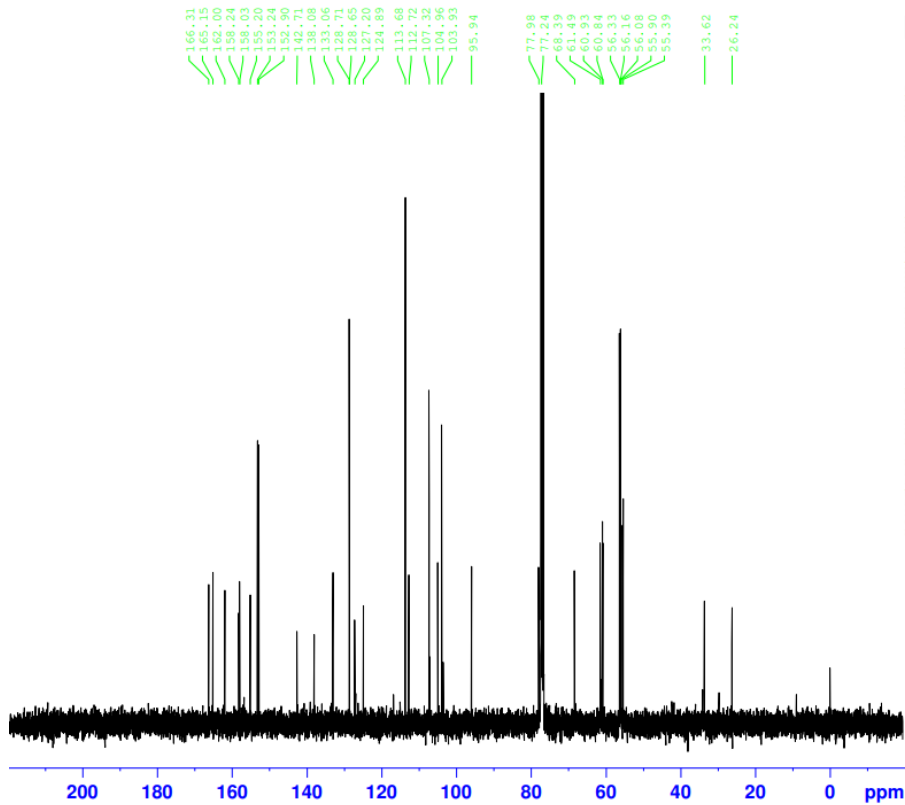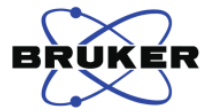

Current Data Parameters  
 NAME 11u-20210908-C-16-1st-down-13C  
 EXPNO 10  
 PROCNO 1

F2 - Acquisition Parameters  
 Date\_ 20210908  
 Time 18:27 h  
 INSTRUM spect  
 FPROGHD z108618\_0934 (   
 FULPROG zgpg30  
 TD 65536  
 SOLVENT CDCl3  
 NS 4  
 DS 4  
 SWH 24038.461 Hz  
 FIDRES 0.733596 Hz  
 AQ 1.3621488 sec  
 RG 201.24  
 DW 20.800 usec  
 DE 6.50 usec  
 TE 297.3 K  
 D1 2.00000000 sec  
 D11 0.03000000 sec  
 TD0 1  
 SFO1 100.597623 MHz  
 NUC1 13C  
 F1 10.00 usec  
 PLW1 51.0050107 W  
 SFO2 400.0316001 MHz  
 NUC2 1H  
 CFCPRG2 waltz16  
 FCPD2 90.00 usec  
 PLW2 13.00000000 W  
 PLW3 0.31457001 W  
 PLW13 0.15823001 W

F2 - Processing parameters  
 SI 32768  
 SF 100.5976230 MHz  
 WDW EM  
 SSB 0  
 LB 1.00 Hz  
 GB 0  
 FC 1.40

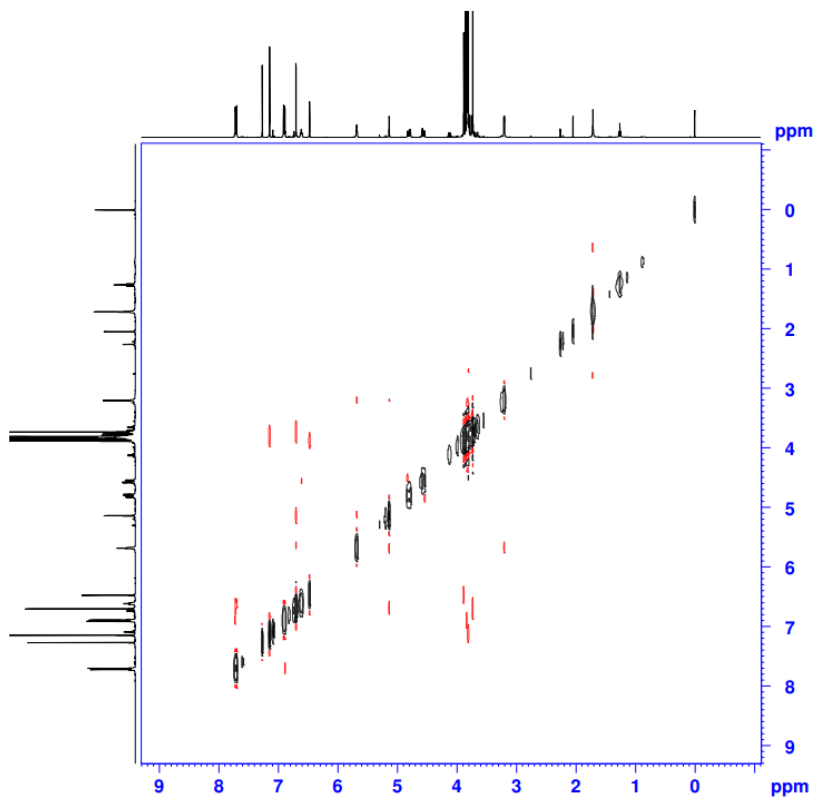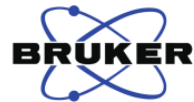

Current Data Parameters  
 NAME 11u-20210908-C-16-1st-down-noisy-overwighk  
 EXPNO 20  
 PROCNO 2

F2 - Acquisition Parameters  
 Date\_ 20210909  
 Time 21:12 h  
 INSTRUM spect  
 FPROGHD z108618\_0934 (   
 FULPROG zgpg30  
 TD 65536  
 SOLVENT CDCl3  
 NS 216  
 DS 32  
 SWH 4166.487 Hz  
 FIDRES 4.048910 Hz  
 AQ 0.2437800 sec  
 RG 80.03  
 DW 120.000 usec  
 DE 6.50 usec  
 TE 298.3 K  
 D0 0.0001217 sec  
 D1 2.0324018 sec  
 D8 0.3000001 sec  
 D12 0.03000000 sec  
 D16 0.00020000 sec  
 D24 0.00020000 sec  
 D48 0.00020000 sec  
 TDelv 0.00020000 sec

F1 - Acquisition parameters  
 TD 81  
 SFO1 400.0316 MHz  
 FIDRES 172.880461 Hz  
 SW 10.416 ppm  
 FWHOLE State=TSF1

F2 - Processing parameters  
 SI 1624  
 SF 400.0300216 MHz  
 WDW QFTM  
 SSB 2  
 LB 0 Hz  
 GB 0  
 FC 1.00

F1 - Processing parameters  
 SI 1024  
 State=TSF2  
 SF 400.0300216 MHz  
 WDW QFTM  
 SSB 2  
 LB 0 Hz  
 GB 0

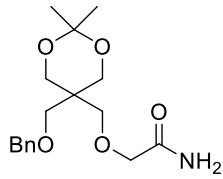

25

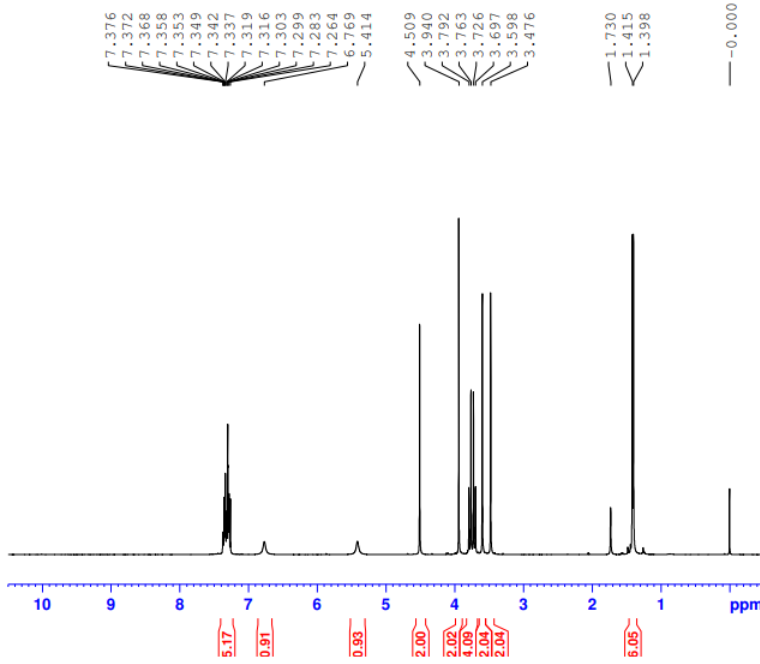

**BRUKER**

Current Data Parameters  
 NAME liu-20210401-d-1H  
 EXPNO 10  
 PROCNO 1

F2 - Acquisition Parameters  
 Date\_ 20210401  
 Time 16.14 h  
 INSTRUM Spect  
 PROBHD Z108618\_0934 (  
 PULPROG zg30  
 TD 65536  
 SOLVENT CDCl3  
 NS 16  
 DS 2  
 SWH 8012.820 Hz  
 FIDRES 0.244532 Hz  
 AQ 4.0894465 sec  
 RG 121.35  
 DW 62.400 usec  
 DE 6.50 usec  
 TE 296.3 K  
 D1 1.00000000 sec  
 TD0 1  
 SFO1 400.0324702 MHz  
 NUC1 1H  
 P1 14.00 usec  
 PLW1 13.00000000 W

F2 - Processing parameters  
 SI 65536  
 SF 400.0300073 MHz  
 WDW EM  
 SSB 0  
 LB 0.30 Hz  
 GB 0  
 PC 1.00

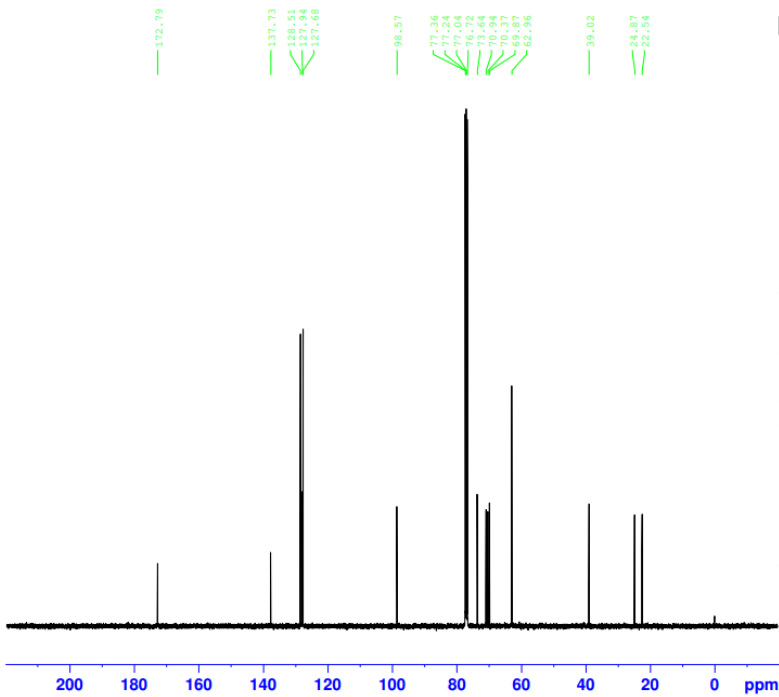

**BRUKER**

Current Data Parameters  
 NAME liu-20210401-d-13C  
 EXPNO 20  
 PROCNO 1

F2 - Acquisition Parameters  
 Date\_ 20210401  
 Time 19.02 h  
 INSTRUM Spect  
 PROBHD Z108618\_0934 (  
 PULPROG zgpg30  
 TD 65536  
 SOLVENT CDCl3  
 NS 866  
 DS 4  
 SWH 24038.461 Hz  
 FIDRES 0.733596 Hz  
 AQ 1.3631488 sec  
 RG 201.24  
 DW 20.800 usec  
 DE 6.50 usec  
 TE 297.4 K  
 D1 2.00000000 sec  
 D11 0.03000000 sec  
 TD0 1  
 SFO1 100.5976823 MHz  
 NUC1 13C  
 P1 10.00 usec  
 PLW1 51.00500107 W  
 SFO2 400.0316001 MHz  
 NUC2 1H  
 CPDPRG2 waltz16  
 FCF2 90.00 usec  
 PLW2 13.00000000 W  
 PLW12 0.31457001 W  
 PLW13 0.15823001 W

F2 - Processing parameters  
 SI 32768  
 SF 100.5876235 MHz  
 WDW EM  
 SSB 0  
 LB 1.00 Hz  
 GB 0  
 PC 1.40

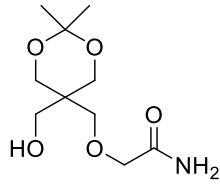

26

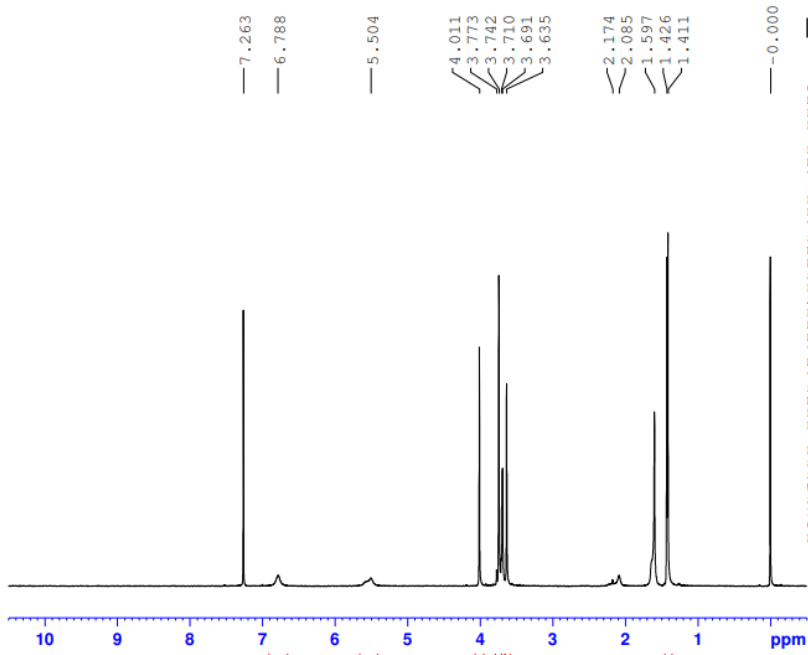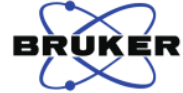

Current Data Parameters  
 NAME 1iu-20210401-e3-1H  
 EXPNO 10  
 PROCNO 1

F2 - Acquisition Parameters  
 Date\_ 20210401  
 Time 19.08 h  
 INSTRUM Spect  
 PROBHD Z108618\_0934 ( )  
 PULPROG zg30  
 TD 65536  
 SOLVENT CDC13  
 NS 16  
 DS 2  
 SWH 8012.820 Hz  
 FIDRES 0.244532 Hz  
 AQ 4.0894465 sec  
 RG 201.24  
 DW 62.400 usec  
 DE 6.50 usec  
 TE 296.8 K  
 D1 1.00000000 sec  
 TDO 1  
 SFO1 400.0324702 MHz  
 NUC1 1H  
 P1 14.00 usec  
 PLW1 13.00000000 W

F2 - Processing parameters  
 SI 65536  
 SF 400.0300075 MHz  
 WDW EM  
 SSB 0  
 LB 0.30 Hz  
 GB 0  
 PC 1.00

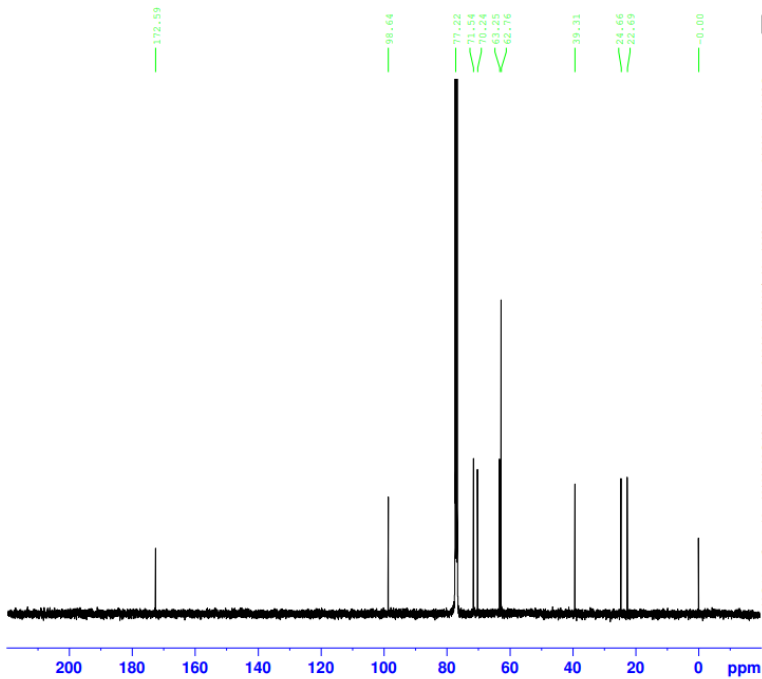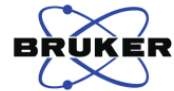

Current Data Parameters  
 NAME 1iu-20210401-e3-13C  
 EXPNO 11  
 PROCNO 1

F2 - Acquisition Parameters  
 Date\_ 20210402  
 Time 10.39 h  
 INSTRUM Spect  
 PROBHD Z108618\_0934 ( )  
 PULPROG zgpg30  
 TD 65536  
 SOLVENT CDC13  
 NS 15505  
 DS 4  
 SWH 24038.461 Hz  
 FIDRES 0.733596 Hz  
 AQ 1.3631488 sec  
 RG 201.24  
 DW 20.800 usec  
 DE 6.50 usec  
 TE 297.3 K  
 D1 2.00000000 sec  
 D11 0.03000000 sec  
 TDO 1  
 SFO1 100.5976823 MHz  
 NUC1 13C  
 P1 10.00 usec  
 PLW1 51.00500107 W  
 SFO2 400.0316001 MHz  
 NUC2 1H  
 CDPFRG[2] waltz16  
 PCFBD 90.00 usec  
 PLW2 13.00000000 W  
 PLW12 0.31457001 W  
 PLW13 0.15823001 W

F2 - Processing parameters  
 SI 32768  
 SF 100.5876239 MHz  
 WDW EM  
 SSB 0  
 LB 1.00 Hz  
 GB 0  
 PC 1.40

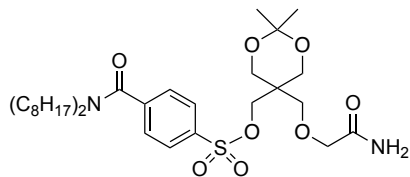

28

7.957  
7.936  
7.541  
7.521  
7.269  
6.342  
5.799  
4.134  
4.113  
3.888  
3.709  
3.678  
3.646  
3.502  
3.487  
3.465  
3.142  
3.124  
3.105  
2.124  
2.056  
2.046  
1.733  
1.658  
1.507  
1.489  
1.473  
1.426  
1.412  
1.380  
1.351  
1.269

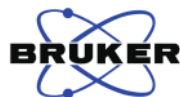

Current Data Parameters  
NAME liu-20210217-c-31-1st-2  
EXPNO 10  
PROCNO 1

F2 - Acquisition Parameters  
Date\_ 20210217  
Time 14:50 h  
INSTRUM Spect  
PROBHD Z108618\_0934 ( )  
PULPROG zg30  
TD 65536  
SOLVENT CDCl3  
NS 16  
DS 2  
SWH 8012.820 Hz  
FIDRES 0.244532 Hz  
AQ 4.0894465 sec  
RG 79.31  
DM 62.400 usec  
DE 6.50 usec  
TE 296.6 K  
D1 1.00000000 sec  
TDO 1  
SFO1 400.0324702 MHz  
NUC1 1H  
P1 14.00 usec  
PLM1 13.00000000 W

F2 - Processing parameters  
SI 65536  
SF 400.0300048 MHz  
WDW EM  
SSB 0  
LB 0.30 Hz  
GB 0  
PC 1.00

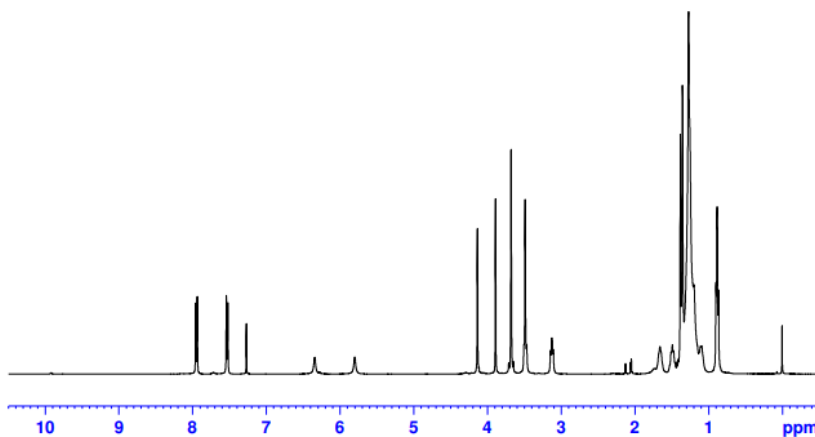

171.64  
169.38  
145.11  
135.66  
128.28  
127.41  
98.90  
77.35  
77.24  
77.03  
70.81  
69.94  
62.03  
49.01  
38.63  
31.91  
29.61  
29.42  
29.35  
28.72  
27.45  
26.58  
24.15  
22.80  
14.12

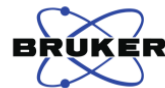

Current Data Parameters  
NAME liu-20210217-c-31-1st-2-13c  
EXPNO 10  
PROCNO 1

F2 - Acquisition Parameters  
Date\_ 20210217  
Time 15:26 h  
INSTRUM Spect  
PROBHD Z108618\_0934 ( )  
PULPROG zgpg30  
TD 65536  
SOLVENT CDCl3  
NS 4  
DS 4  
SWH 24038.461 Hz  
FIDRES 0.732996 Hz  
AQ 1.3631488 sec  
RG 201.24  
DM 20.800 usec  
DE 6.50 usec  
TE 297.3 K  
D1 2.00000000 sec  
D11 0.03000000 sec  
TDO 1  
SFO1 100.5976823 MHz  
NUC1 13C  
P1 10.00 usec  
PLM1 51.00506107 W  
SFO2 400.0316001 MHz  
NUC2 1H  
CHPROG2 waltz16  
PCPD2 90.00 usec  
PLM2 13.00000000 W  
PLM3 0.31457001 W  
PLM3 0.15823001 W

F2 - Processing parameters  
SI 32768  
SF 100.5876235 MHz  
WDW EM  
SSB 0  
LB 1.00 Hz  
GB 0  
PC 1.40

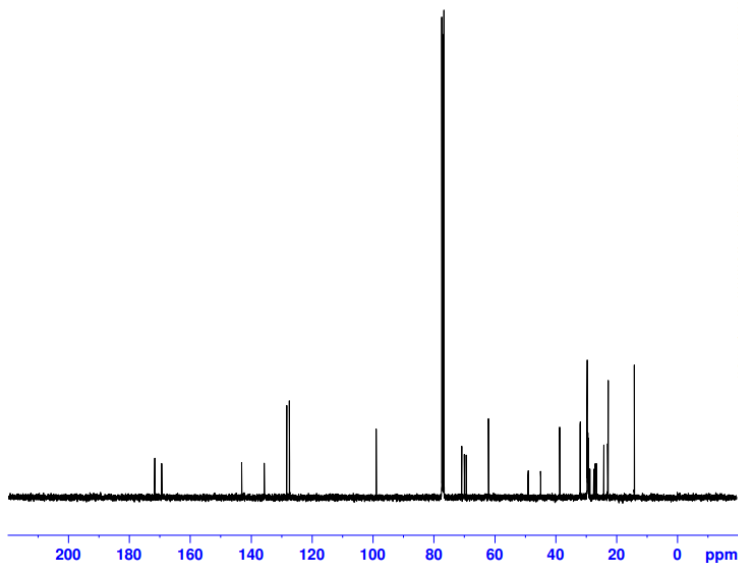

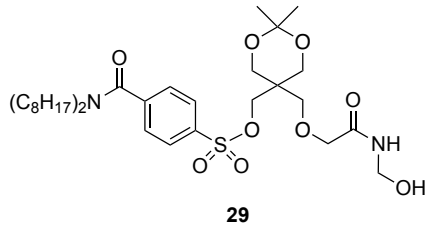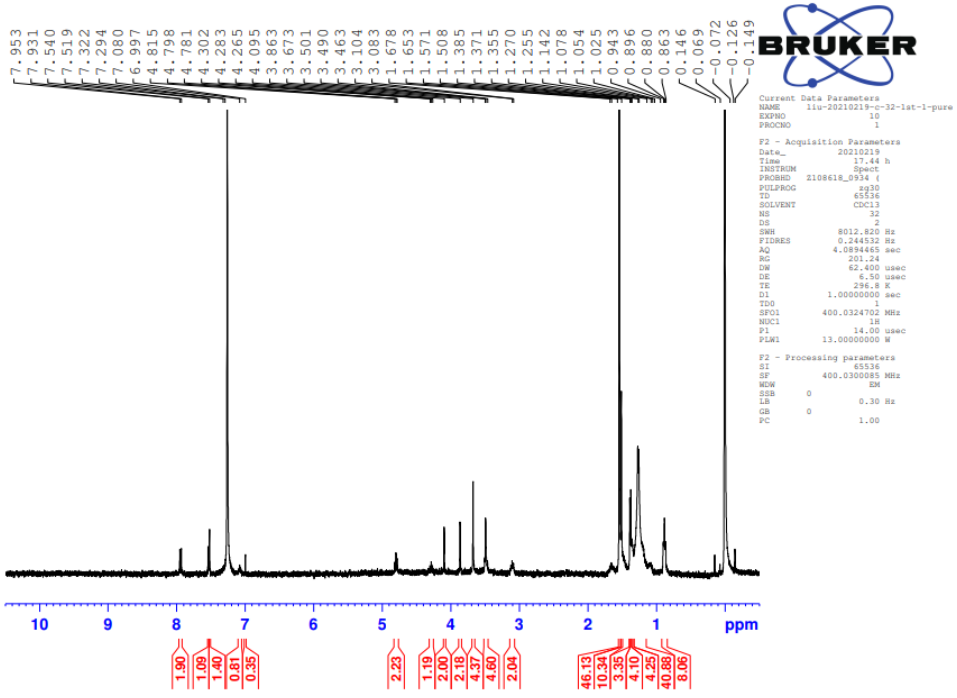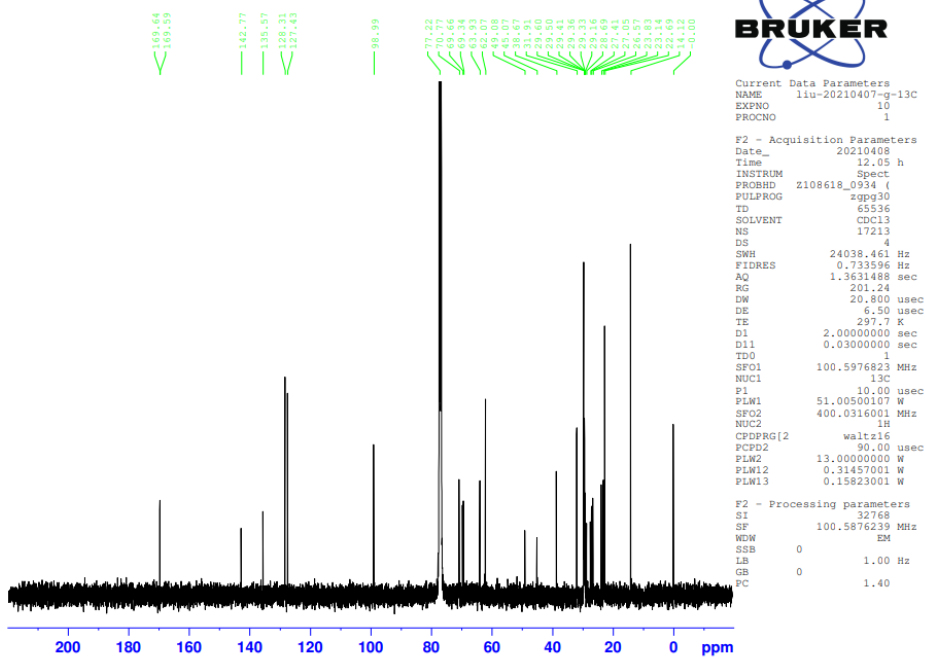

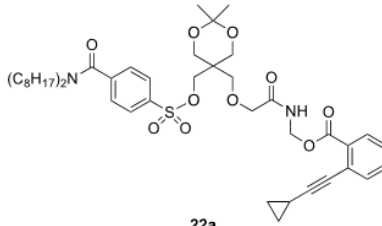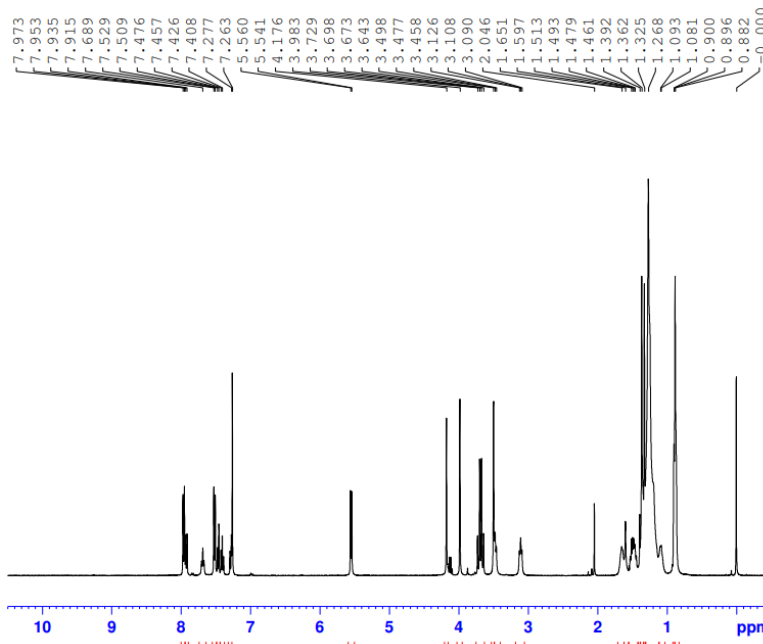

**BRUKER**

Current Data Parameters  
 NAME 11u-20210222-c-33-1st-3  
 EXPNO 10  
 PROCNO 1

F2 - Acquisition Parameters  
 Date\_ 20210222  
 Time 17.41 h  
 INSTRUM Spect  
 FPROG Z108618\_0334 f  
 PULPROG zg30  
 TD 65536  
 SOLVENT CDCl3  
 NS 16  
 DS 2  
 SWH 8012.820 Hz  
 FIDRES 0.244532 Hz  
 AQ 4.0894465 sec  
 RG 157.94  
 DW 62.400 usec  
 DE 6.50 usec  
 TE 296.9 K  
 D1 1.0000000 sec  
 TDO 1  
 SFO1 400.0324702 MHz  
 NUC1 1H  
 P1 14.00 usec  
 PLW1 13.0000000 W

F2 - Processing parameters  
 SI 65536  
 SF 400.0300073 MHz  
 NMR EM  
 SSB 0  
 LB 0.30 Hz  
 GB 0  
 PC 1.00

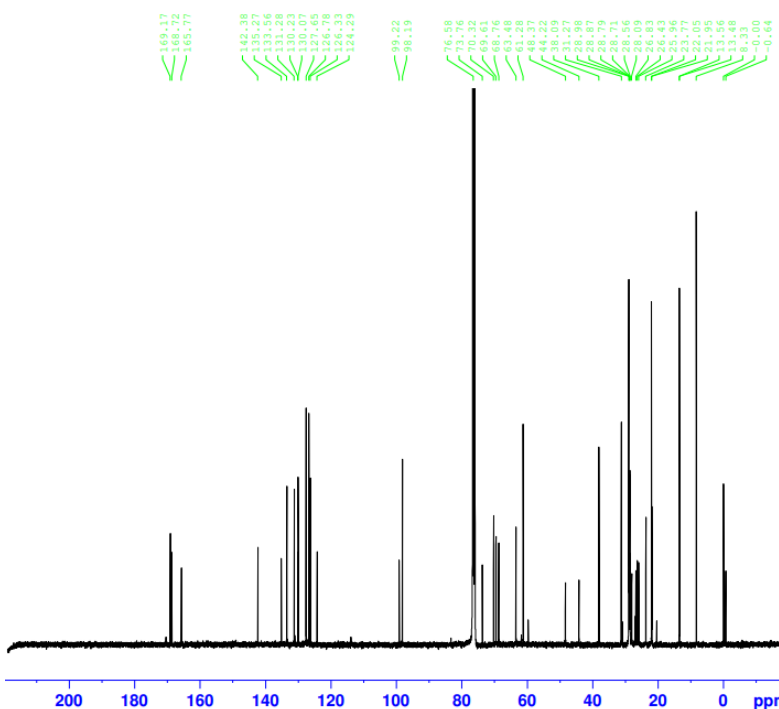

**BRUKER**

Current Data Parameters  
 NAME 11u-20210222-c-33-1st-3-13C  
 EXPNO 10  
 PROCNO 1

F2 - Acquisition Parameters  
 Date\_ 20210224  
 Time 13.39 h  
 INSTRUM Spect  
 FPROG Z108618\_0334 f  
 PULPROG zgpg30  
 TD 65536  
 SOLVENT CDCl3  
 NS 4  
 DS 4  
 SWH 24038.461 Hz  
 FIDRES 0.733996 Hz  
 AQ 1.3631488 sec  
 RG 201.24  
 DW 20.800 usec  
 DE 6.50 usec  
 TE 297.8 K  
 D1 2.0000000 sec  
 D11 0.0300000 sec  
 TDO 1  
 SFO1 100.5976823 MHz  
 NUC1 13C  
 P1 10.00 usec  
 PLW1 51.0050107 W  
 SFO2 400.0316001 MHz  
 NUC2 1H  
 CPDPRG2 waltz16  
 PCPD 90.00 usec  
 PLW2 13.0000000 W  
 PLW3 0.3145700 W  
 PLW13 0.15823001 W

F2 - Processing parameters  
 SI 32768  
 SF 100.5876881 MHz  
 NMR EM  
 SSB 0  
 LB 1.00 Hz  
 GB 0  
 PC 1.40

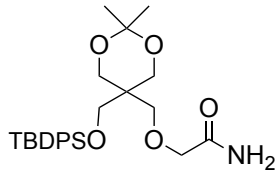

S1

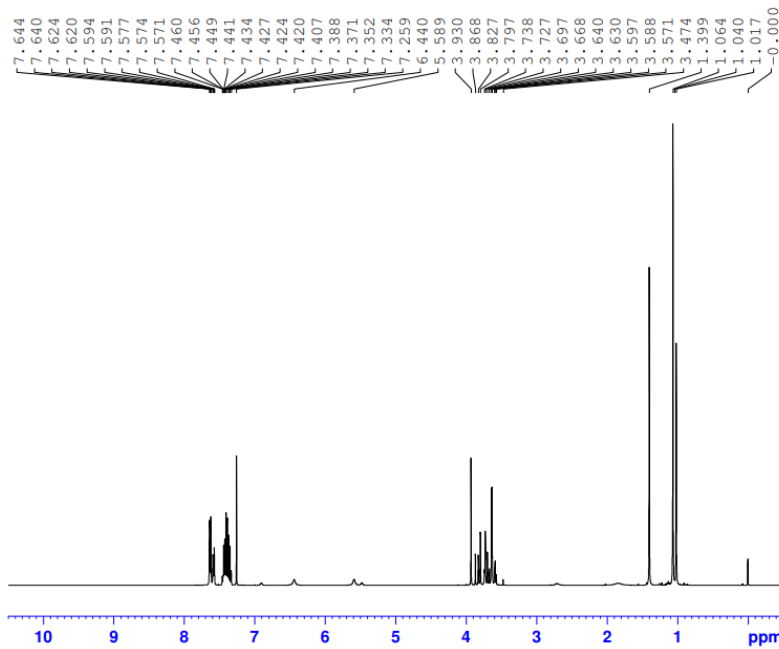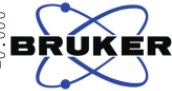

Current Data Parameters  
 NAME liu-20210706-TBDPS CONH2-1H  
 EXPNO 10  
 PROCNO 1  
 F2 - Acquisition Parameters  
 Date\_ 20210706  
 Time 13.53 h  
 INSTRUM spect  
 FPROG z108618\_0934 f  
 PULPROG zg30  
 TD 65536  
 SOLVENT CDCl3  
 NS 16  
 DS 2  
 SSB 8012.820 Hz  
 FIDRES 0.244533 Hz  
 AQ 4.0894465 sec  
 RG 78.31  
 DW 62.400 usec  
 DE 6.50 usec  
 TE 296.2 K  
 D1 1.00000000 sec  
 TDO 400.0324702 MHz  
 NUC1 1H  
 P1 14.00 usec  
 PL1 13.00000000 W  
 F2 - Processing parameters  
 SI 65536  
 SF 400.0300033 MHz  
 MW EM  
 SSB 0  
 LB 0.30 Hz  
 GB 0  
 PC 1.00

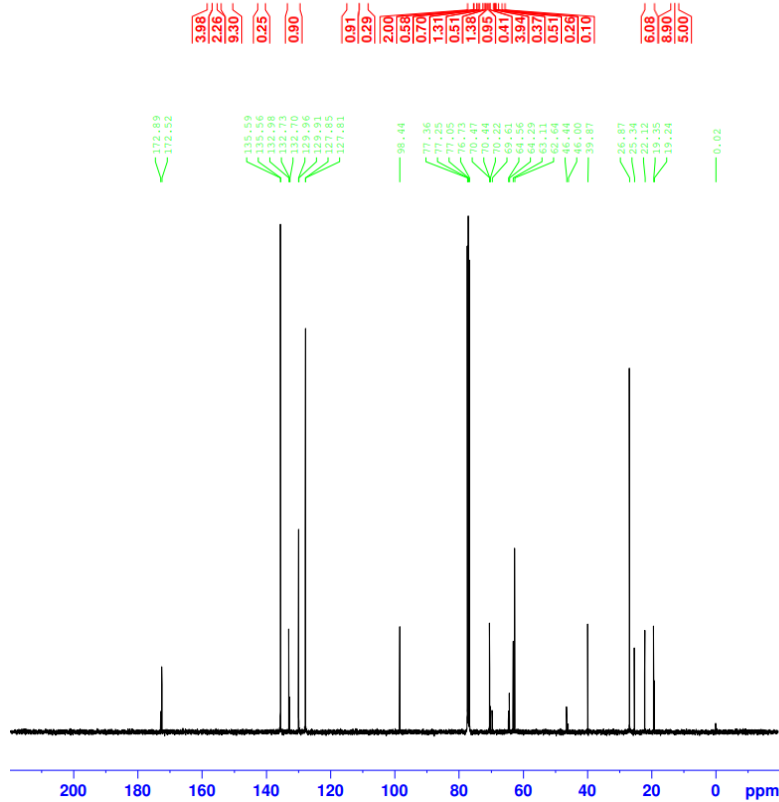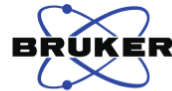

Current Data Parameters  
 NAME liu-20210706-TBDPS CONH2-13C  
 EXPNO 10  
 PROCNO 1  
 F2 - Acquisition Parameters  
 Date\_ 20210706  
 Time 17.02 h  
 INSTRUM spect  
 FPROG z108618\_0934 f  
 PULPROG zgpg30  
 TD 65536  
 SOLVENT CDCl3  
 NS 1024  
 DS 4  
 SSB 24038.461 Hz  
 FIDRES 0.733596 Hz  
 AQ 1.3631488 sec  
 RG 201.24  
 DW 20.800 usec  
 DE 6.50 usec  
 TE 297.3 K  
 D1 2.00000000 sec  
 D11 0.03000000 sec  
 TDO 1  
 SFO1 100.5976423 MHz  
 NUC1 13C  
 P1 10.00 usec  
 PL1 51.00500107 W  
 SFO2 400.0316001 MHz  
 NUC2 1H  
 CPDPRG2 waltz16  
 PCPD 90.00 usec  
 PLM2 13.00000000 W  
 PLM12 0.31457001 W  
 PLM13 0.15823001 W  
 F2 - Processing parameters  
 SI 32768  
 SF 100.5876335 MHz  
 MW EM  
 SSB 0  
 LB 1.00 Hz  
 GB 0  
 PC 1.40



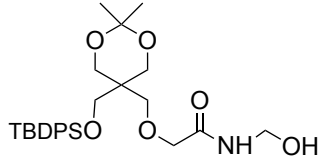

S2

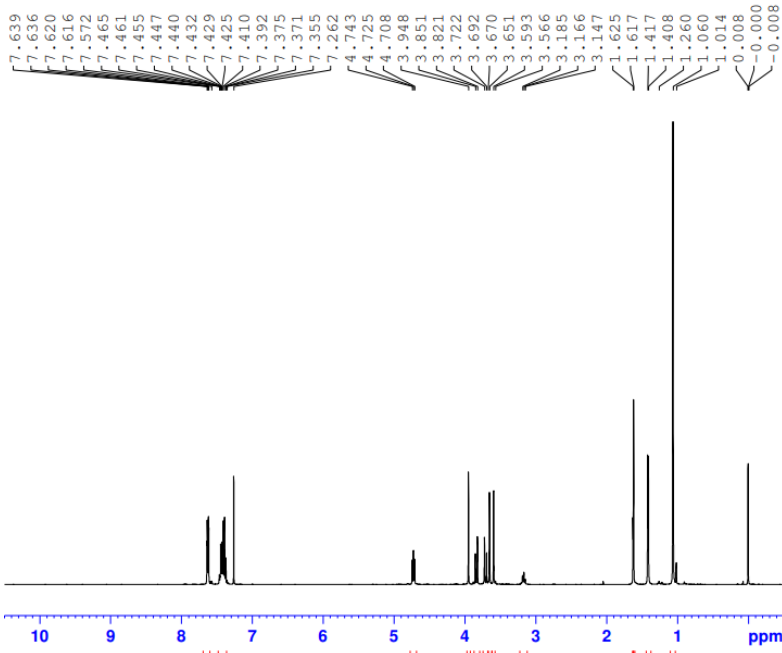

**BRUKER**

Current Data Parameters  
 NAME 11u-20210706-TBDPSO CONNH2OR-1R  
 EXPNO 10  
 PROCNO 1

F2 - Acquisition Parameters  
 Date\_ 20210706  
 Time 13.58 h  
 INSTRUM spect  
 PROBRD 2108618\_0934 ( )  
 PULPROG zgpg30  
 TD 65536  
 SOLVENT CDCl3  
 NS 16  
 DS 2  
 SWH 8012.820 Hz  
 FIDRES 0.244632 Hz  
 AQ 4.0894465 sec  
 RG 201.20  
 DW 82.400 usec  
 DE 6.50 usec  
 TE 296.1 K  
 D1 1.00000000 sec  
 TSD 1  
 SFO1 400.0324702 MHz  
 NUC1 1H  
 P1 4.00 usec  
 PL1 13.00000000 W

F2 - Processing parameters  
 SI 65536  
 SF 400.0300083 MHz  
 WDW EM  
 SSB 0  
 LB 0.30 Hz  
 GB 0  
 PC 1.00

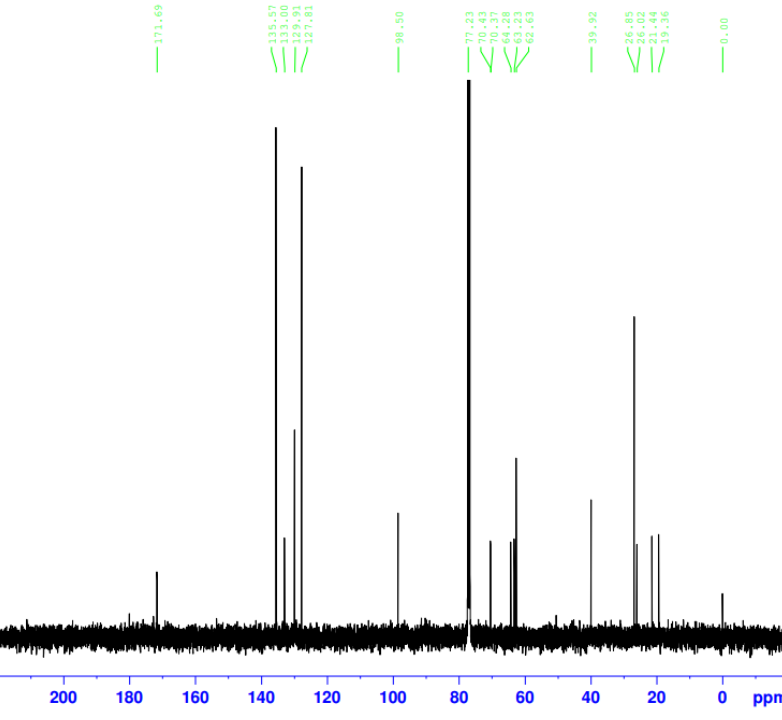

**BRUKER**

Current Data Parameters  
 NAME 11u-20210706-TBDPSO CONNH2OR-13C  
 EXPNO 10  
 PROCNO 1

F2 - Acquisition Parameters  
 Date\_ 20210706  
 Time 14.55 h  
 INSTRUM spect  
 PROBRD 2108618\_0934 ( )  
 PULPROG zgpg30  
 TD 65536  
 SOLVENT CDCl3  
 NS 64  
 DS 4  
 SWH 24018.461 Hz  
 FIDRES 0.733596 Hz  
 AQ 1.3531888 sec  
 RG 201.24  
 DW 20.800 usec  
 DE 6.50 usec  
 TE 297.2 K  
 D1 2.00000000 sec  
 TSD 1  
 SFO1 100.5976823 MHz  
 NUC1 13C  
 P1 10.00 usec  
 PL1 51.00000000 W  
 SFO2 400.0316001 MHz  
 NUC2 1H  
 CPOPRG2 waltz16  
 PCPD2 90.00 usec  
 PLW2 13.00000000 W  
 PLW12 0.31457001 W  
 PLW13 0.19428001 W

F2 - Processing parameters  
 SI 32768  
 SF 100.5876235 MHz  
 WDW EM  
 SSB 0  
 LB 1.00 Hz  
 GB 0  
 PC 1.40

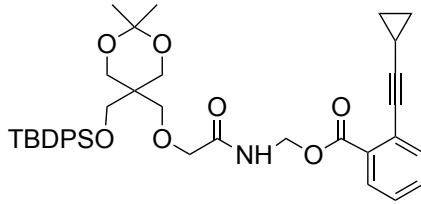

22b

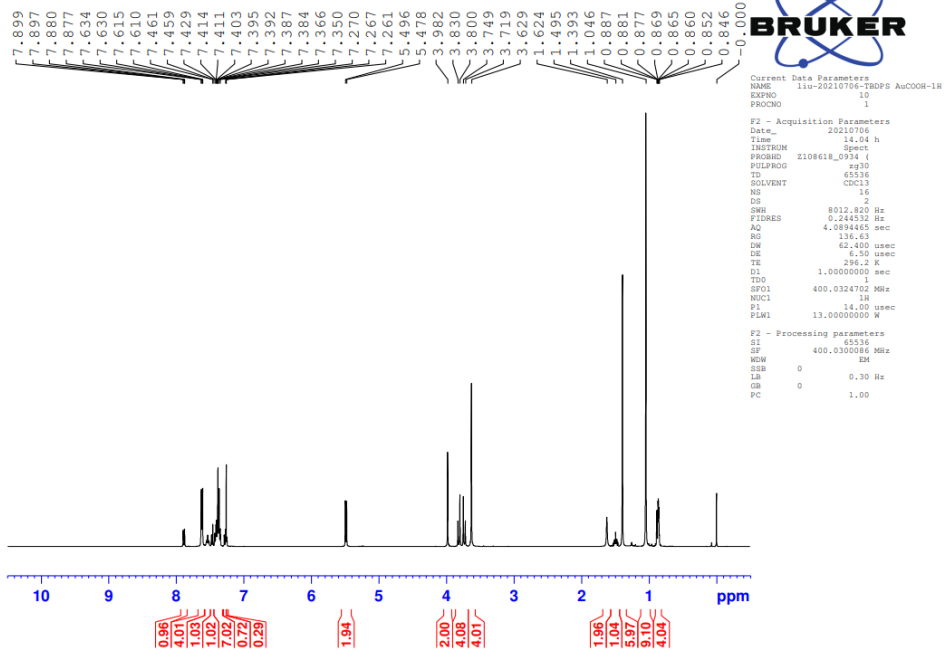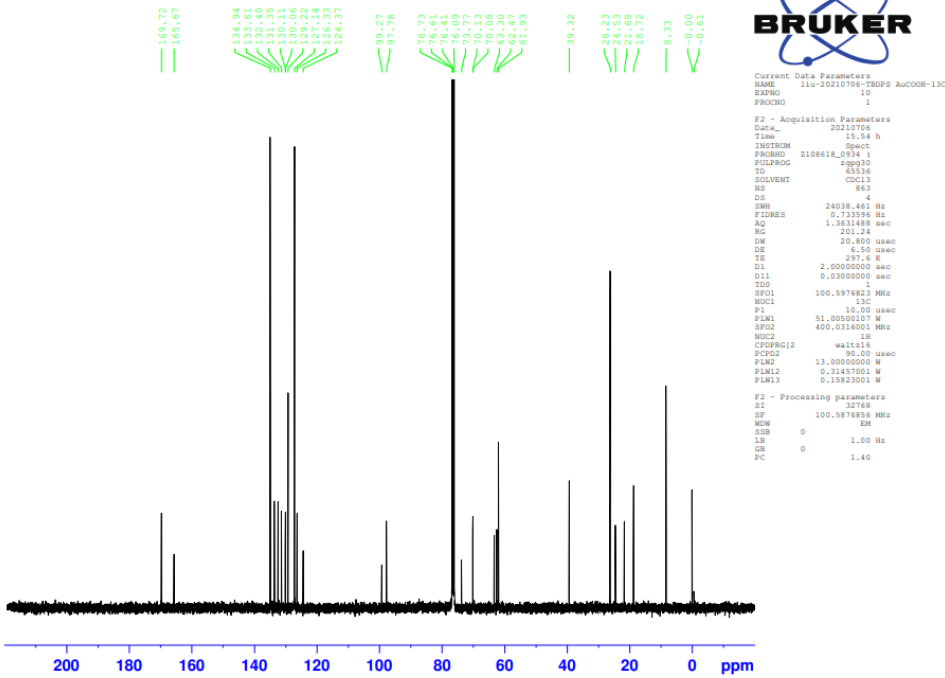

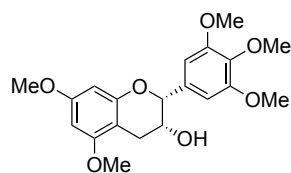

S3

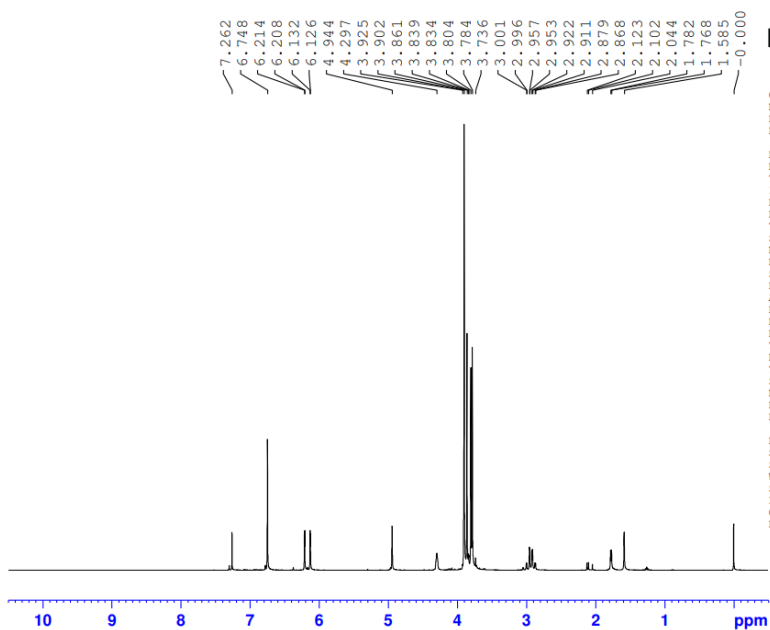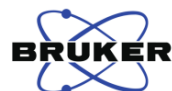

Current Data Parameters  
 NAME liu-20210406-k5-1H  
 EXPNO 10  
 PROCNO 1

F2 - Acquisition Parameters  
 Date\_ 20210406  
 Time\_ 12.01 h  
 INSTRUM Spect  
 PROBHD Z108618\_0934 (  
 PULPROG zg30  
 TD 65536  
 SOLVENT CDCl3  
 NS 16  
 DS 2  
 SWH 8012.820 Hz  
 FIDRES 0.244532 Hz  
 AQ 4.0994465 sec  
 RG 157.94  
 DW 62.400 usec  
 DE 6.50 usec  
 TE 296.2 K  
 D1 1.00000000 sec  
 TD0 1  
 SFO1 400.0324702 MHz  
 NUC1 1H  
 P1 14.00 usec  
 PLW1 13.00000000 W

F2 - Processing parameters  
 SI 65536  
 SF 400.0300087 MHz  
 WDW EM  
 SSB 0  
 LB 0.30 Hz  
 GB 0  
 PC 1.00

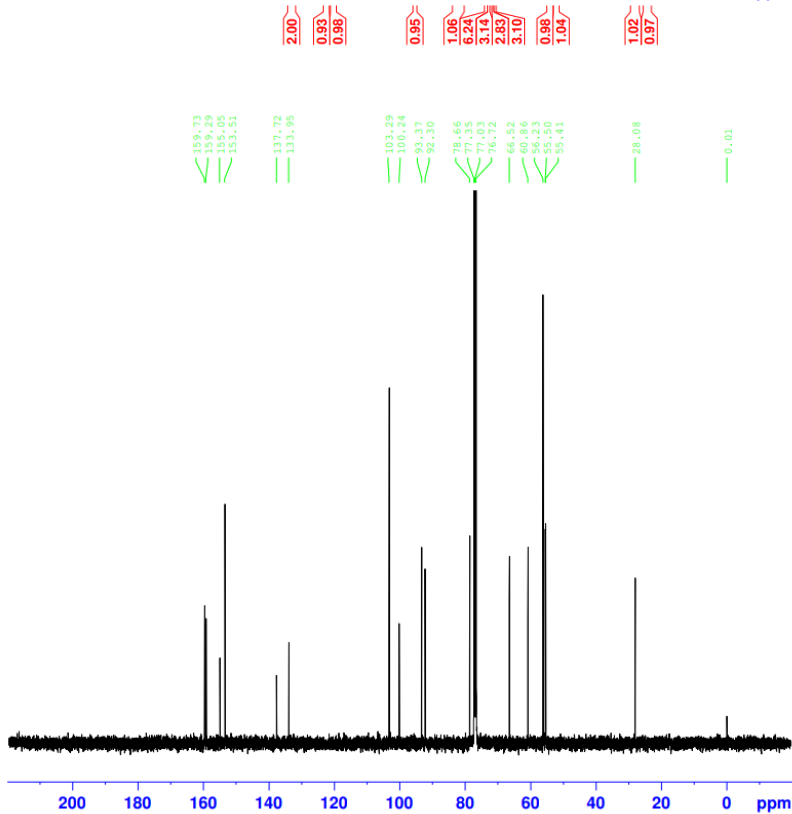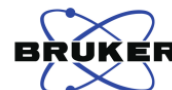

Current Data Parameters  
 NAME liu-20210406-k5-13C  
 EXPNO 10  
 PROCNO 1

F2 - Acquisition Parameters  
 Date\_ 20210406  
 Time\_ 13.01 h  
 INSTRUM Spect  
 PROBHD Z108618\_0934 (  
 PULPROG zgpg30  
 TD 65536  
 SOLVENT CDCl3  
 NS 1024  
 DS 4  
 SWH 24038.461 Hz  
 FIDRES 0.733596 Hz  
 AQ 1.3631488 sec  
 RG 201.24  
 DW 20.800 usec  
 DE 6.50 usec  
 TE 297.2 K  
 D1 2.00000000 sec  
 D11 0.03000000 sec  
 TD0 1  
 SFO1 100.5976823 MHz  
 NUC1 13C  
 P1 10.00 usec  
 PLW1 51.00500107 W  
 SFO2 400.0316001 MHz  
 NUC2 1H  
 CPDPRG[2] waltz16  
 PCPD2 90.00 usec  
 PLW2 13.00000000 W  
 PLW12 0.31457001 W  
 PLW13 0.15823001 W

F2 - Processing parameters  
 SI 32768  
 SF 100.5876252 MHz  
 WDW EM  
 SSB 0  
 LB 1.00 Hz  
 GB 0  
 PC 1.40

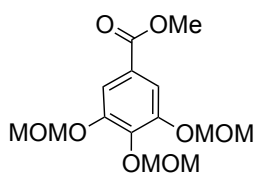

S4

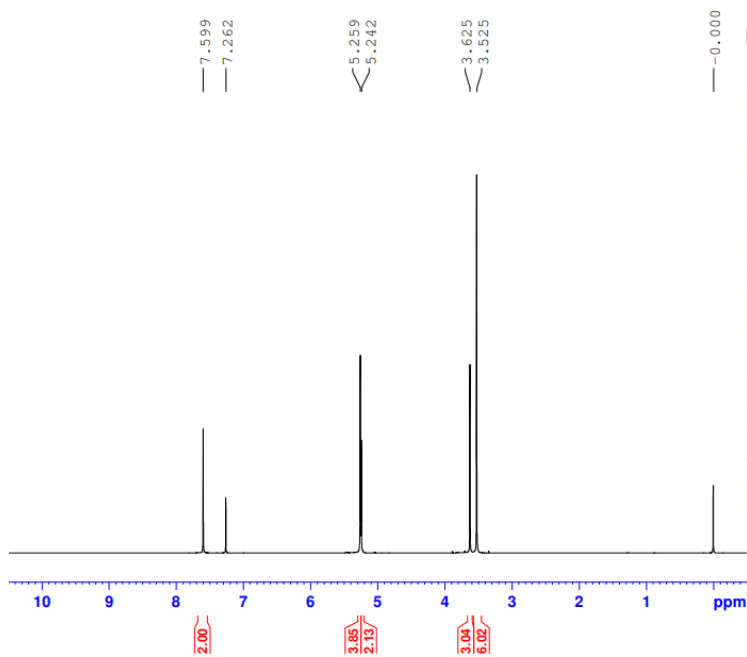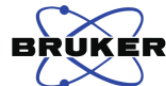

Current Data Parameters  
 NAME liu-20210401-m-1H  
 EXPNO 10  
 PROCNO 1

F2 - Acquisition Parameters  
 Date\_ 20210402  
 Time 12.07 h  
 INSTRUM Spect  
 PROBHD Z108618\_0934 (  
 PULPROG zg30  
 TD 65536  
 SOLVENT CDCl3  
 NS 16  
 DS 2  
 SWH 8012.820 Hz  
 FIDRES 0.244532 Hz  
 AQ 4.0894465 sec  
 RG 201.24  
 DW 62.400 usec  
 DE 6.50 usec  
 TE 296.7 K  
 D1 1.00000000 sec  
 TD0 1  
 SFO1 400.0324702 MHz  
 NUC1 1H  
 P1 14.00 usec  
 PLW1 13.00000000 W

F2 - Processing parameters  
 SI 65536  
 SF 400.0300081 MHz  
 WDW EM  
 SSB 0  
 LB 0.30 Hz  
 GB 0  
 PC 1.00

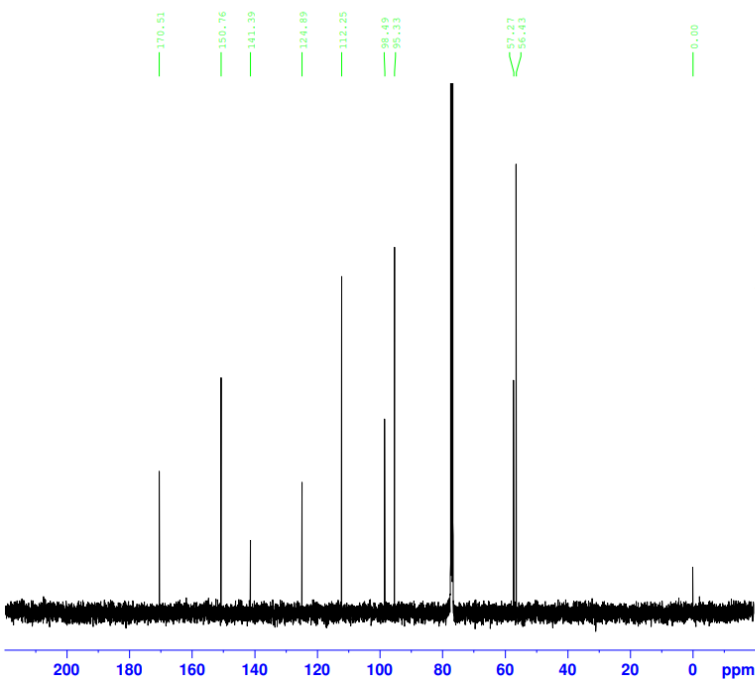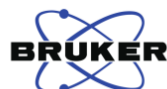

Current Data Parameters  
 NAME liu-20210406-m4-13C  
 EXPNO 10  
 PROCNO 1

F2 - Acquisition Parameters  
 Date\_ 20210406  
 Time 14.11 h  
 INSTRUM Spect  
 PROBHD Z108618\_0934 (  
 PULPROG zgpg30  
 TD 65536  
 SOLVENT CDCl3  
 NS 1024  
 DS 4  
 SWH 24038.461 Hz  
 FIDRES 0.733596 Hz  
 AQ 1.3631488 sec  
 RG 201.24  
 DW 20.800 usec  
 DE 6.50 usec  
 TE 297.3 K  
 D1 2.00000000 sec  
 D11 0.03000000 sec  
 TD0 1  
 SFO1 100.5976823 MHz  
 NUC1 13C  
 P1 10.00 usec  
 PLW1 51.00500107 W  
 SFO2 400.0316001 MHz  
 NUC2 1H  
 CPDPRG2 waltz16  
 PCPD2 90.00 usec  
 PLW2 13.00000000 W  
 PLW12 0.31457001 W  
 PLW13 0.15823001 W

F2 - Processing parameters  
 SI 32768  
 SF 100.5876235 MHz  
 WDW EM  
 SSB 0  
 LB 1.00 Hz  
 GB 0  
 PC 1.40

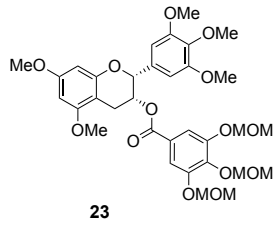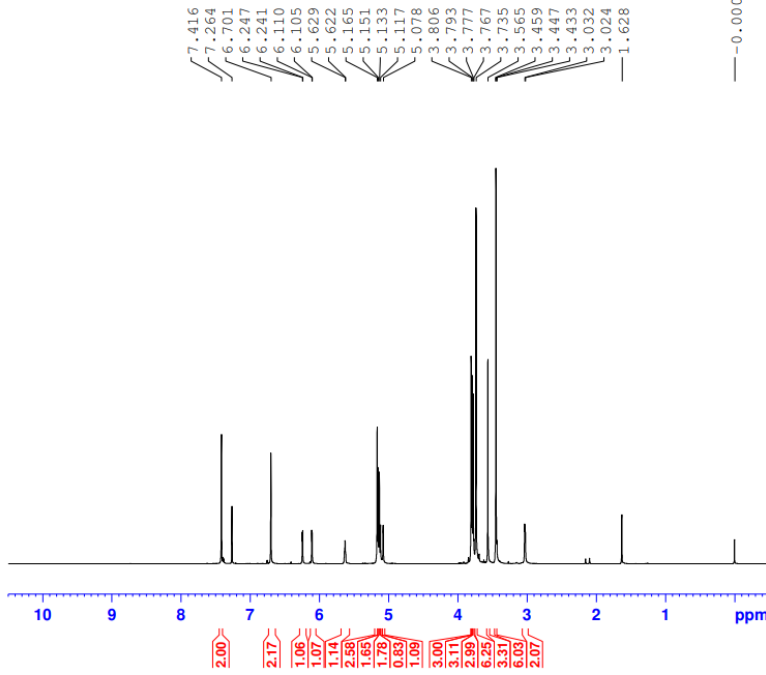

-0.000

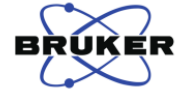

Current Data Parameters  
 NAME liu-0406-n2-1H  
 EXPNO 10  
 PROCNO 1

F2 - Acquisition Parameters  
 Date\_ 20210406  
 Time 19.16 h  
 INSTRUM Spect  
 PROBHD z108618\_0934 (1  
 PULPROG zg30  
 TD 65536  
 SOLVENT CDCl3  
 NS 16  
 DS 2  
 SWH 8012.820 Hz  
 FIDRES 0.244532 Hz  
 AQ 4.0894465 sec  
 RG 112.25  
 DW 62.400 usec  
 DE 6.50 usec  
 TE 296.7 K  
 D1 1.00000000 sec  
 TDO 1  
 SFO1 400.0324702 MHz  
 NUC1 1H  
 P1 14.00 usec  
 PLW1 13.00000000 W

F2 - Processing parameters  
 SI 65536  
 SF 400.0300079 MHz  
 WDW EM  
 SSB 0  
 LB 0.30 Hz  
 GB 0  
 PC 1.00

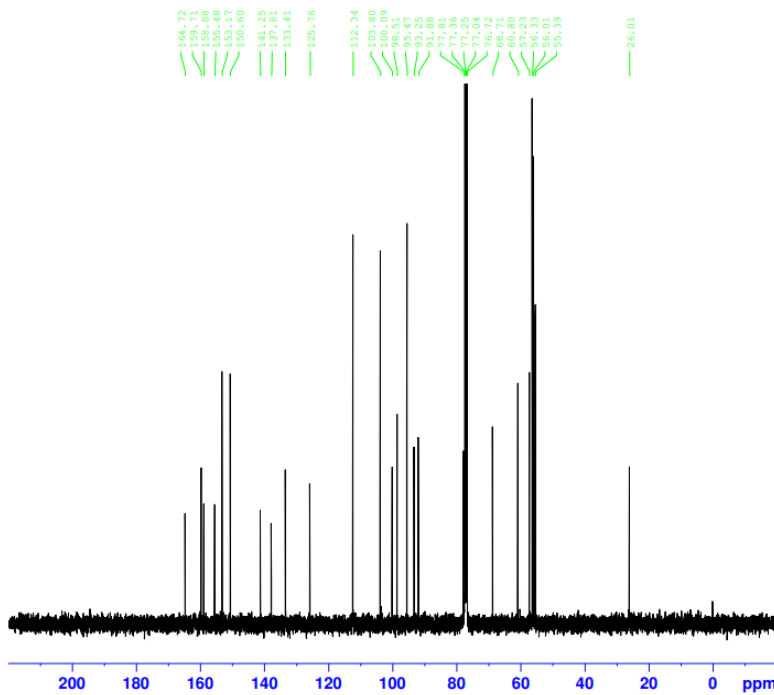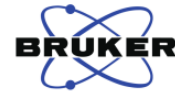

Current Data Parameters  
 NAME liu-0406-n2-13C  
 EXPNO 10  
 PROCNO 1

F2 - Acquisition Parameters  
 Date\_ 20210406  
 Time 19.50 h  
 INSTRUM Spect  
 PROBHD z108618\_0934 (1  
 PULPROG zgpg30  
 TD 65536  
 SOLVENT CDCl3  
 NS 577  
 DS 4  
 SWH 24038.461 Hz  
 FIDRES 0.733596 Hz  
 AQ 1.3631488 sec  
 RG 201.24  
 DW 20.800 usec  
 DE 6.50 usec  
 TE 297.3 K  
 D1 2.00000000 sec  
 D11 0.03000000 sec  
 TDO 1  
 SFO1 100.5976823 MHz  
 NUC1 13C  
 P1 10.00 usec  
 PLW1 51.00500107 W  
 SFO2 400.0316001 MHz  
 NUC2 1H  
 CPDPRG[2] waltz16  
 PCPD2 90.00 usec  
 PLW2 13.00000000 W  
 PLM2 0.31457001 W  
 PLW3 0.15823001 W

F2 - Processing parameters  
 SI 32768  
 SF 100.5876235 MHz  
 WDW EM  
 SSB 0  
 LB 1.00 Hz  
 GB 0  
 PC 1.40

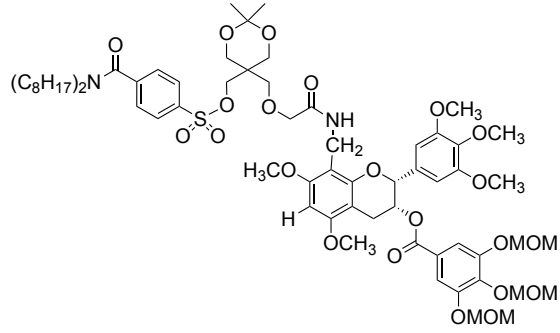

20a

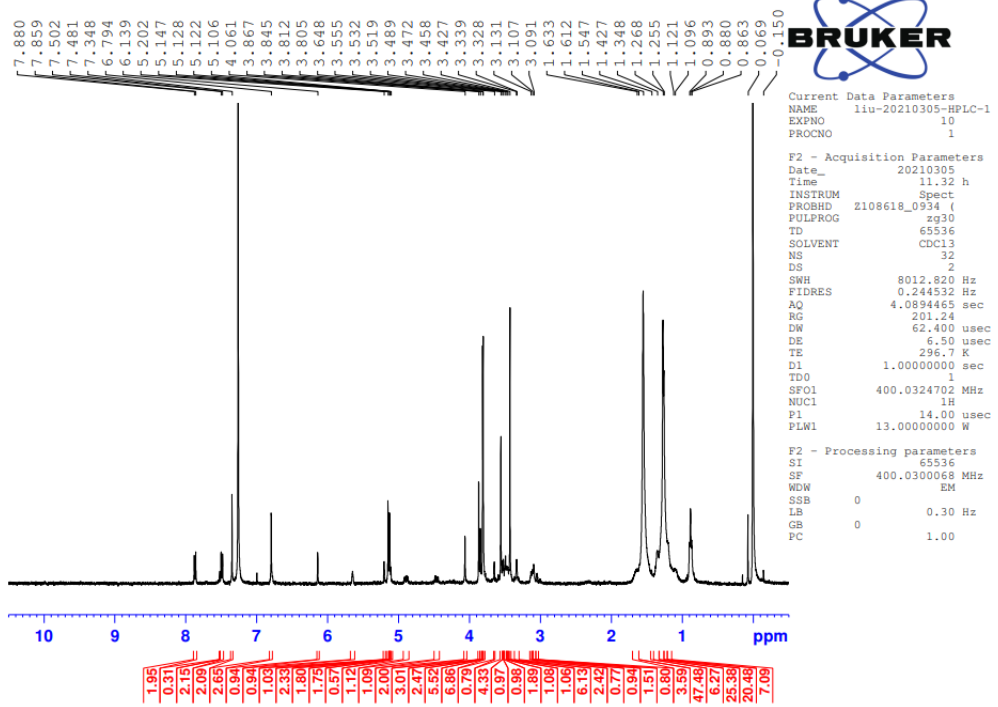

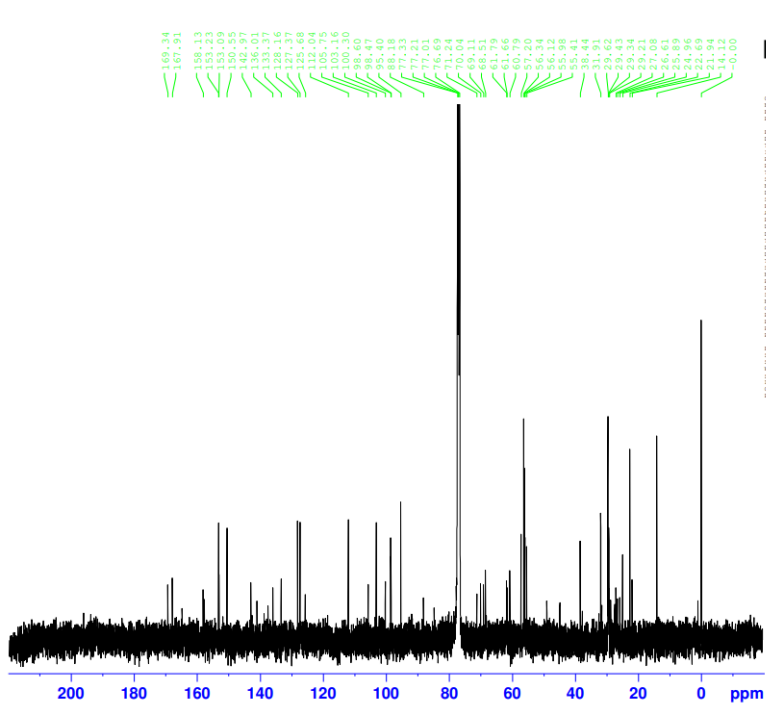

169.34  
158.13  
153.09  
150.55  
138.01  
133.37  
129.16  
125.68  
112.04  
103.16  
100.30  
98.60  
88.60  
88.18  
77.23  
77.01  
70.04  
69.11  
61.76  
61.66  
60.79  
56.39  
55.98  
55.98  
38.44  
31.91  
29.45  
29.34  
27.21  
26.61  
25.89  
22.69  
21.94  
14.12  
9.00

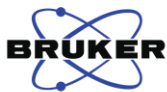

Current Data Parameters  
NAME 1iu-20210309-HPLC-down-13C-2nd overnight  
EXPNO 10  
PROCNO 1

F2 - Acquisition Parameters  
Date\_ 20210309  
Time 12.42 h  
INSTRUM spect  
PROBHD 2108618\_0934 (4  
PULPROG noesyppph  
TD 2048  
SOLVENT CDCl3  
NS 4  
DS 32  
SWH 1698.370 Hz  
FIDRES 1.658564 Hz  
AQ 0.6029312 sec  
RG 201.24  
DW 294.400 usec  
DE 6.50 usec  
TE 296.0 K  
D0 0.00027657 sec  
D1 2.00000000 sec  
D8 0.30000001 sec  
D16 0.00020000 sec  
INO 0.00058880 sec  
TDev 1  
SFO1 400.0320199 MHz  
NUC1 13  
P1 14.00 usec  
P2 28.00 usec  
PLW1 13.00000000 W  
GENAM[1] SMSQ10.100  
CP21 40.00 %  
P16 1000.00 usec

F1 - Acquisition parameters  
TD 256  
SFO1 400.032 MHz  
FIDRES 13.268912 Hz  
SW 4.246 ppm  
F2MODE TFP1

F2 - Processing parameters  
SI 1024  
SF 400.0300068 MHz  
WDW OSINE  
SSB 2  
LB 0 Hz  
GB 0  
PC 1.00

F1 - Processing parameters  
SI 1024  
MC2 TFP1  
SF 400.0300068 MHz  
WDW OSINE  
SSB 2  
LB 0 Hz  
GB 0

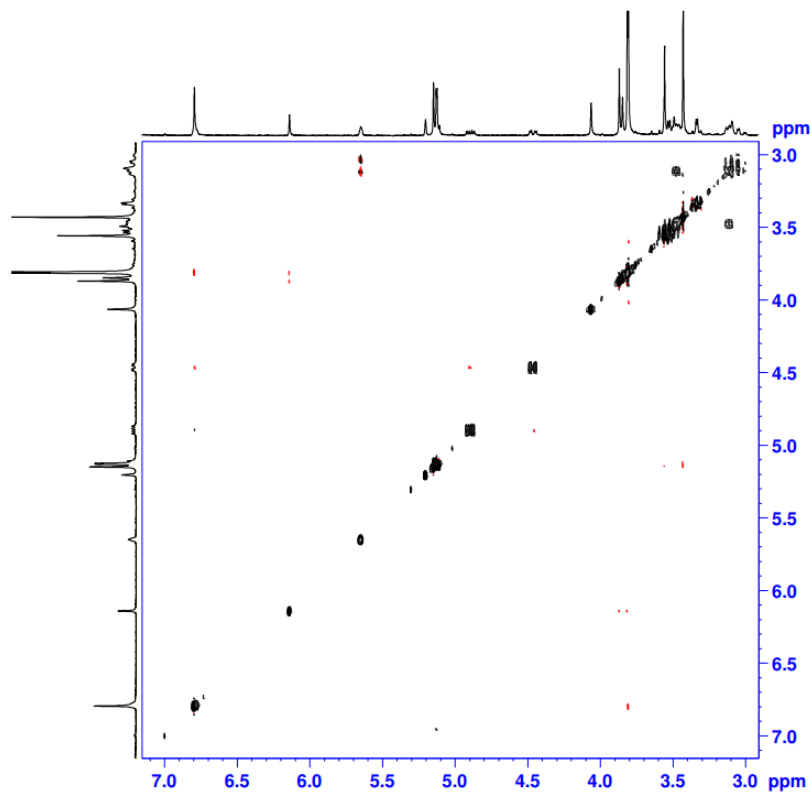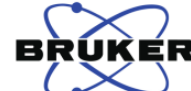

Current Data Parameters  
NAME 1iu-20210309-HPLC-up-NOESY  
EXPNO 15  
PROCNO 1

F2 - Acquisition Parameters  
Date\_ 20210309  
Time 12.30 h  
INSTRUM spect  
PROBHD 2108618\_0934 (4  
PULPROG noesyppph  
TD 2048  
SOLVENT CDCl3  
NS 4  
DS 32  
SWH 1698.370 Hz  
FIDRES 1.658564 Hz  
AQ 0.6029312 sec  
RG 201.24  
DW 294.400 usec  
DE 6.50 usec  
TE 296.0 K  
D0 0.00027657 sec  
D1 2.00000000 sec  
D8 0.30000001 sec  
D16 0.00020000 sec  
INO 0.00058880 sec  
TDev 1  
SFO1 400.0320199 MHz  
NUC1 1H  
P1 14.00 usec  
P2 28.00 usec  
PLW1 13.00000000 W  
GENAM[1] SMSQ10.100  
CP21 40.00 %  
P16 1000.00 usec

F1 - Acquisition parameters  
TD 256  
SFO1 400.032 MHz  
FIDRES 13.268912 Hz  
SW 4.246 ppm  
F2MODE TFP1

F2 - Processing parameters  
SI 1024  
SF 400.0300068 MHz  
WDW OSINE  
SSB 2  
LB 0 Hz  
GB 0  
PC 1.00

F1 - Processing parameters  
SI 1024  
MC2 TFP1  
SF 400.0300068 MHz  
WDW OSINE  
SSB 2  
LB 0 Hz  
GB 0

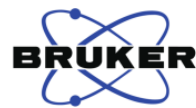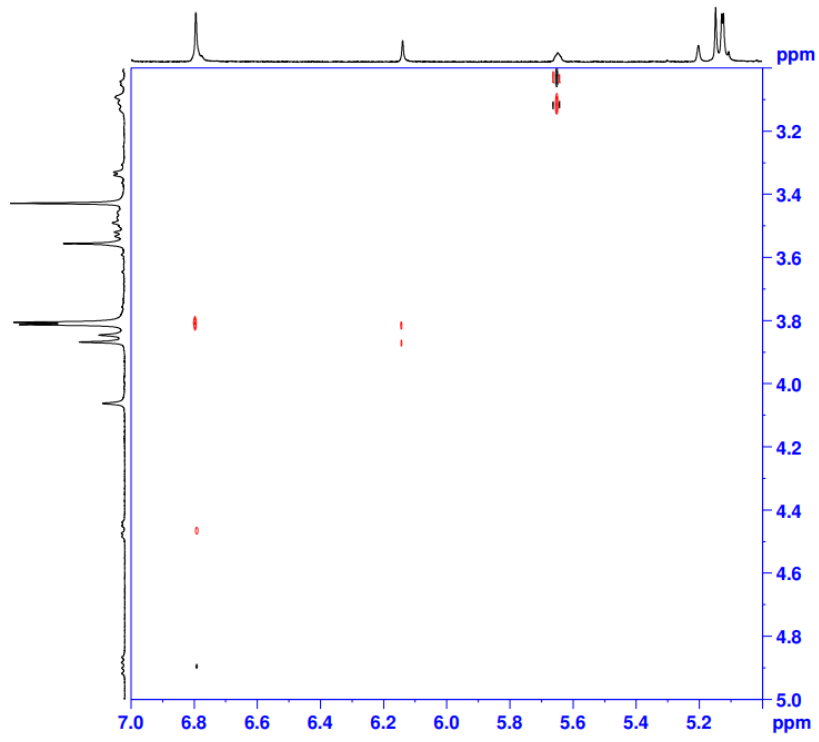

Current Data Parameters  
NAME liu-20210309-HPLC-up-NOESY  
EXPNO 15  
PROCNO 1

F2 - Acquisition Parameters  
Date\_ 20210309  
Time 12.30 h  
INSTRUM Spect  
PROBHD Z108618\_0934 (  
PULPROG noesygpph  
TD 2048  
SOLVENT CDC13  
NS 4  
DS 32  
SWH 1698.370 Hz  
FIDRES 1.658564 Hz  
AQ 0.6029312 sec  
RG 201.24  
DW 294.400 usec  
DE 6.50 usec  
TE 296.8 K  
DO 0.00027657 sec  
D1 2.00000000 sec  
D8 0.30000001 sec  
D16 0.00020000 sec  
INO 0.00058880 sec  
TDav 1  
SF01 400.0320199 MHz  
NUC1 1H  
F1 14.00 usec  
P2 28.00 usec  
PLW1 13.00000000 W  
CPDAM[1] SMS210.100  
GP21 40.00 %  
P16 1000.00 usec

F1 - Acquisition parameters  
TD 256  
SF01 400.032 MHz  
FIDRES 13.268512 Hz  
SW 4.246 ppm  
FMODE TPP1

F2 - Processing parameters  
SI 1024  
SF 400.0300068 MHz  
WDW QSINE  
SSB 2  
LB 0 Hz  
GB 0  
PC 1.00

F1 - Processing parameters  
SI 1024  
MC2 TPP1  
SF 400.0300068 MHz  
WDW QSINE  
SSB 2  
LB 0 Hz  
GB 0



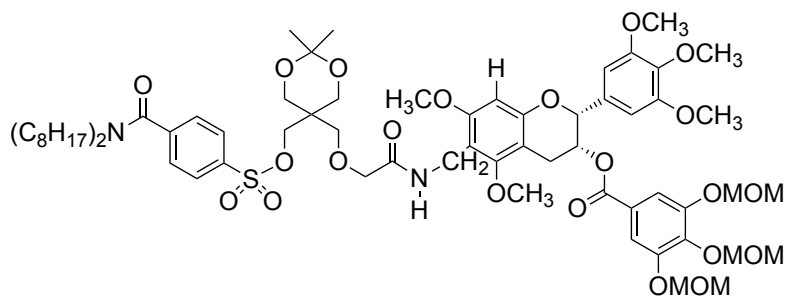

21a

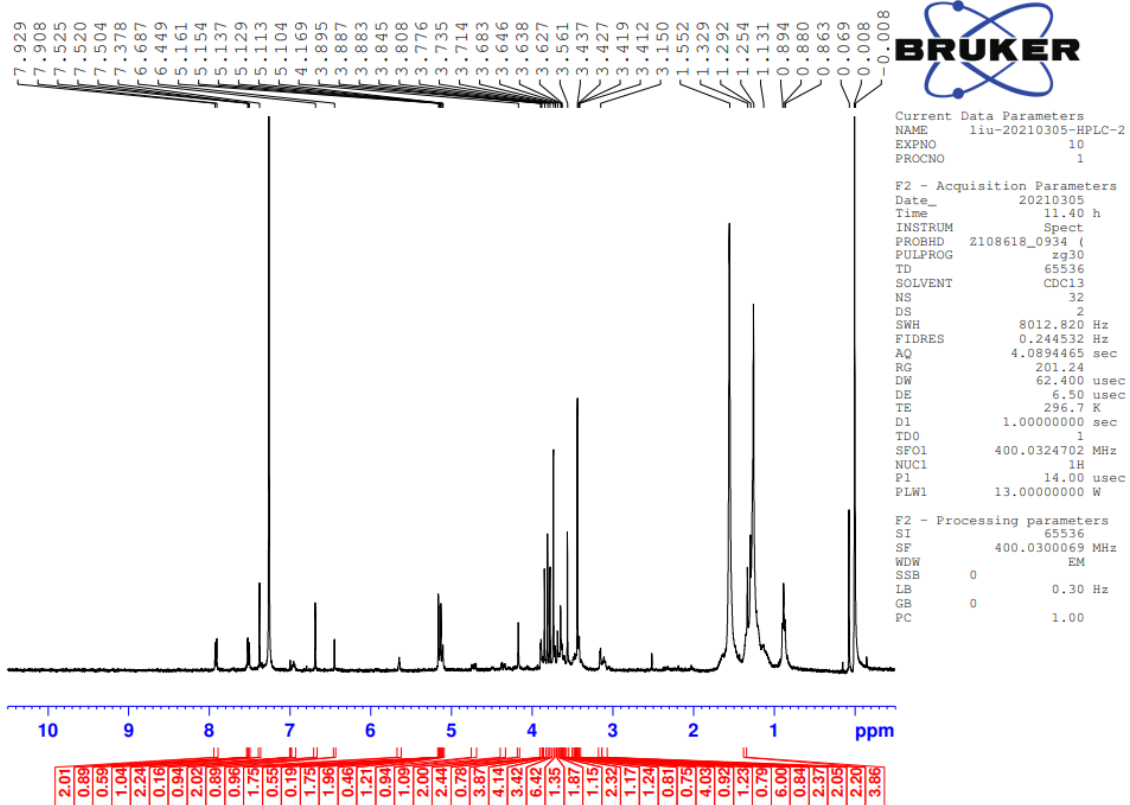

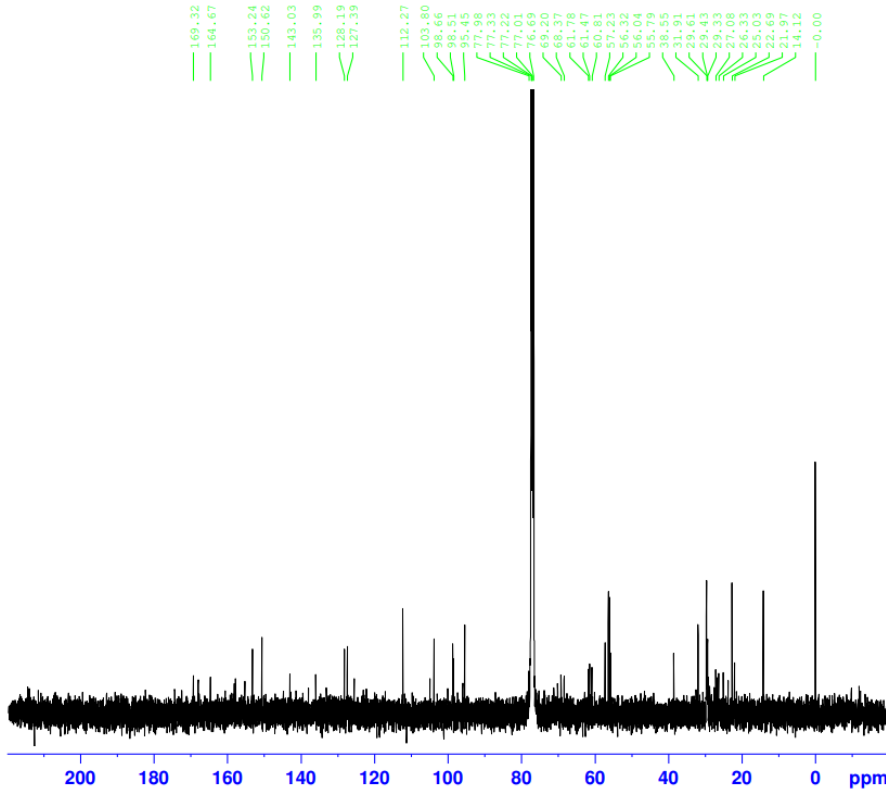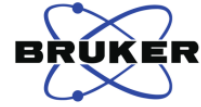

Current Data Parameters  
 NAME 1iu-20210308-HPLC-da  
 EXPNO 10  
 PROCNO 1

F2 - Acquisition Parameters  
 Date\_ 20210309  
 Time 10.34 h  
 INSTRUM Spect  
 PROBHD Z108618\_0934 (  
 PULPROG zgpg30  
 TD 85536  
 SOLVENT CDCl3  
 NS 12700  
 DS 4  
 SMH 24038.461 Hz  
 FIDRES 0.733596 Hz  
 AQ 1.3631488 sec  
 RG 201.24  
 DW 20.800 usec  
 DE 6.50 usec  
 TE 298.0 K  
 D1 2.0000000 sec  
 D11 0.0300000 sec  
 TDO 1  
 SFO1 100.5976823 MHz  
 NUC1 13C  
 P1 10.00 usec  
 PLW1 51.0050107 W  
 SFO2 400.0316001 MHz  
 NUC2 1H  
 CPDPRG[2] waltz16  
 PCPD2 90.00 usec  
 PLW2 13.0000000 W  
 PLW12 0.31457001 W  
 PLW13 0.15823001 W

F2 - Processing parameters  
 SI 32768  
 SF 100.5876238 MHz  
 WDW EM  
 SSB 0  
 LB 1.00 Hz  
 GB 0  
 PC 1.40

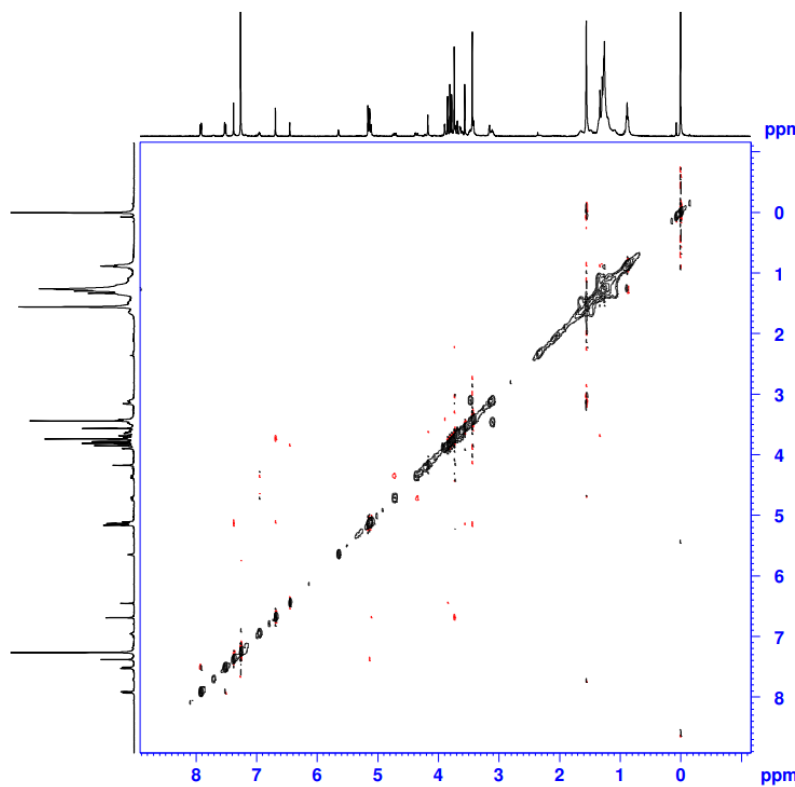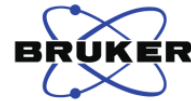

Current Data Parameters  
 NAME 1iu-20210308-HPLC-down-WDSY  
 EXPNO 11  
 PROCNO 1

F2 - Acquisition Parameters  
 Date\_ 20210308  
 Time 19.30 h  
 INSTRUM Spect  
 PROBHD Z108618\_0934 (  
 PULPROG noesyppppp  
 TD 2048  
 SOLVENT CDCl3  
 NS 16  
 DS 32  
 SMH 4032.258 Hz  
 FIDRES 3.937752 Hz  
 AQ 0.2539520 sec  
 RG 180.02  
 DW 124.000 usec  
 DE 6.50 usec  
 TE 297.0 K  
 D0 0.00010617 sec  
 D1 2.0004802 sec  
 D8 0.3000001 sec  
 D11 0.0300000 sec  
 D12 0.0002000 sec  
 D16 0.0002000 sec  
 INO 0.00024800 sec  
 TDAV 1  
 SFO1 400.0315598 MHz  
 NUC1 1H  
 P1 14.00 usec  
 P2 28.00 usec  
 P7 2500.00 usec  
 PLM1 13.0000000 W  
 PLM10 2.83109999 W  
 GFMAM[1] SMSQ10.100  
 GP21 40.00 %  
 P16 1000.00 usec

F1 - Acquisition parameters  
 TD 256  
 SFO1 400.0316 MHz  
 FIDRES 31.502016 Hz  
 SW 10.080 ppm  
 FreqMODE States-TPPI

F2 - Processing parameters  
 SI 1024  
 SF 400.0300064 MHz  
 WDW QSINE  
 SSB 2  
 LB 0 Hz  
 GB 0  
 PC 1.00

F1 - Processing parameters  
 SI 1024  
 MC2 States-TPPI  
 SF 400.0300064 MHz  
 WDW QSINE  
 SSB 2  
 LB 0 Hz  
 GB 0

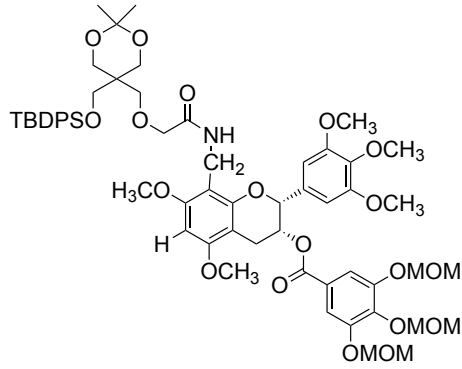

20b

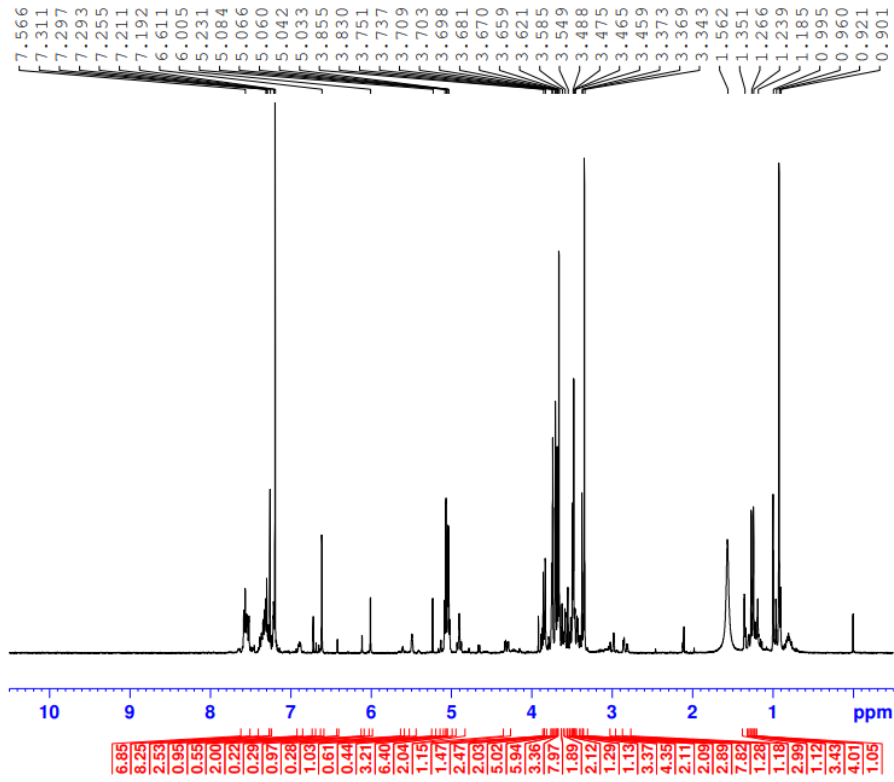

Current Data Parameters  
 NAME iis-20211107-2-12-4nd-8pic-up-1  
 EXPNO 10  
 PROCNO 1

F2 - Acquisition Parameters  
 Date\_ 20211102  
 Time 10.17 h  
 INSTRUM Spect  
 PROBHD 2108618\_0934 (   
 PULPROG zg30  
 TD 65536  
 SOLVENT CDCl3  
 NS 16  
 DS 2  
 SWH 8012.820 Hz  
 FIDRES 0.244532 Hz  
 AQ 4.0894465 sec  
 RG 201.24  
 DM 62.400 usec  
 DE 6.50 usec  
 TE 298.0 K  
 D1 1.00000000 sec  
 TD0 1  
 SFO1 400.0324702 MHz  
 NUC1 1H  
 P1 14.00 usec  
 PLW1 13.00000000 W

F2 - Processing parameters  
 SI 65536  
 SF 400.0300360 MHz  
 WDW EM  
 SSB 0  
 LB 0.30 Hz  
 GB 0  
 PC 1.00

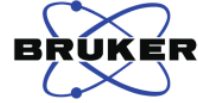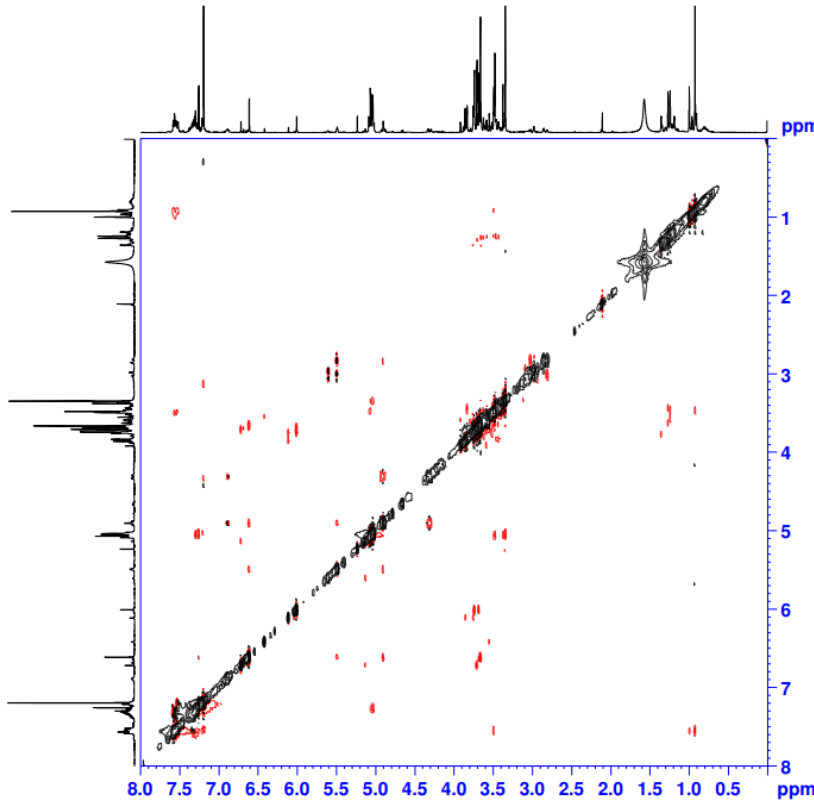

Current Data Parameters  
NAME 1lu-20211103-c-12-4nd-hpic-up-noisy  
EXPNO 10  
PROCNO 1

F2 - Acquisition Parameters  
Date\_ 20211102  
Time 10.48 h  
INSTRUM Spect  
PROCNO 2108618\_0934 (  
PULPROG noesygpprog  
TD 2048  
SOLVENT CDCl3  
NS 4  
DS 32  
SWH 3875.969 Hz  
FIDRES 3.785126 Hz  
AQ 0.2041920 sec  
RG 136.63  
DW 129.000 usec  
DE 6.50 usec  
TE 296.1 K  
D0 0.0001117 sec  
D1 1.9938006 sec  
C8 0.30000001 sec  
D11 0.03000000 sec  
D12 0.00020000 sec  
D16 0.00020000 sec  
IMD 0.00020000 sec  
TD0 1  
TD0V 400.0315392 MHz  
SFO1 400.0315392 MHz  
NUC1 1H  
P1 14.00 usec  
P12 28.00 usec  
P13 2000.00 usec  
PLW1 13.00000000 W  
PLW2 2.8109899 W  
GRAN[1] SMSQ10.100  
GPI 40.00 s  
P16 1000.00 usec

F1 - Acquisition parameters  
TD 256  
SFO1 400.0315 MHz  
FIDRES 30.281808 Hz  
SW 9.689 ppm  
FAMODE States-TPPI

F2 - Processing parameters  
SI 1024  
SF 400.0300361 MHz  
WDW QSIHC  
SSB 2  
LB 0 Hz  
GB 0  
PC 1.00

F1 - Processing parameters  
SI 1024  
MC2 States-TPPI  
SF 400.0300361 MHz  
WDW QSIHC  
SSB 2  
LB 0 Hz  
GB 0

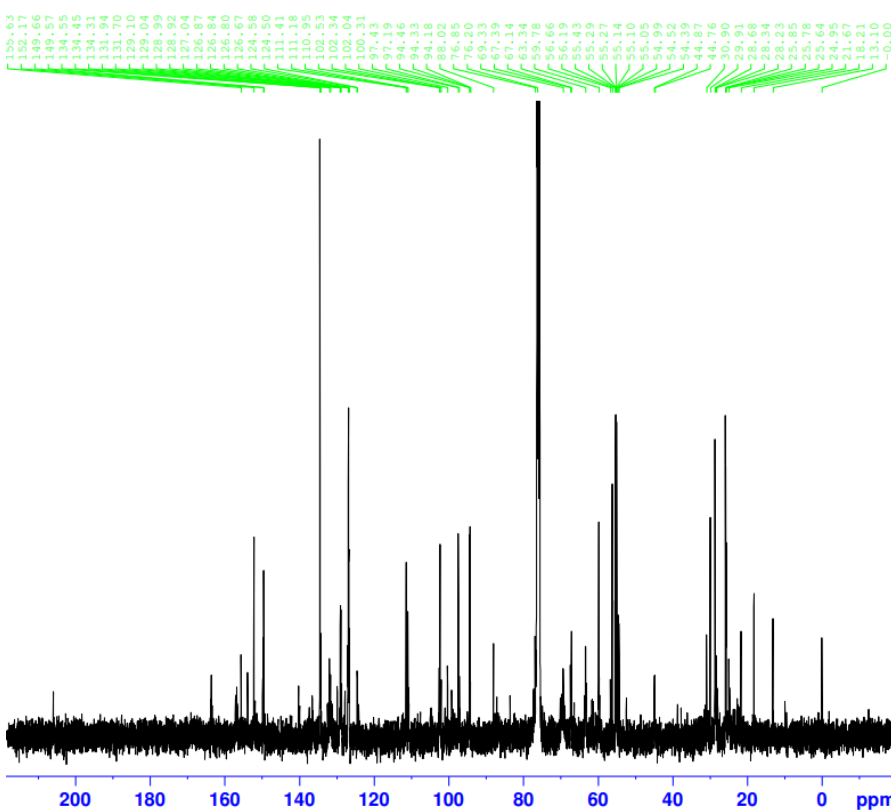

155.63  
152.17  
149.66  
147.77  
134.55  
134.45  
134.31  
131.94  
131.70  
129.10  
128.99  
128.92  
127.04  
126.87  
126.84  
126.80  
124.87  
124.58  
124.50  
111.41  
111.18  
110.95  
102.33  
102.34  
102.04  
100.31  
97.43  
97.19  
94.46  
94.18  
88.02  
76.85  
76.20  
69.33  
67.19  
65.34  
63.34  
59.78  
56.66  
56.19  
55.43  
55.27  
55.14  
55.10  
55.05  
54.99  
54.52  
48.87  
48.87  
44.76  
30.90  
29.91  
28.68  
28.34  
28.24  
25.85  
25.85  
25.78  
25.64  
24.95  
24.67  
18.71  
18.71  
-0.00

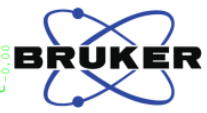

Current Data Parameters  
NAME 1lu-20211103-c-12-4nd-13C  
EXPNO 10  
PROCNO 1

F2 - Acquisition Parameters  
Date\_ 20211104  
Time 10.04 h  
INSTRUM Spect  
PROCNO Z108618\_0934 (  
PULPROG zgpg30  
TD 65536  
SOLVENT CDCl3  
NS 22935  
DS 4  
SWH 24038.461 Hz  
FIDRES 0.733596 Hz  
AQ 1.3631488 sec  
RG 201.24  
DW 20.800 usec  
DE 6.50 usec  
TE 297.1 K  
D1 2.00000000 sec  
D11 0.03000000 sec  
TD0 1  
SFO1 100.5976823 MHz  
NUC1 13C  
P1 10.00 usec  
PLW1 51.00500107 W  
SFO2 400.0316001 MHz  
NUC2 1H  
CPDPRG[2] waltz16  
PCPD2 90.00 usec  
PLW2 13.00000000 W  
PLW12 0.31457001 W  
PLW13 0.15823001 W

F2 - Processing parameters  
SI 32768  
SF 100.5877272 MHz  
WDW EM  
SSB 0  
LB 1.00 Hz  
GB 0  
PC 1.40

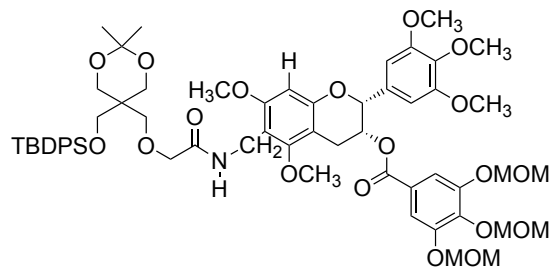

21b

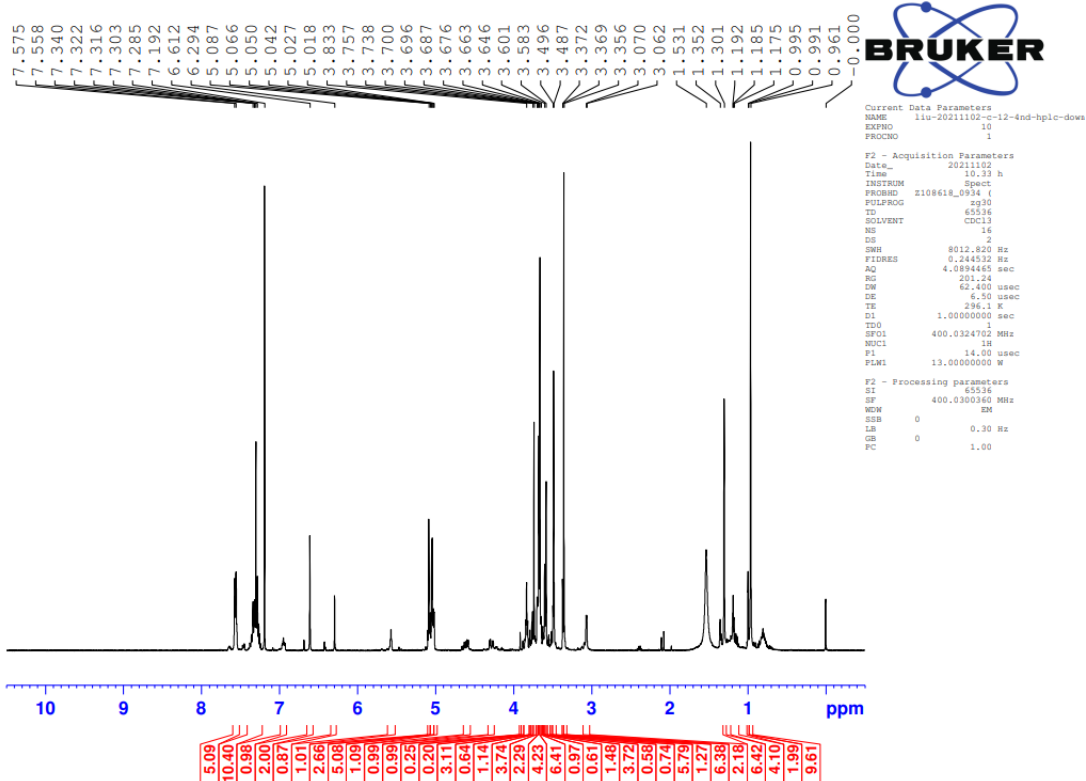

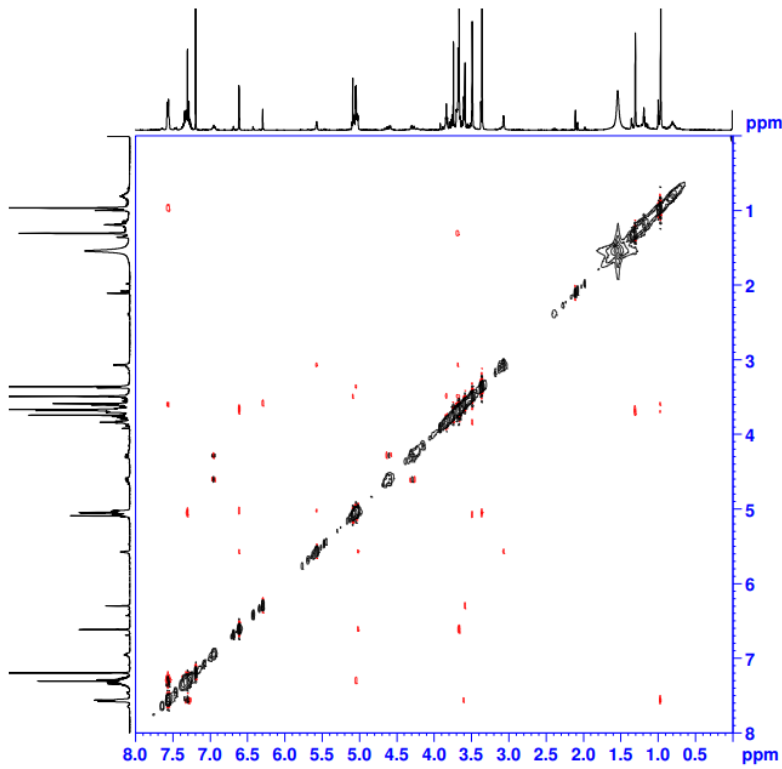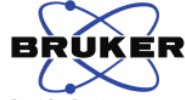

```

Current Data Parameters
NAME      i1u-20211105-c-12-4nd-hpic-down-noisy
EXPNO    10
PROCNO   1

F2 - Acquisition Parameters
Date_    20211105
Time     12.31 h
INSTRUM Spect
PROBHD   Z108618_0934 (
PULPROG zgpg30
TD        65536
SOLVENT  CDCl3
NS        4
DS        2
SWH       3870.449 Hz
FIDRES   3.785124 Hz
AQ        0.2641120 sec
RG        136.63
DE        127.000 usec
TE        296.4
D0        0.0001117 sec
D1        1.9980000 sec
D2        0.3000001 sec
D3        0.1300000 sec
D12       0.0002000 sec
D16       0.0002000 sec
D18       0.0002000 sec
TD0       1
SFO1     400.0315453 MHz
NUC1      13C
P1        14.00 usec
PC        28.00 usec
P21       2500.00 usec
P22       13.0000000 W
P23       2.83109999 W
P24       2.83109999 W
CPDPRG2  wait16
SFO2     400.0315453 MHz
NUC2      1H
P11       1000.00 usec
PC1       14.00 usec

F1 - Acquisition parameters
TD        136
SFO1     400.0315453 MHz
FIDRES   30.281008 Hz
AQ        9.5889 ppm
P21       1000.00 usec
PC1       14.00 usec

F2 - Processing parameters
SI        32768
SF        400.0305160 MHz
RG        65536
DE        0 Hz
TE        296.4
D0        0 Hz
D1        1.00
PC        1.00

F1 - Processing parameters
SI        1024
SF        400.0305160 MHz
RG        65536
DE        0 Hz
TE        296.4
D0        0 Hz
D1        1.00
PC        1.00
  
```

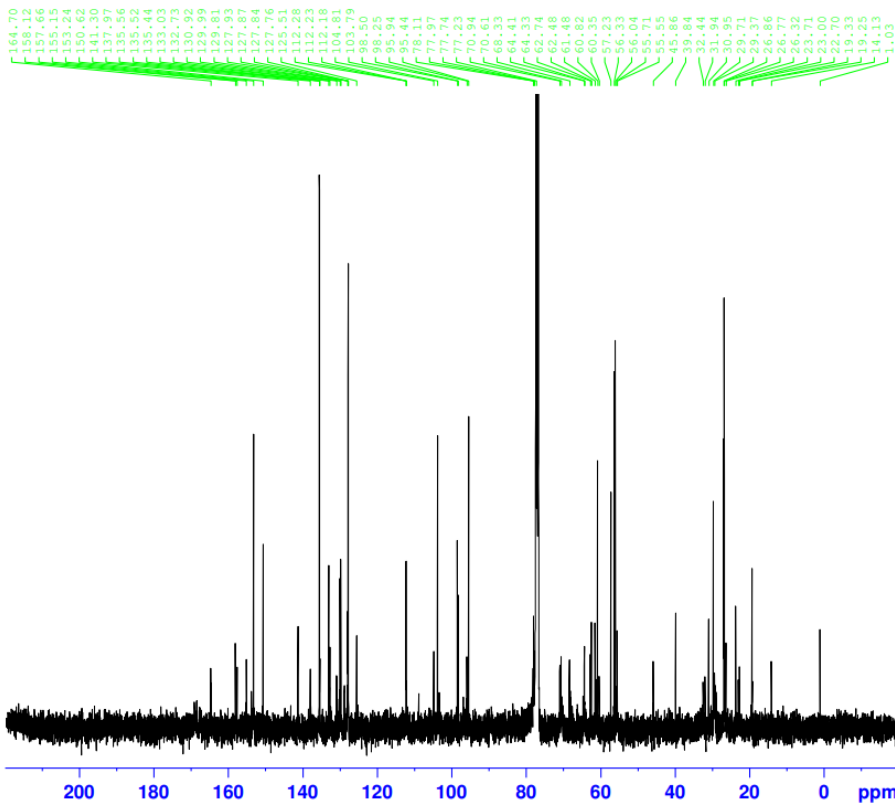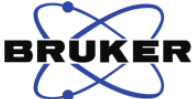

```

Current Data Parameters
NAME      i1u-20211105-c-12-4nd-down-13C
EXPNO    10
PROCNO   1

F2 - Acquisition Parameters
Date_    20211106
Time     12.06 h
INSTRUM Spect
PROBHD   Z108618_0934 (
PULPROG zgpg30
TD        65536
SOLVENT  CDCl3
NS        4
DS        2
SWH       24038.461 Hz
FIDRES   0.733596 Hz
AQ        1.3631488 sec
RG        201.24
DE        20.800 usec
TE        297.1 K
D1        2.0000000 sec
D12       0.0300000 sec
D18       0.0300000 sec
TD0       1
SFO1     100.5976223 MHz
NUC1      13C
P1        10.00 usec
PC        51.0050107 W
SFO2     400.0316001 MHz
NUC2      1H
CPDPRG2  wait16
P21       13.0000000 W
P22       0.31457001 W
P23       0.31457001 W
P24       0.15823001 W

F2 - Processing parameters
SI        32768
SF        100.5976235 MHz
RG        EM
DE        0 Hz
TE        1.00 Hz
D0        0 Hz
D1        1.40
PC        1.40
  
```

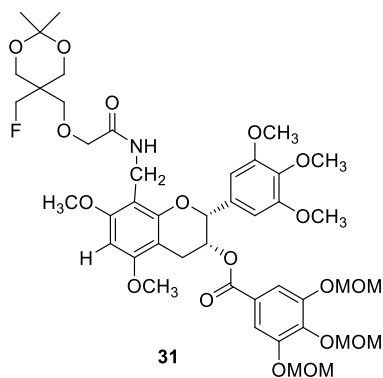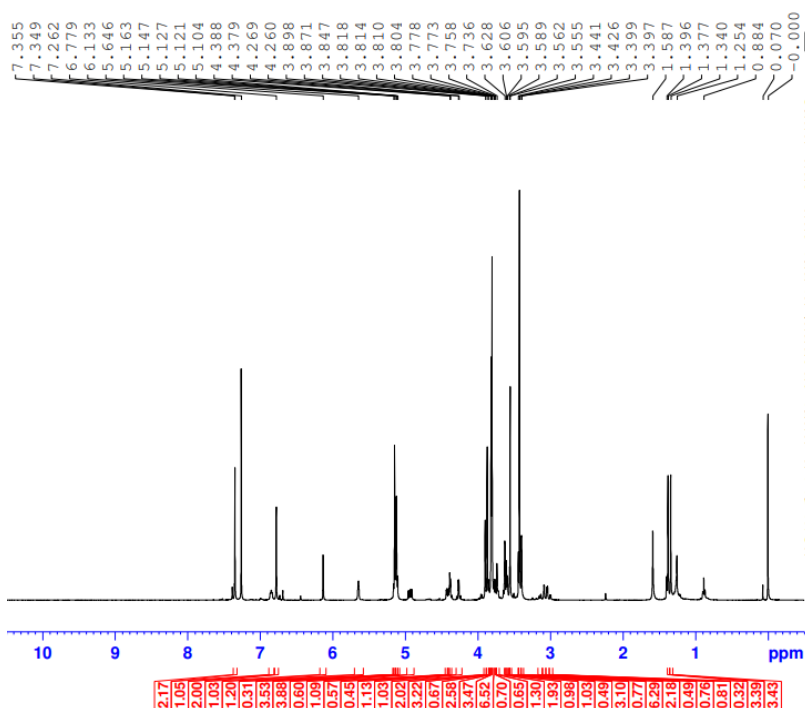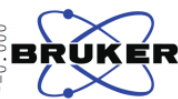

Current Data Parameters  
 NAME liu-20210326-BEGCGF  
 EXPNO 10  
 PROCNO 1

F2 - Acquisition Parameters  
 Date\_ 20210326  
 Time 19.02 h  
 INSTRUM Spect  
 PROBHD Z108618\_0934 ( )  
 FULPROG zg30  
 TD 65536  
 SOLVENT CDCl3  
 NS 32  
 DS 2  
 SWH 8012.820 Hz  
 FIDRES 0.244532 Hz  
 AQ 4.0894465 sec  
 RG 201.24  
 DW 62.400 usec  
 DE 6.50 usec  
 TE 296.8 K  
 D1 1.00000000 sec  
 TD0 1  
 SFO1 400.0324702 MHz  
 NUC1 1H  
 P1 14.00 usec  
 PLW1 13.00000000 W

F2 - Processing parameters  
 SI 65536  
 SF 400.0300080 MHz  
 WDW EM  
 SSB 0  
 LB 0.30 Hz  
 GB 0  
 PC 1.00

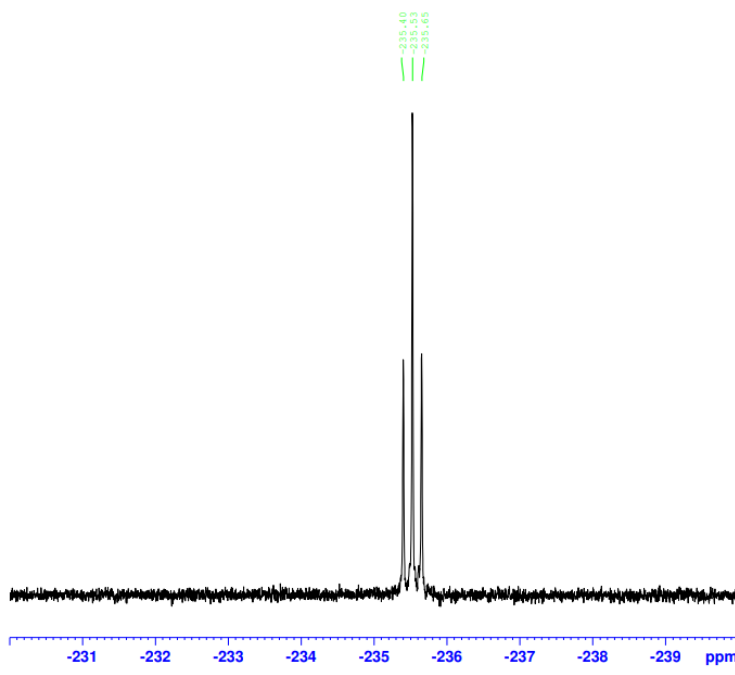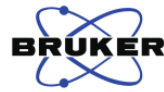

Current Data Parameters  
 NAME illu-20210326-SEGCGF-19F  
 EXPNO 10  
 PROCNO 1

F2 - Acquisition Parameters  
 Date\_ 20210326  
 Time 19.03 h  
 INSTRUM Spect  
 PROBHD Z108618\_0934 (   
 PULPROG zgfglgn  
 TD 131072  
 SOLVENT CDCl3  
 NS 16  
 DS 4  
 SWH 75000.000 Hz  
 FIDRES 1.144409 Hz  
 AQ 0.8738133 sec  
 RG 201.24  
 DW 6.667 usec  
 DE 6.50 usec  
 TE 296.8 K  
 D1 1.00000000 sec  
 TDO 1  
 SFO1 376.3289914 MHz  
 NUC1 19F  
 P1 15.00 usec  
 PLW1 20.81999969 W

F2 - Processing parameters  
 SI 65536  
 SF 376.4042722 MHz  
 WDH EM  
 SSB 0  
 LB 0.30 Hz  
 GB 0  
 PC 1.00

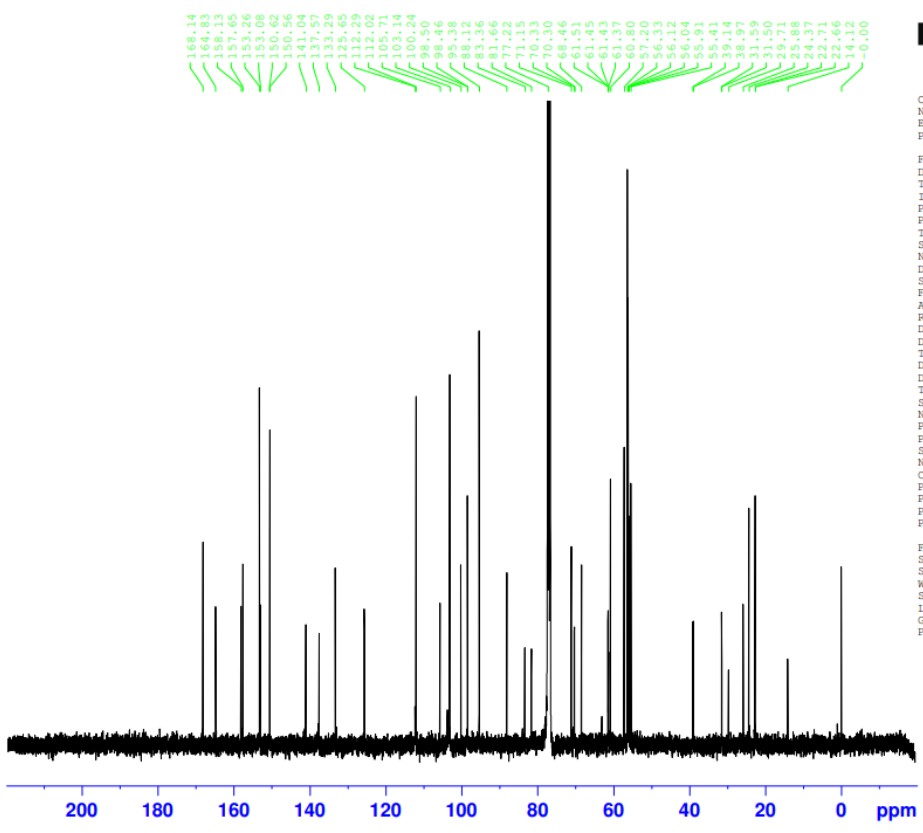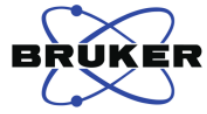

Current Data Parameters  
 NAME illu-20210329-SEGCG F-  
 EXPNO 10  
 PROCNO 1

F2 - Acquisition Parameters  
 Date\_ 20210330  
 Time 10.35 h  
 INSTRUM Spect  
 PROBHD Z108618\_0934 (   
 PULPROG zgpg30  
 TD 65536  
 SOLVENT CDCl3  
 NS 16272  
 DS 4  
 SWH 24038.461 Hz  
 FIDRES 0.733596 Hz  
 AQ 1.3631488 sec  
 RG 201.24  
 DW 20.800 usec  
 DE 6.50 usec  
 TE 297.4 K  
 D1 2.00000000 sec  
 D11 0.03000000 sec  
 TDO 1  
 SFO1 100.5976823 MHz  
 NUC1 13C  
 P1 10.00 usec  
 PLW1 51.00500107 W  
 SFO2 400.0316001 MHz  
 NUC2 1H  
 CPDPRG2 waltz16  
 PCPD2 90.00 usec  
 FLM2 13.00000000 W  
 FLM12 0.31457001 W  
 FLM13 0.15823001 W

F2 - Processing parameters  
 SI 32768  
 SF 100.5876239 MHz  
 WDH EM  
 SSB 0  
 LB 1.00 Hz  
 GB 0  
 PC 1.40



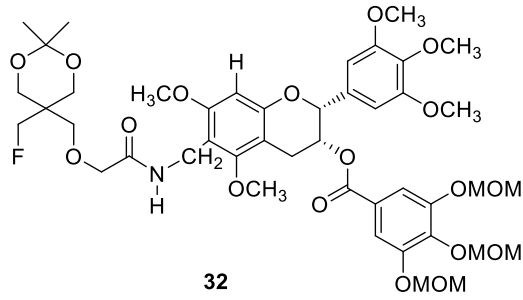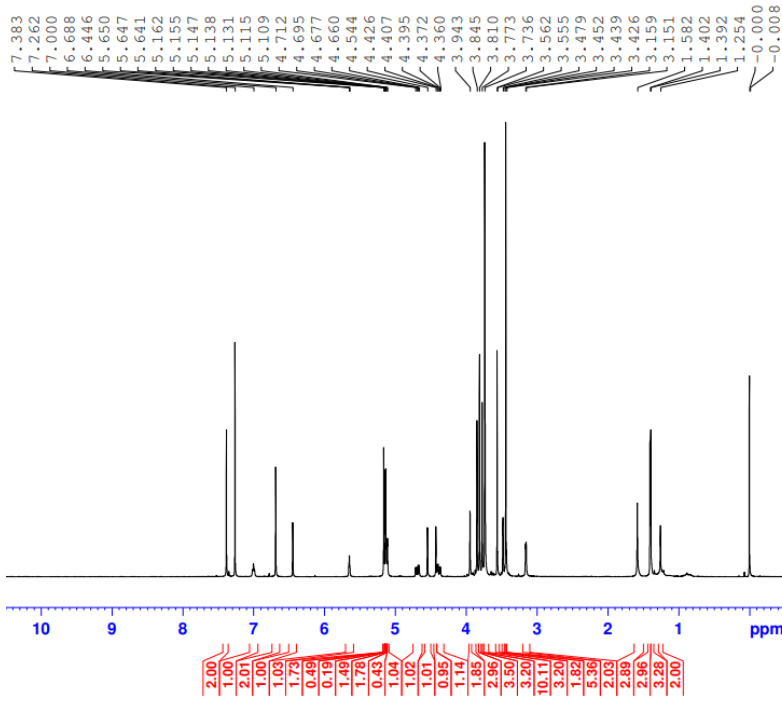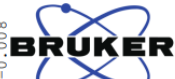

Current Data Parameters  
 NAME i1u-20210326-EGCGF  
 EXPNO 10  
 PROCNO 1

F2 - Acquisition Parameters  
 Date\_ 20210326  
 Time 19.11 h  
 INSTRUM Spect  
 PROBHD z108618\_0934 (4  
 PULPROG zg30  
 TD 65536  
 SOLVENT CDCl3  
 NS 32  
 DS 2  
 SWH 8012.820 Hz  
 FIDRES 0.244532 Hz  
 AQ 4.0894465 sec  
 RG 201.24  
 DW 62.400 usec  
 DE 6.50 usec  
 TE 296.7 K  
 D1 1.00000000 sec  
 TD0 1  
 SFO1 400.0324702 MHz  
 NUC1 1H  
 P1 14.00 usec  
 PLW1 13.00000000 W

F2 - Processing parameters  
 SI 65536  
 SF 400.0300065 MHz  
 WDW EM  
 SSB 0  
 LB 0.30 Hz  
 GB 0  
 PC 1.00

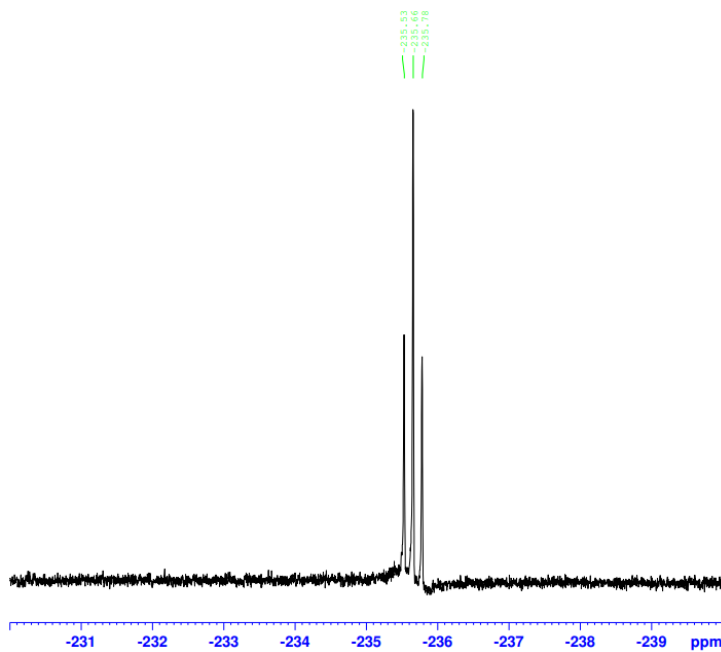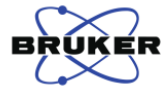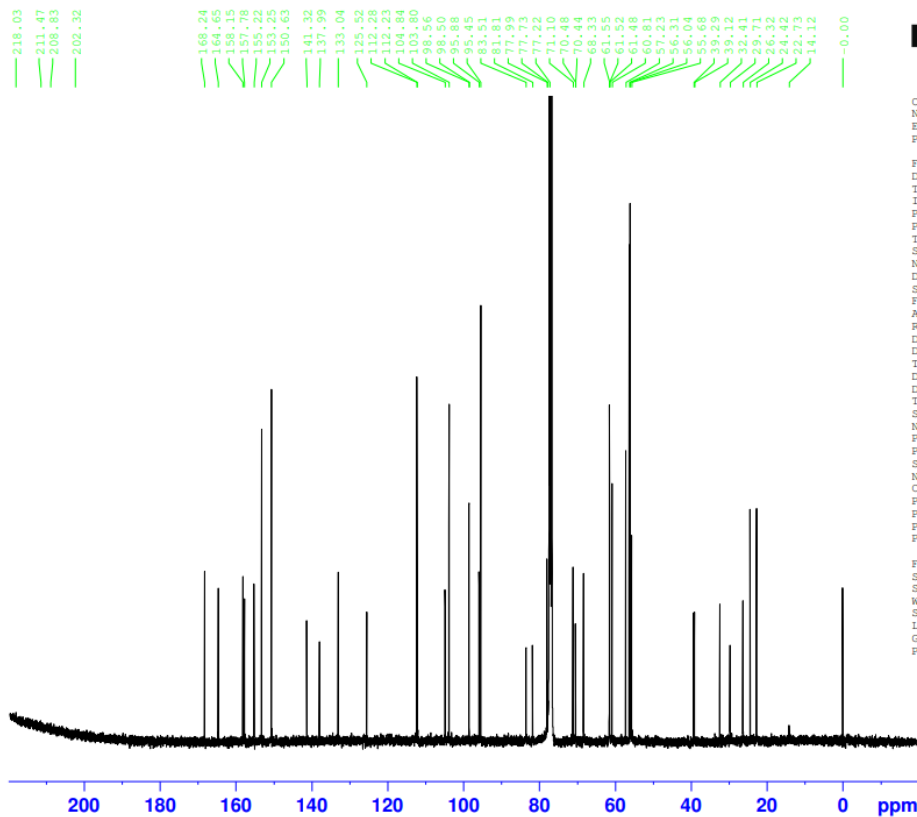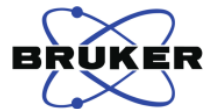

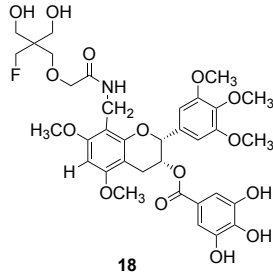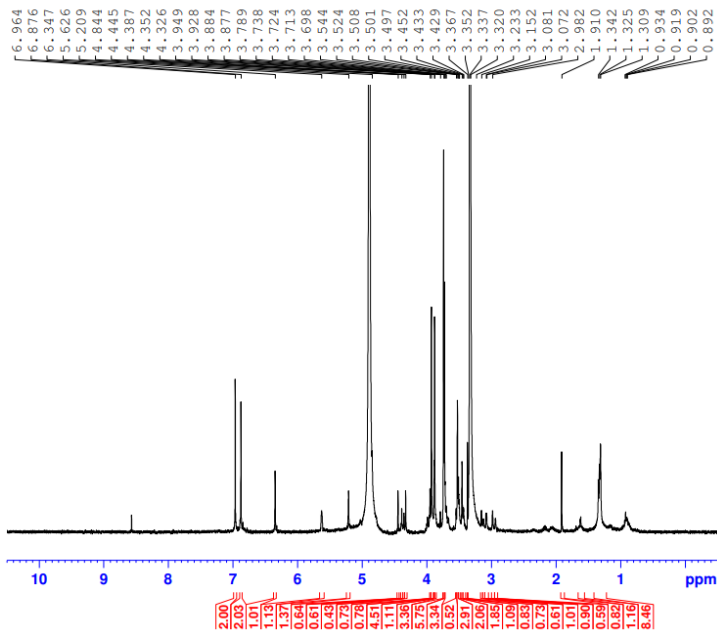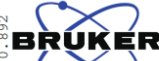

Current Data Parameters  
 NAME 11u-20210331-EGCG F OH 504  
 EXPNO 10  
 PROCNO 1

F2 - Acquisition Parameters  
 Date\_ 20210331  
 Time 14.20 h  
 INSTRUM spect  
 PROBHD z108618\_0934 (1  
 PULPROG zgpg30  
 TD 65536  
 SOLVENT MCD  
 NS 32  
 DS 2  
 SWH 8012.820 Hz  
 FIDRES 0.244632 Hz  
 AQ 4.0894465 sec  
 RG 201.24  
 DW 62.400 usec  
 DE 6.50 usec  
 TE 296.3 K  
 D1 1.0000000 sec  
 TSD 1  
 SFO1 400.0324702 MHz  
 NUC1 1H  
 P1 14.00 usec  
 PLM1 13.0000000 W

F2 - Processing Parameters  
 SI 65536  
 SF 400.0300000 MHz  
 WDM EM  
 SSB 0  
 LB 0.30 Hz  
 GB 0  
 PC 1.00

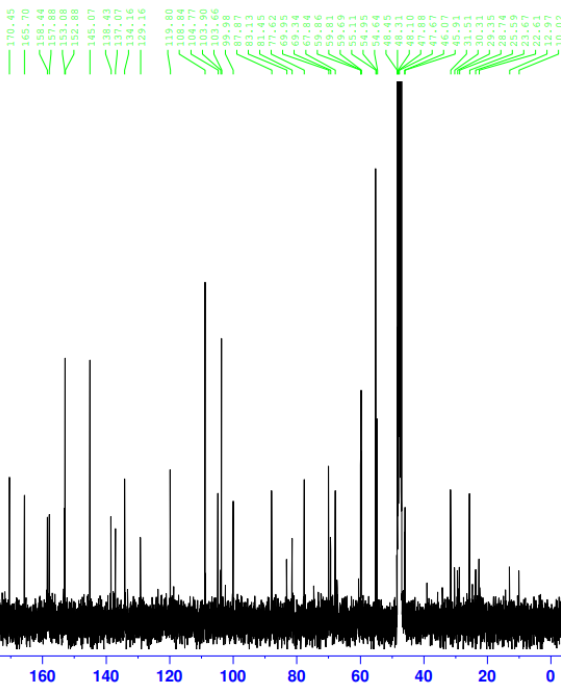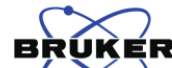

Current Data Parameters  
 NAME 20220308-F OH 8 EGCG 13C  
 EXPNO 10  
 PROCNO 1

F2 - Acquisition Parameters  
 Date\_ 20220308  
 Time 17.48 h  
 INSTRUM spect  
 PROBHD z108618\_0934 (1  
 PULPROG zgpg30  
 TD 65536  
 SOLVENT MCD  
 NS 1867  
 DS 4  
 SWH 24038.461 Hz  
 FIDRES 0.733596 Hz  
 AQ 1.3631488 sec  
 RG 201.24  
 DW 20.800 usec  
 DE 6.50 usec  
 TE 297.3 K  
 D1 2.0000000 sec  
 D11 0.0300000 sec  
 TSD 1  
 SFO1 100.5976823 MHz  
 NUC1 13C  
 P1 10.00 usec  
 PLM1 51.00500107 W  
 SFO2 400.0316001 MHz  
 NUC2 1H  
 CDPORG2 waitz16  
 PCPZ2 50.00 usec  
 PLM2 13.0000000 W  
 PLM12 0.31457001 W  
 PLM13 0.15823001 W

F2 - Processing parameters  
 SI 32768  
 SF 100.5876235 MHz  
 WDM EM  
 SSB 0  
 LB 1.00 Hz  
 GB 0  
 PC 1.40

-239.79

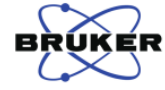

Current Data Parameters  
NAME: 11u-20210331-ESGC F OH 704  
EXPNO: 12  
PROCNO: 1

F2 - Acquisition Parameters  
Date\_: 20210331  
Time: 14.37 h  
INSTRUM: spect  
PROBHD: 5108618\_09M (1  
PULPROG: zgpg30  
TD: 131072  
SOLVENT: MeOD  
NS: 32  
DS: 4  
SWH: 75000.000 Hz  
FIDRES: 1.144409 Hz  
AQ: 0.8738133 sec  
RG: 200.24  
DW: 6.667 usec  
DE: 6.50 usec  
TE: 298.2 K  
D1: 1.00000000 sec  
TDO: 1  
SFO1: 376.328914 MHz  
NUC1: 13C  
P1: 15.00 usec  
PLM1: 20.81999989 W

F2 - Processing parameters  
SI: 65536  
SF: 376.4547122 MHz  
WDW: EM  
SSB: 0  
LB: 0.30 Hz  
GB: 0  
PC: 1.00

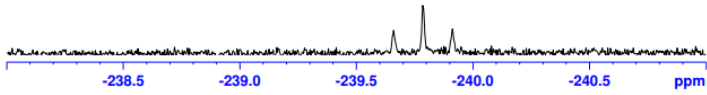

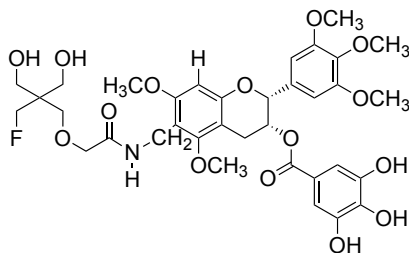

19

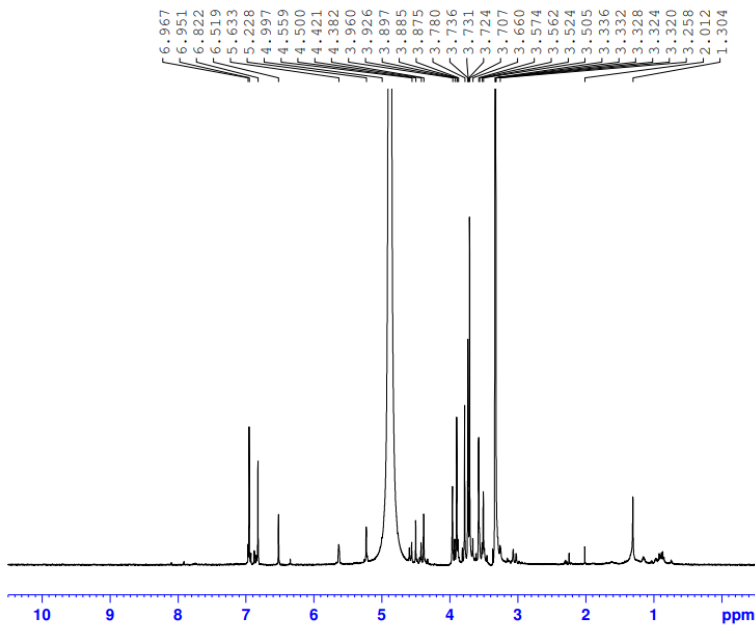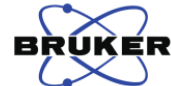

Current Data Parameters  
 NAME l1i-20210311-down-pink  
 EXPNO 10  
 PROCNO 1

F2 - Acquisition Parameters  
 Date\_ 20210311  
 Time 18.08 h  
 INSTRUM Spect  
 PROBHD z108618\_0934 (   
 PULPROG zg30  
 TD 65536  
 SOLVENT MeOD  
 NS 16  
 DS 2  
 SWH 8012.820 Hz  
 FIDRES 0.244532 Hz  
 AQ 4.0894465 sec  
 RG 98.29  
 DW 62.400 usec  
 DE 6.50 usec  
 TE 296.8 K  
 D1 1.00000000 sec  
 TDO 1  
 SFO1 400.0324702 MHz  
 NUC1 1H  
 P1 14.00 usec  
 PLW1 13.00000000 W

F2 - Processing parameters  
 SI 65536  
 SF 400.0300000 MHz  
 WDW EM  
 SSB 0  
 LB 0.30 Hz  
 GB 0  
 PC 1.00

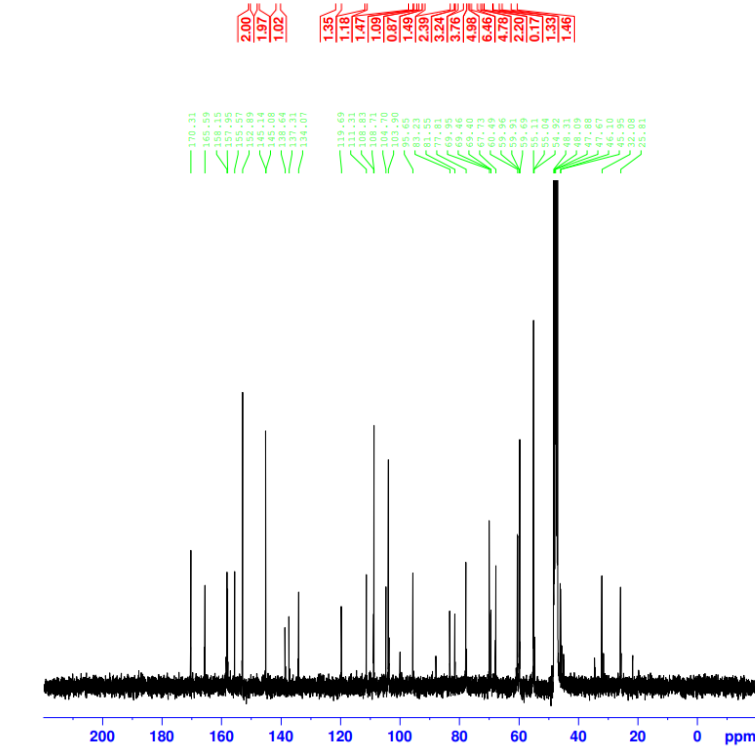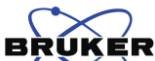

Current Data Parameters  
 NAME 20220308-F 08 6 EOCG 13C  
 EXPNO 10  
 PROCNO 1

F2 - Acquisition Parameters  
 Date\_ 20220308  
 Time 10.22 h  
 INSTRUM Spect  
 PROBHD z108618\_0934 (   
 PULPROG zgpg30  
 TD 65536  
 SOLVENT MeOD  
 NS 17301  
 DS 4  
 SWH 24038.461 Hz  
 FIDRES 0.733596 Hz  
 AQ 1.3631488 sec  
 RG 201.24  
 DW 20.800 usec  
 DE 6.50 usec  
 TE 297.2 K  
 D1 2.00000000 sec  
 D11 0.03000000 sec  
 TDO 1  
 SFO1 100.5976823 MHz  
 NUC1 13C  
 P1 10.00 usec  
 PLM1 51.00500107 W  
 SFO2 400.0316001 MHz  
 NUC2 1H  
 CPDPRG12 waltz16  
 PCPD2 90.00 usec  
 PLM2 13.00000000 W  
 PLM12 0.31457001 W  
 PLM13 0.15823001 W

F2 - Processing parameters  
 SI 32768  
 SF 100.5876235 MHz  
 WDW EM  
 SSB 0  
 LB 1.00 Hz  
 GB 0  
 PC 1.40

"liu-20210330-6EGCG F OH-19F" 12 1 D:\Master\nmr

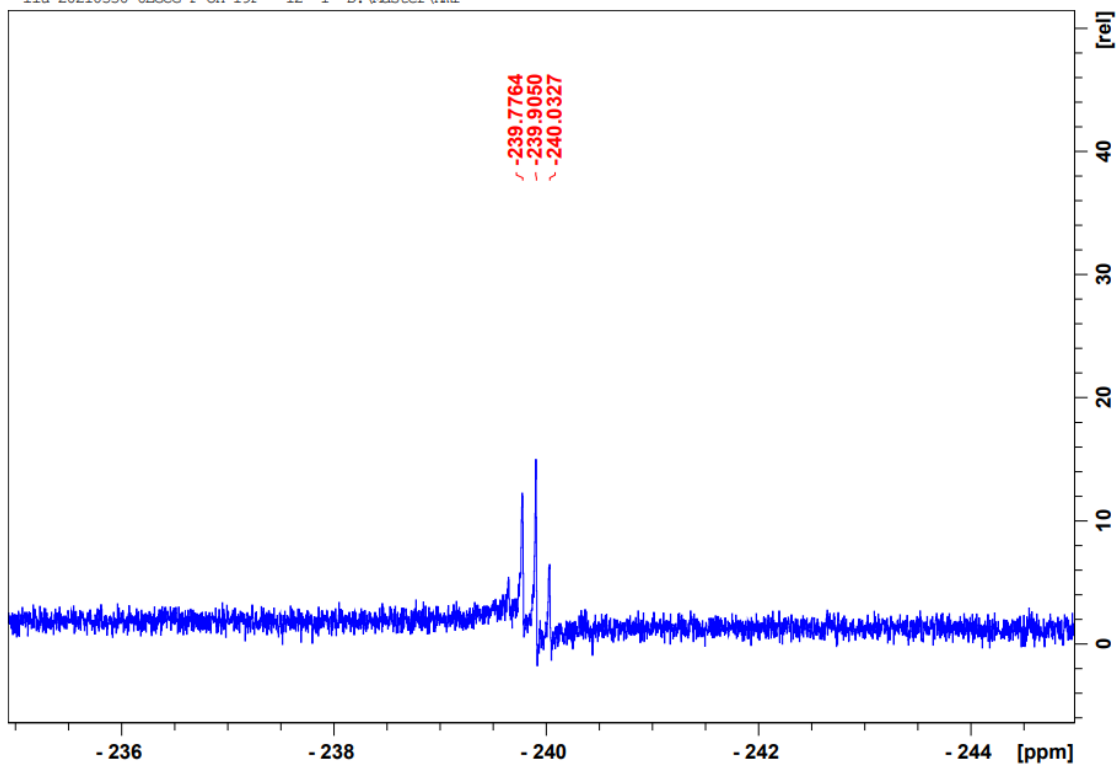

Supplement: d3ob00856h1.pdf [file d3ob00856h1.pdf]
